# Supplementary material for: Early Transcriptional Changes Induced by Wnt/β-Catenin Signaling in Hippocampal Neurons
Source: Hindawi journal article supplement (doi:10.1155/2016/4672841), 2016-01-01
Supplement: f1 [file 4672841.f1.zip]

Archive with 3 entries (3 files):
- Supplementary Materials/gdf_Supplementary Table 3_NP_1811961.xlsx
- Supplementary Materials/gdf_Supplementary Table 4_NP_1811962.xlsx
- Supplementary Materials/gdf_Wnt3a transcriptional program in RHN_suppl information_NP_1811960.pdf
