# Supplementary material for: Early Transcriptional Changes Induced by Wnt/β-Catenin Signaling in Hippocampal Neurons
Source: Hindawi journal article supplement (doi:10.1155/2016/4672841), 2016-01-01
Supplement: f1 [file 4672841.f1.zip › Supplementary Materials/gdf_Supplementary Table 3_NP_1811961.xlsx]

## Sheet: Supplementary Table 3
Supplementary Table 3. Differentially expressed genes in hippocampal neurons upon Wnt3a treatment (4 h).
Rank	id	baseMean	baseMeanA	baseMeanB	foldChange	log2FoldChange	pval	padj	Wnt pathway	Wnt References	Ca2+ Signaling	Ca2+ References
1	Fam84a	1902.92	1120.33	2685.52	2.39708	1.26128	2.17627e-06	0.0353796	---	---	---	---
2	Notum	67.3179	8.90586	125.73	14.1177	3.81943	1.53958e-05	0.0930071	Wnt target gene	Chang MV et al. Activation of wingless targets requires bipartite recognition of DNA by TCF. Curr Biol. 2008 Dec 9;18(23):1877-81. doi: 10.1016/j.cub.2008.10.047.	---	---
3	Lef1	460.193	299.386	621	2.07424	1.05259	1.71631e-05	0.0930071	Wnt target gene	Wnt Homepage / Hovanes K et al. Beta-catenin-sensitive isoforms of lymphoid enhancer factor-1 are selectively expressed in colon cancer. Nat Genet. 2001 May;28(1):53-7.	functional	Wisniewska MB et al. Novel β-catenin target genes identified in thalamic neurons encode modulators of neuronal excitability. BMC Genomics 2012. 13:635. DOI: 10.1186/1471-2164-13-
4	Axin2	970.782	429.267	1512.3	3.52297	1.81679	0.000116596	0.452258	Wnt target gene	Wnt Homepage / Jho EH et al. Wnt/beta-catenin/Tcf signaling induces the transcription of Axin2, a negative regulator of the signaling pathway. Mol Cell Biol. 2002 Feb;22(4):1172-83.	functional	Kassen D et al.The bone marrow stromal compartment in multiple myeloma patients retains capability for osteogenic differentiation in vitro: defining the stromal defect in myeloma. 30 July 2014. DOI: 10.1111/bjh.13020
5	Prkg2	64.9347	35.2127	94.6566	2.68813	1.42661	0.000139096	0.452258	functional	Kawasaki Y et al. Phosphorylation of GSK-3beta by cGMP-dependent protein kinase II promotes hypertrophic differentiation of murine chondrocytes. J Clin Invest. 2008 Jul;118(7):2506-15. doi: 10.1172/JCI35243.	functional	Kawasaki Y et al. Phosphorylation of GSK-3beta by cGMP-dependent protein kinase II promotes hypertrophic differentiation of murine chondrocytes. J Clin Invest. 2008 Jul;118(7):2506-15. doi: 10.1172/JCI35243.
6	Cxcl3	19.3793	6.8653	31.8934	4.64559	2.21586	0.000519008	1	Wnt target gene	Segditsas S et al. Putative direct and indirect Wnt targets identified through consistent gene expression changes in APC-mutant intestinal adenomas from humans and mice. Hum Mol Genet. 2008 Dec 15;17(24):3864-75. doi: 10.1093/hmg/ddn286.	functional	Lüttichau HR. The Cytomegalovirus UL146 Gene Product vCXCL1 Targets Both CXCR1 and CXCR2 as an Agonist. December 31, 2009. doi: 10.1074/jbc.M109.002774
7	Ahr	529.757	344.798	714.716	2.07286	1.05162	0.00102996	1	Wnt target gene	Gerbal-Chaloin S et al. The WNT/beta-catenin pathway is a transcriptional regulator of CYP2E1, CYP1A2, and aryl hydrocarbon receptor geneexpression in primary human hepatocytes. Mol Pharmacol. 2014 Dec;86(6):624-34. doi: 10.1124/mol.114.094797.	functional	Štěpánkováa M et al. Optical isomers of dihydropyridine calcium channel blockers display enantiospecific effects on the expression and enzyme activities of human xenobiotics-metabolizing cytochromes P450. Toxicology Letters. 11 October 2016. http://dx.doi.org/10.1016/j.toxlet.2016.10.005
8	Stk32a	169.985	121.219	218.751	1.8046	0.851679	0.001263	1	---	---	---	---
9	Itga9	74.618	49.4408	99.7952	2.01848	1.01327	0.0017278	1	---	---	---	---
10	Tnfrsf19	2391.59	1399.76	3383.43	2.41716	1.27331	0.00179288	1	Wnt target gene	Wnt Homepage / Buttitta L et al. Microarray analysis of somitogenesis reveals novel targets of different WNT signaling pathways in the somitic mesoderm. Dev Biol. 2003 Jun 1;258(1):91-104.	---	---
11	Tmem72	240.452	175.089	305.815	1.74663	0.804571	0.0019818	1	---	---	---	---
12	Fras1	1325.54	911.52	1739.55	1.90841	0.932369	0.00216882	1	---	---	---	---
13	Fam167a	1211.84	860.845	1562.84	1.81548	0.860349	0.00220163	1	---	---	---	---
14	Gata2	32.6156	17.1364	48.0949	2.8066	1.48883	0.00230261	1	Wnt target gene	Gustafson B and Smith U. Activation of canonical wingless-type MMTV integration site family (Wnt) signaling in mature adipocytes increases beta-catenin levels and leads to cell dedifferentiation and insulin resistance. J Biol Chem. 2010 Apr 30;285(18):14031-41. doi: 10.1074/jbc.M110.102855.	functional	Ikari A et al. Hyperosmolarity-Induced Down-Regulation of Claudin-2 Mediated by Decrease in PKCβ-Dependent GATA-2 in MDCK Cells. Journal of Cellular Physiology. 27 July 2015. DOI: 10.1002/jcp.25004
15	Id2	1555.39	1356.57	1754.2	1.29311	0.370847	0.00301035	1	Wnt target gene	Wnt Homepage / Rockman SP et al. Id2 is a target of the beta-catenin/T cell factor pathway in colon carcinoma. J Biol Chem. 2001 Nov 30;276(48):45113-9.	calcium target	Moreno M et al. Transcriptional Profiling of Hypoxic Neural Stem Cells Identifies Calcineurin-NFATc4 Signaling as a Major Regulator of Neural Stem Cell Biology. Stem Cell Reports. July 30, 2015. DOI: http://dx.doi.org/10.1016/j.stemcr.2015.06.008
16	Msx2	81.6262	52.7893	110.463	2.09253	1.06525	0.00386319	1	Wnt target gene	Zhai Y et al. MSX2 is an oncogenic downstream target of activated WNT signaling in ovarian endometrioid adenocarcinoma. Oncogene. 2011 Oct 6;30(40):4152-62. doi: 10.1038/onc.2011.123.	---
17	Sp5	154.188	27.203	281.173	10.3361	3.36962	0.00423145	1	Wnt target gene	Fujimura N et al. Wnt-mediated down-regulation of Sp1 target genes by a transcriptional repressor Sp5. J Biol Chem. 2007 Jan 12;282(2):1225-37.	---
18	Cd83	607.179	398.178	816.18	2.04979	1.03547	0.00440376	1	---	---	functional	Pereira M et al. Transcriptional Profiling of Hypoxic Neural Stem Cells IdentDendritic cell membrane CD83 enhances immune responses by boosting intracellular calcium release in T lymphocytes. Journal of Leukocyte Biology. January 16, 2014, doi:10.1189/jlb.0413239
19	Cgnl1	840.236	665.871	1014.6	1.52372	0.607596	0.00487031	1	---	---	---	---
20	Hunk	303.213	242.034	364.392	1.50554	0.59028	0.00527276	1	Wnt target gene	Reed KR et al. Hunk/Mak-v is a negative regulator of intestinal cell proliferation. BMC Cancer. 2015 Mar 8;15:110. doi: 10.1186/s12885-015-1087-2.	---	---
21	Kcns3	102.299	76.1918	128.407	1.68531	0.753014	0.00555535	1	---	---	---	---
22	Adamts19	50.4412	33.9642	66.9182	1.97025	0.978382	0.00568949	1	---	---	---	---
23	Kcnj13	101.952	81.7325	122.171	1.49477	0.579925	0.00588673	1	---	---	---	---
24	Hey1	424.814	320.703	528.925	1.64927	0.721827	0.00613313	1	Wnt target gene	Petrovic J et al. Differential regulation of Hes/Hey genes during inner ear development. Dev Neurobiol. 2015 Jul;75(7):703-20. doi: 10.1002/dneu.22243.	---	---
25	Sgms2	57.6323	38.3359	76.9287	2.0067	1.00482	0.00716205	1	---	---	---	---
26	Cbln4	184.554	127.484	241.625	1.89533	0.922448	0.00755245	1	---	---	functional	Strowskia M et al. Insulinostatic activity of cerebellin — Evidence from in vivo and in vitro studies in rats. Regulatory Peptides. October 2009. http://dx.doi.org/10.1016/j.regpep.2009.05.010
27	Nr2e1	343.855	252.152	435.558	1.72736	0.788572	0.00884251	1	functional	Qu Q et al. Orphan nuclear receptor TLX activates Wnt/beta-catenin signalling to stimulate neural stem cell proliferation and self-renewal. Nat Cell Biol. 2010 Jan;12(1):31-40; sup pp 1-9. doi: 10.1038/ncb2001.	---	---
28	Plekhg1	778.018	597.77	958.266	1.60307	0.680835	0.00907405	1	---	---	---	---
29	Slc16a6	415.471	344.058	486.885	1.41512	0.500928	0.00941942	1	---	---	---	---
30	Nfat5	2325.93	1743.85	2908.01	1.66758	0.737754	0.0095246	1	functional	Wang Q et al. NFAT5 represses canonical Wnt signaling via inhibition of _-catenin acetylation and participates in regulating intestinal cell differentiation. Cell Death Dis. 2013 Jun 13;4:e671. doi: 10.1038/cddis.2013.202.	Direct	GO:0019722
31	Bdnf	2543.71	2175.08	2912.35	1.33896	0.421115	0.00958639	1	Wnt target gene	Yi H et al. Expression of brain-derived neurotrophic factor is regulated by the Wnt signaling pathway. Neuroreport. 2012 Feb 15;23(3):189-94. doi: 10.1097/WNR.0b013e32834fab06.	---	---
32	Gpr149	162.396	130.143	194.649	1.49565	0.580778	0.00979672	1	---	---	---	---
33	5_8S_rRNA	33.9468	14.7462	53.1475	3.60415	1.84966	0.00991885	1	---	---	---	---
34	Rgs2	766.352	607.413	925.291	1.52333	0.607231	0.0103651	1	functional	Subramaniam S et al. Distinct transcriptional networks in quiescent myoblasts: a role for Wnt signaling in reversible vs. irreversible arrest. PLoS One. 2013 Jun 3;8(6):e65097. doi: 10.1371/journal.pone.0065097.	functional	Schoeber J et al. RGS2 Inhibits the Epithelial Ca2+ Channel TRPV6. The Journal of Biological Chemistry. October 6, 2006. doi: 10.1074/jbc.M606233200
35	Cdon	936.987	719.931	1154.04	1.60299	0.680767	0.0105878	1	---	---	functional	McLellan J. S. et al. The mode of Hedgehog binding to Ihog homologues is not conserved across different phyla. Nature 2008. doi: 10.1038/nature07358
36	Nr4a2	401.555	320.134	482.977	1.50867	0.593279	0.0106746	1	functional	Smith AG et al. Regulation of NR4A nuclear receptor expression by oncogenic BRAF in melanoma cells. Pigment Cell Melanoma Res. 2011 Jun;24(3):551-63. doi: 10.1111/j.1755-148X.2011.00843.x.	calcium target	Monticone S et al. A case of severe hyperaldosteronism caused by a de novo mutation affecting a critical salt bridge Kir3. 4 residue. The Journal of Clinical Endocrinology & Metabolism, October 2014. DOI: http://dx.doi.org/10.1210/jc.2014-3636
37	Pou3f3	1803.26	1393.71	2212.8	1.5877	0.666938	0.0108145	1	---	---	---	---
38	Cit	602.079	425.203	778.954	1.83196	0.873387	0.0110593	1	---	---	---	---
39	Adgrl2	1577.93	1238.32	1917.53	1.54849	0.63086	0.0112835	1	---	---	---	---
40	Qtrtd1	149.29	106.837	191.742	1.79471	0.843748	0.011516	1	---	---	---	---
41	AABR07036035.1	196.286	111.855	280.716	2.50964	1.32748	0.0118621	1	---	---	---	---
42	Ankrd44	188.266	137.846	238.687	1.73155	0.792063	0.0119616	1	---	---	---	---
43	Lgr6	92.2486	60.7576	123.74	2.03661	1.02617	0.0122088	1	Wnt target gene	Zhang Y et al. Dynamic expression of Lgr6 in the developing and mature mouse cochlea. Front Cell Neurosci. 2015 May 12;9:165. doi: 10.3389/fncel.2015.00165.	---	---
44	Tcf7	132.596	84.0454	181.148	2.15536	1.10793	0.0127236	1	Wnt target gene	Wnt Homepage / Roose J et al. Synergy between tumor suppressor APC and the beta-catenin-Tcf4 target Tcf1. Science. 1999 Sep 17;285(5435):1923-6.	---	---
45	7SK	282.396	200.484	364.308	1.81715	0.861674	0.0128396	1	---	---	functional	Chen R et al. PP2B and PP1α cooperatively disrupt 7SK snRNP to release P-TEFb for transcription in response to Ca2+ signaling. Genes & development, 2008. doi: 10.1101/gad.1636008
46	Frem2	132.711	93.2867	172.135	1.84522	0.883794	0.0132217	1	---	---	functional	Jadeja S et al. Identification of a new gene mutated in Fraser syndrome and mouse myelencephalic blebs. Nature genetics 2005, 37(5), 520-525. doi:10.1038/ng1549
47	Prss56	10.3034	4.23568	16.371	3.86503	1.95048	0.0135829	1	---	---	---	---
48	Tspan18	2816.89	3155.75	2478.03	0.785243	-0.348788	0.0138297	1	---	---	---	---
49	Tbx2	20.6811	13.5451	27.8171	2.05367	1.0382	0.0139229	1	Wnt target gene	Verhoeven MC et al. Wnt signaling regulates atrioventricular canal formation upstream of BMP and Tbx2. Birth Defects Res A Clin Mol Teratol. 2011 Jun;91(6):435-40. doi: 10.1002/bdra.20804.	---	---
50	Nkd1	410.584	220.374	600.794	2.72624	1.44691	0.0140297	1	Wnt target gene	Stancikova J et al. NKD1 marks intestinal and liver tumors linked to aberrant Wnt signaling. Cell Signal. 2015 Feb;27(2):245-56. doi: 10.1016/j.cellsig.2014.11.008.	---	---
51	Pou2f1	139.249	90.1088	188.389	2.09068	1.06397	0.0140567	1	---	---	---	---
52	Chst2	3985.73	3485.8	4485.66	1.28684	0.363828	0.0143071	1	---	---	---	---
53	Zfp703	1465.13	1215.15	1715.11	1.41144	0.497165	0.0144169	1	Wnt target gene	Kumar A et al. Zfp703 Is a Wnt/_-Catenin Feedback Suppressor Targeting the _-Catenin/Tcf1 Complex. Mol Cell Biol. 2016 May 31;36(12):1793-802. doi: 10.1128/MCB.01010-15.	---	---
54	Gadd45a	895.701	721.512	1069.89	1.48284	0.568366	0.0150099	1	---	---	---	---
55	U1	68.2726	48.0017	88.5435	1.84459	0.883301	0.0153516	1	---	---	---	---
56	Tfap2c	152.745	101.513	203.977	2.00936	1.00674	0.0164276	1	---	---	---	---
57	Kl	149.318	118.276	180.36	1.52491	0.608721	0.0165983	1	functional	Tang X et al. Klotho: a tumor suppressor and modulator of the Wnt/_-catenin pathway in human hepatocellular carcinoma. Lab Invest. 2016 Feb;96(2):197-205. doi:10.1038/labinvest.2015.86.	functional	Xu Y & Sun Z. Molecular basis of Klotho: from gene to function in aging. Endocrine reviews. February 2015, 36(2), 174-193. DOI: http://dx.doi.org/10.1210/er.2013-1079
58	Ch25h	27.9232	21.7004	34.146	1.57352	0.653995	0.0168118	1	---	---	---	---
59	Synpo2	234.112	158.368	309.856	1.95656	0.968321	0.0168957	1	---	---	---	---
60	Nog	247.971	202.787	293.156	1.44564	0.531707	0.0174255	1	functional	Yuan G, Yang G, Zheng Y, Zhu X, Chen Z, Zhang Z, Chen Y. The non-canonical BMP and Wnt/_-catenin signaling pathways orchestrate early tooth development. Development. 2015 Jan 1;142(1):128-39. doi: 10.1242/dev.117887.	---	---
61	Fjx1	2161.62	1827.29	2495.96	1.36594	0.449892	0.0177893	1	---	---	---	---
62	Foxo3	478.89	366.423	591.358	1.61387	0.690523	0.0187819	1	functional	Ordonez-Morin P et al. SPROUTY2 is a _-catenin and FOXO3a target gene indicative of poor prognosis in colon cancer. Oncogene. 2014 Apr 10;33(15):1975-85. doi: 10.1038/onc.2013.140.	functional	Dick O & Badin H. Synaptic activity and nuclear calcium signaling protect hippocampal neurons from death signal-associated nuclear translocation of FoxO3a induced by extrasynaptic N-methyl-D-aspartate receptors. Journal of Biological Chemistry. March 2010, 285(25), 19354-19361. doi: 10.1074/jbc.M110.127654
63	RGD1562948	1100.42	1222.62	978.22	0.800102	-0.321744	0.0189607	1	---
64	Dach1	38.1797	27.4253	48.934	1.78426	0.835329	0.0190128	1	functional	Yan W et al. Epigenetic regulation of DACH1, a novel Wnt signaling component in colorectal cancer. Epigenetics. 2013 Dec;8(12):1373-83. doi: 10.4161/epi.26781.	---	---
65	Efna5	58.6344	41.5372	75.7316	1.82323	0.866493	0.019055	1	---	---	---	---
66	Tle3	1914.21	1631.97	2196.45	1.34588	0.428554	0.0192514	1	Wnt target gene	Kokabu S et al. Expression of TLE3 by bone marrow stromal cells is regulated by canonical Wnt signaling. FEBS Lett. 2014 Feb 14;588(4):614-9. doi: 10.1016/j.febslet.2013.12.031.	---	---
67	Sh3rf2	29.7893	17.0021	42.5765	2.5042	1.32435	0.0196131	1	---	---	---	---
68	Tmem254	1783.15	1995.15	1571.15	0.787484	-0.344678	0.0197044	1	---	---	---	---
69	Epha3	707.778	538.982	876.573	1.62635	0.701636	0.0198668	1	---	---	---	---
70	Galr3	10.6923	4.46985	16.9147	3.78416	1.91997	0.020265	1	---	---	---	---
71	Olr1	20.7055	9.68888	31.7221	3.27407	1.71109	0.0203681	1	---	---	functional	Murphy J. E. et al. LOX-1 scavenger receptor mediates calcium-dependent recognition of phosphatidylserine and apoptotic cells. Biochemical Journal. Jan 2006. 393(1), 107-115. DOI: 10.1042/BJ20051166
72	Cd2ap	306.729	240.793	372.665	1.54765	0.630083	0.0216053	1	---	---	---	---
73	Atoh8	105.057	85.0804	125.034	1.4696	0.555425	0.0219392	1	---	---	---	---
74	Fgfr2	2437.8	2114.01	2761.6	1.30634	0.385526	0.0221746	1	---	---	---	---
75	Fam212b	1105.11	1253.85	956.358	0.762737	-0.390743	0.0221798	1	---	---	---	---
76	Prr5l	282.815	210.73	354.9	1.68415	0.752016	0.0222353	1	---	---	---	---
77	RT1-T24-4	72.2325	55.3454	89.1196	1.61024	0.687279	0.0227427	1	---	---	---	---
78	Fam107a	6000.58	4228.77	7772.39	1.83798	0.87812	0.0227805	1	---	---	---	---
79	Mmp9	62.6263	46.9323	78.3202	1.66879	0.738802	0.0229022	1	Wnt target gene	Wnt Homepage / Wu B et al. Wnt signaling induces matrix metalloproteinase expression and regulates T cell transmigration. Immunity. 2007 Feb;26(2):227-39.	functional	Nagy V et al. Matrix metalloproteinase-9 is required for hippocampal late-phase long-term potentiation and memory. The Journal of neuroscience. Feb 2006, 26(7), 1923-1934. doi: 10.1523/JNEUROSCI.4359-05.2006
80	Pde4b	522.271	386.603	657.94	1.70185	0.767106	0.0229558	1	---	---	functional	Leroy J et al. Phosphodiesterase 4B in the cardiac L-type Ca 2+ channel complex regulates Ca 2+ current and protects against ventricular arrhythmias in mice. The Journal of clinical investigation. June 2011. doi:10.1172/JCI44747
81	Tbx3	19.3274	10.244	28.4108	2.77341	1.47166	0.024486	1	Wnt target gene	Wnt Homepage / Renard CA et al. Tbx3 is a downstream target of the Wnt/beta-catenin pathway and a critical mediator of beta-catenin survival functions in liver cancer. Cancer Res. 2007 Feb 1;67(3):901-10.	---	---
82	Chst9	143.327	118.793	167.86	1.41305	0.498809	0.0246015	1	---	---	---	---
83	Ttr	18900.9	16669.7	21132.1	1.2677	0.342211	0.0248768	1	---	---	functional	Hou X et al. Transthyretin oligomers induce calcium influx via voltage‐gated calcium channels. Journal of neurochemistry, 25 August 2006. DOI: 10.1111/j.1471-4159.2006.04210.x
84	Ptar1	226.409	138.06	314.757	2.27985	1.18894	0.0253209	1	---	---	---	---
85	Arx	826.569	672.617	980.521	1.45777	0.543765	0.0254122	1	---	---	---	---
86	Ripk2	454.344	357.797	550.891	1.53967	0.622626	0.0256537	1	---	---	---	---
87	Lgr4	2369.95	1990.59	2749.31	1.38115	0.465875	0.0272182	1	functional	Glinka A et al. LGR4 and LGR5 are R-spondin receptors mediating Wnt/_-catenin and Wnt/PCP signalling. EMBO Rep. 2011 Sep 30;12(10):1055-61. doi: 10.1038/embor.2011.175.	---	---
88	Rbm47	64.8295	48.6849	80.9741	1.66323	0.733987	0.0281036	1	---	---	---	---
89	Tshz3	147.856	112.352	183.361	1.63203	0.706663	0.0285401	1	---	---	---	---
90	Acat2	3202.83	3466.52	2939.14	0.847863	-0.238097	0.0288401	1	---	---	---	---
91	Tnr	648.909	435.258	862.561	1.98172	0.986755	0.0290531	1	---	---	---	---
92	RGD1310110	246.319	199.871	292.767	1.46478	0.550684	0.0290744	1	---	---	---	---
93	Mamdc4	118.403	140.03	96.7771	0.691117	-0.532998	0.0292261	1	---	---	---	---
94	Asap3	267.031	194.745	339.316	1.74236	0.801041	0.0296135	1	---	---	functional	Ismail S. A. et al. The structure of an Arf-ArfGAP complex reveals a Ca 2+ regulatory mechanism. Cell, 28 May 2010. 141(5), 812-821. DOI: http://dx.doi.org/10.1016/j.cell.2010.03.051
95	Lck	84.9341	107.232	62.6366	0.584124	-0.775653	0.0298783	1	---	---	functional	Harr M. W. et al. Inhibition of Lck enhances glucocorticoid sensitivity and apoptosis in lymphoid cell lines and in chronic lymphocytic leukemia. Cell Death & Differentiation, March 2010. doi:10.1038/cdd.2010.25
96	Bach2	441.524	294.328	588.721	2.00022	1.00016	0.0300128	1	---	---	---	---
97	Boc	733.312	584.245	882.378	1.51029	0.594824	0.030159	1	---	---	---	---
98	Resp18	371.405	301.27	441.539	1.46559	0.551483	0.0306324	1	---	---	---	---
99	Cckbr	107.513	86.6801	128.346	1.48068	0.566262	0.0308873	1	---	---	Direct	KEGG Pathway hsa04020
100	Metazoa_SRP	8.71622	4.94876	12.4837	2.52259	1.33491	0.0312358	1	---	---	---	---
101	Synm	2538.44	2104.71	2972.16	1.41214	0.497887	0.0317201	1	---	---	---	---
102	Arid5b	441.02	342.789	539.251	1.57313	0.653634	0.0319733	1	---	---	---	---
103	Acer2	28.3474	20.2784	36.4164	1.79582	0.844646	0.0320462	1	---	---	functional	Sun W et al. Substrate specificity, membrane topology, and activity regulation of human alkaline ceramidase 2 (ACER2). Journal of Biological Chemistry, jan 2010. doi: 10.1074/jbc.M109.069203
104	Wfikkn2	182.128	163.098	201.157	1.23335	0.302581	0.0320888	1	---	---	---	---
105	AABR07001555.1	19.8433	13.0079	26.6787	2.05096	1.0363	0.0323334	1	---	---	---	---
106	Mvk	976.421	1044.9	907.939	0.868921	-0.202703	0.0325953	1	---	---	---	---
107	Map3k8	21.7276	15.7325	27.7227	1.76213	0.817319	0.0327933	1	---	---	---	---
108	Fut9	92.2617	66.0504	118.473	1.79368	0.84292	0.0330004	1	---	---	---	---
109	Blnk	61.8989	42.4723	81.3254	1.91479	0.937185	0.033176	1	---	---	---	---
110	Kcnn3	488.596	370.379	606.813	1.63836	0.71225	0.0333772	1	---	---	---	---
111	Cysrt1	20.7903	30.6538	10.9267	0.356456	-1.4882	0.0333775	1	---	---	---	---
112	Tnfaip3	302.879	182.815	422.944	2.31351	1.21008	0.0335486	1	Wnt target gene	Jiang H et al. Short hairpin RNA targeting beta-catenin suppresses cell proliferation and induces apoptosis in human gastric carcinoma cells. Scand J Gastroenterol. 2009;44(12):1452-62. doi: 10.3109/00365520903342166.	---	---
113	AABR07063462.1	120.758	22.5748	218.941	9.69846	3.27776	0.033694	1	---	---	---	---
114	Foxo1	972.927	744.866	1200.99	1.61235	0.689168	0.0337281	1	functional	Essers MA et al. Functional interaction between beta-catenin and FOXO in oxidative stress signaling. Science. 2005 May 20;308(5725):1181-4.	functional	Ozcan L et al. Calcium signaling through CaMKII regulates hepatic glucose production in fasting and obesity. Cell metabolism, May 2012. DOI: http://dx.doi.org/10.1016/j.cmet.2012.03.002
115	SNORD115	24.8912	15.151	34.6314	2.28576	1.19267	0.0339597	1	---	---	---	---
116	AABR07063425.2	1400.16	235.866	2564.45	10.8725	3.44261	0.0349984	1	---	---	---	---
117	Ston2	663.946	382.801	945.091	2.46888	1.30386	0.0354902	1	---	---	---	---
118	Btbd11	286.547	237.801	335.294	1.40998	0.495672	0.0356198	1	---	---	---	---
119	Slc4a5	273.578	229.228	317.927	1.38694	0.471909	0.0359017	1	---	---	---	---
120	Ttll13	106.709	80.8822	132.535	1.63862	0.712479	0.0359617	1	---	---	---	---
121	Prodh2	91.9886	111.914	72.0636	0.643921	-0.635046	0.0361643	1	---	---	---	---
122	Ubn2	482.81	338.004	627.616	1.85683	0.892842	0.0361717	1	---	---	---	---
123	Arc	426.889	373.688	480.091	1.28474	0.361474	0.0365762	1	---	---	functional	Bramham C. R. et al. The immediate early gene arc/arg3. 1: regulation, mechanisms, and function. The Journal of Neuroscience, Nov 2008.doi: 10.1523/JNEUROSCI.3864-08.2008
124	Gbx2	10.9592	5.79173	16.1267	2.78444	1.47738	0.0367485	1	Wnt target gene	Wnt Homepage / Li B et al. The posteriorizing gene Gbx2 is a direct target of Wnt signalling and the earliest factor in neural crest induction. Development. 2009 Oct;136(19):3267-78. doi: 10.1242/dev.036954.	---	---
125	Akna	572.418	472.743	672.093	1.42169	0.507604	0.0369766	1	---	---	---	---
126	Met	433.528	287.039	580.016	2.02069	1.01485	0.0371929	1	Wnt target gene	Wnt Homepage	functional	Gomes D. A. et al. c-Met must translocate to the nucleus to initiate calcium signals. Journal of Biological Chemistry, December 11, 2007. doi: 10.1074/jbc.M706550200
127	Slc6a13	289.872	456.525	123.219	0.269907	-1.88947	0.0375908	1	---	---	---	---
128	Fezf2	1545.25	1211.4	1879.1	1.55118	0.633366	0.0376408	1	functional	Zhang S et al. Fezf2 promotes neuronal differentiation through localised activation of Wnt/_-catenin signalling during forebrain development. Development. 2014 Dec;141(24):4794-805. doi: 10.1242/dev.115691.	---	---
129	AABR07068587.1	47.1068	30.5012	63.7124	2.08885	1.06271	0.0379517	1	---	---	---	---
130	Gabpb2	49.2877	35.798	62.7774	1.75366	0.810368	0.0382943	1	---	---	---	---
131	Aff1	354.836	265.568	444.104	1.67228	0.741816	0.0386864	1	---	---	---	---
132	Ebp	315.825	347.054	284.597	0.820036	-0.28624	0.0387283	1	---	---	---	---
133	Rif1	396.212	306.907	485.518	1.58197	0.661726	0.0389209	1	---	---	---	---
134	AABR07044049.1	67.9747	44.9018	91.0476	2.02771	1.01985	0.0392074	1	---	---	---	---
135	Fam63b	639.746	504.898	774.593	1.53416	0.617447	0.0394224	1	---	---	---	---
136	Aqp1	424.908	385.755	464.061	1.20299	0.266628	0.0398458	1	---	---	functional	Chatrchyan S et al. Observation of a new boson at a mass of 125 GeV with the CMS experiment at the LHC. Physics Letters B, 2014 Oct. doi: 10.3109/00016357.2013.879995
137	Mab21l1	14.1194	9.98613	18.2526	1.8278	0.870107	0.0408397	1	---	---	---	---
138	Inpp5f	1598.11	1401.02	1795.2	1.28135	0.357667	0.0409648	1	---	---	---	---
139	Id4	1555.72	1252.8	1858.65	1.4836	0.569105	0.0411614	1	functional	Ahuja S et al. Id4 functions downstream of Bmp signaling to restrict TCF function in endocardial cells during atrioventricular valve development. Dev Biol. 2016 Apr 1;412(1):71-82. doi: 10.1016/j.ydbio.2016.02.003.	Calcium target	Yang B, et al. Experimental identification of drugs with function of targeted up-regulating ID4 expression: bioinformatics-based prediction and preliminary validation. Zhonghua yi xue za zhi, 2009 Jun 23. PMID: 19957534
140	Ccdc122	25.7487	19.1677	32.3297	1.68668	0.754185	0.0412705	1	---	---	---	---
141	Cabp7	2150.69	2279.88	2021.51	0.886677	-0.173519	0.0414529	1	---	---	functional	McCue HV et al. Solution NMR structure of the Ca2+-bound N-terminal domain of CaBP7: a regulator of golgi trafficking. J Biol Chem. 2012 Nov 2;287(45):38231-43. doi: 10.1074/jbc.M112.402289.
142	Nefh	972.823	1089.23	856.411	0.78625	-0.346939	0.0414643	1	---	---	---	---
143	Arhgef5	68.0515	55.4322	80.6707	1.4553	0.541321	0.041671	1	---	---	---	---
144	Neurog2	108.945	88.0288	129.861	1.47521	0.560919	0.0426142	1	Wnt target gene	Qu Q et al. Wnt7a regulates multiple steps of neurogenesis. Mol Cell Biol. 2013 Jul;33(13):2551-9. doi: 10.1128/MCB.00325-13.	---	---
145	Gli3	508.894	355.785	662.002	1.86068	0.895828	0.0426142	1	Wnt target gene	Alvarez-Medina R et al. Wnt canonical pathway restricts graded Shh/Gli patterning activity through the regulation of Gli3 expression. Development. 2008 Jan;135(2):237-47.	---	---
146	Maml2	450.017	332.468	567.567	1.70713	0.771576	0.0431229	1	---	---	---	---
147	Trpc6	511.184	369.181	653.188	1.76929	0.823169	0.0432978	1	Wnt target gene	Li Z, et al. Wnt/_-catenin signalling pathway mediates high glucose induced cell injury through activation of TRPC6 in podocytes. Cell Prolif. 2013 Feb;46(1):76-85. doi: 10.1111/cpr.12010.	---	---
148	Fdps	11109	12463.3	9754.75	0.782676	-0.353512	0.0434467	1	---	---	---	---
149	Gpcpd1	1747.18	1345.02	2149.33	1.59799	0.676256	0.0440393	1	---	---	---	---
150	Cidec	100.053	107.998	92.1084	0.852873	-0.229597	0.044168	1	---	---	---	---
151	Six4	25.4039	18.2686	32.5391	1.78115	0.832809	0.0442502	1	---	---	---	---
152	Vat1l	2912.31	2521.48	3303.15	1.31001	0.389573	0.0442829	1	---	---	---	---
153	Gtf2a1	816.747	645.388	988.105	1.53103	0.614499	0.0443918	1	---	---	---	---
154	Zc3h12c	278.599	197.553	359.645	1.8205	0.864334	0.0450436	1	---	---	---	---
155	Cnot6l	626.474	500.472	752.477	1.50353	0.588358	0.0452062	1	---	---	---	---
156	Mdm4	521.17	381.327	661.013	1.73345	0.793651	0.0455127	1	---	---	functional	Colacurcio D. J. et al. Caspase-dependent degradation of MDMx/MDM4 cell cycle regulatory protein in amyloid β-induced neuronal damage. Neuroscience letters, 16 November 2015. http://dx.doi.org/10.1016/j.neulet.2015.10.031
157	LOC102554591	996.789	761.932	1231.65	1.61648	0.692855	0.0456942	1	---	---	---	---
158	Tox	79.7867	52.4712	107.102	2.04116	1.02939	0.045788	1	---	---	---	---
159	Rhov	542.612	615.087	470.137	0.764343	-0.387707	0.046117	1	Wnt target gene	Guemar L et al. The small GTPase RhoV is an essential regulator of neural crest induction in Xenopus. Dev Biol. 2007 Oct 1;310(1):113-28.	---	---
160	Scube3	94.3621	76.1708	112.553	1.47765	0.5633	0.0464015	1	---	---	---	---
161	Fryl	1911.25	1450.9	2371.61	1.63458	0.708918	0.0469369	1	---	---	---	---
162	Igf1r	593.098	435.425	750.772	1.72423	0.785951	0.0471541	1	Wnt target gene	Singh R et al. LRP6 enhances glucose metabolism by promoting TCF7L2-dependent insulin receptor expression and IGF receptor stabilization in humans. Cell Metab. 2013 Feb 5;17(2):197-209. doi: 10.1016/j.cmet.2013.01.009.	functional	Gazit N et al. Igf-1 receptor differentially regulates spontaneous and evoked transmission via mitochondria at hippocampal synapses. Neuron, January 21, 2016. DOI: http://dx.doi.org/10.1016/j.neuron.2015.12.034
163	Mid1	1332.16	1130.35	1533.97	1.35708	0.440504	0.0472086	1	---	---	functional	Wang Y et al. Genetic interactions between the Golgi Ca2+/H+ exchanger Gdt1 and the plasma membrane calcium channel Cch1/Mid1 in the regulation of calcium homeostasis, stress response and virulence in Candida albicans. FEMS Yeast Res. 2015 Nov; doi: 10.1093/femsyr/fov069
164	Gabrg1	535.989	463.878	608.099	1.3109	0.39056	0.047656	1	---	---	---	---
165	Pcp4	4759.65	5357.01	4162.29	0.77698	-0.36405	0.0480104	1	---	---	functional	Kim EE et al. PCP4 regulates Purkinje cell excitability and cardiac rhythmicity. J Clin Invest. 2014 Nov. doi: 10.1172/JCI77495.
166	Orai2	2004.81	2154.47	1855.16	0.861073	-0.215793	0.0483936	1	---	---	functional	DeHaven WI et al. Calcium inhibition and calcium potentiation of Orai1, Orai2, and Orai3 calcium release-activated calcium channels. J Biol Chem. 2007 Jun 15. PMID: 17452328
167	Spef1	454.846	525.482	384.209	0.731156	-0.451749	0.0486411	1	---	---	---	---
168	Fat1	7005.64	5720.73	8290.54	1.44921	0.535267	0.048711	1	functional	Morris LG et al. Recurrent somatic mutation of FAT1 in multiple human cancers leads to aberrant Wnt activation. Nat Genet. 2013 Mar;45(3):253-61. doi: 10.1038/ng.2538.	---	---
169	Grm3	407.641	342.707	472.574	1.37895	0.463566	0.0490002	1	---	---	functional	Lyon L et al. Hippocampal mossy fiber long-term depression in Grm2/3 double knockout mice. Synapse. 2011 Sep. doi: 10.1002/syn.20923.
170	Narf	2619.28	2750.7	2487.87	0.904448	-0.144891	0.0491465	1	functional	Yamada M et al. NARF, an nemo-like kinase (NLK)-associated ring finger protein regulates the ubiquitylation and degradation of T cell factor/lymphoid enhancer factor (TCF/LEF). J Biol Chem. 2006 Jul 28;281(30):20749-60.	---	---
	Zdbf2	1877.4	1337.51	2417.29	1.8073	0.853838	0.0507941	1
	Tgif1	666.58	535.291	797.868	1.49053	0.575827	0.0511984	1
	Dock5	107.89	81.8692	133.911	1.63568	0.709887	0.0513609	1
	Bcar3	536.913	439.12	634.707	1.44541	0.531475	0.0515024	1
	Pamr1	227.541	209.38	245.701	1.17347	0.230782	0.0516637	1
	Tmem97	1181.25	1370.65	991.842	0.723628	-0.466681	0.0520777	1
	Kcng3	18.6139	9.26095	27.9669	3.01987	1.59449	0.0520945	1
	Id3	2113.53	1790.23	2436.84	1.36119	0.44487	0.0520955	1
	Ier5	1077.27	998.266	1156.27	1.15827	0.211977	0.0521189	1
	Kcnj2	25.5779	15.2593	35.8963	2.35242	1.23414	0.0522451	1
	Ccnt2	1166.42	899.635	1433.21	1.5931	0.671833	0.0523082	1
	Chrm2	17.3283	8.65756	25.9991	3.00305	1.58643	0.0523857	1
	Fgd6	313.232	218.831	407.632	1.86277	0.897451	0.052605	1
	LOC501033	32.7216	18.9053	46.5379	2.46163	1.29961	0.0527528	1
	Shb	443.962	411.876	476.047	1.1558	0.208894	0.0528188	1
	Cxcl1	343.038	114.243	571.833	5.00541	2.32349	0.0529873	1
	Kcnn1	853.299	890.697	815.901	0.916026	-0.12654	0.0533456	1
	Acss2	3064.37	3351.61	2777.12	0.828593	-0.271264	0.0537233	1
	RGD1564942	12.6832	8.7073	16.6591	1.91323	0.936009	0.0537657	1
	Mir132	18.6698	14.2203	23.1194	1.6258	0.701148	0.0539072	1
	Etv6	203.076	151.511	254.64	1.68067	0.749034	0.0541487	1
	Ddx6	616.319	484.024	748.614	1.54665	0.629145	0.054378	1
	Kiz	210.75	247.148	174.351	0.705454	-0.503375	0.0550142	1
	Arhgap31	772.194	591.081	953.308	1.61282	0.689587	0.0552852	1
	Coro6	18.5414	10.8344	26.2484	2.42269	1.27661	0.0553446	1
	Ifnar1	4950.7	4119.74	5781.67	1.40341	0.488932	0.055925	1
	Tll1	465.566	360.531	570.6	1.58266	0.662355	0.0561463	1
	Ralgapa2	413.275	308.881	517.669	1.67595	0.744979	0.0562142	1
	Kcna4	705.759	595.559	815.959	1.37007	0.454253	0.0562404	1
	Tes	1040.59	818.197	1262.99	1.54363	0.626325	0.0565865	1
	Gfra1	1107.85	975.601	1240.09	1.27111	0.346086	0.0567988	1
	Col27a1	222.85	189.45	256.25	1.3526	0.435734	0.0570404	1
	Cox6b2	28.7573	43.3097	14.2049	0.327983	-1.60831	0.0572049	1
	Igsf9b	345.138	247.024	443.251	1.79436	0.84347	0.0575323	1
	Tyrp1	123.662	97.2391	150.086	1.54347	0.62618	0.0576293	1
	Pcdh7	784.794	624.489	945.099	1.5134	0.597789	0.0577905	1
	Atxn1	1152.73	837.392	1468.06	1.75313	0.809935	0.0578241	1
	Utrn	716.389	621.785	810.993	1.3043	0.383274	0.0580242	1
	Pkn2	2556.02	1748.01	3364.03	1.92449	0.944476	0.0583573	1
	Reln	4705.41	3773.86	5636.96	1.49369	0.578877	0.0584455	1
	Fndc3a	1573.86	1222.15	1925.57	1.57557	0.655871	0.0585664	1
	Pim1	52.6644	43.2245	62.1044	1.43679	0.522845	0.0587135	1
	Plec	5342.51	4259.2	6425.81	1.50869	0.593298	0.0587228	1
	Porf1	160.478	106.342	214.615	2.01816	1.01304	0.059538	1
	Slco1c1	1402.86	1203.43	1602.29	1.33144	0.412984	0.0598892	1
	Ppt2	682.347	638.001	726.692	1.13901	0.187784	0.0604847	1
	Cnnm1	931.908	782.06	1081.76	1.38321	0.468023	0.0610917	1
	Cdh6	336.248	256.535	415.96	1.62145	0.697287	0.061196	1
	Sntb2	59.3205	47.295	71.3459	1.50853	0.593143	0.061233	1
	Rnft1	193.865	168.067	219.663	1.307	0.386256	0.0615774	1
	RGD1309821	308.476	245.316	371.636	1.51493	0.59925	0.0622516	1
	AABR07026197.1	71.8263	87.3572	56.2954	0.644427	-0.633911	0.0622569	1
	Pdzrn3	1276.2	1122.59	1429.82	1.27369	0.34901	0.0626262	1
	Pign	362.988	290.959	435.017	1.49512	0.580258	0.062779	1
	LOC498368	256.383	214.25	298.515	1.3933	0.478504	0.0629414	1
	Gabrg3	85.5758	60.9931	110.159	1.80608	0.852862	0.0632674	1
	Sh3bgr	126.925	107.87	145.98	1.3533	0.436482	0.0636548	1
	Hrct1	15.6119	25.099	6.12478	0.244025	-2.0349	0.0639318	1
	Inhba	27.6355	21.7026	33.5684	1.54675	0.629236	0.0648258	1
	Dhrs9	17.4121	11.2927	23.5315	2.08378	1.0592	0.0650042	1
	Phlda1	1669.83	1263.67	2076	1.64284	0.716194	0.0651558	1
	Tgfb2	2277.53	2087.67	2467.38	1.18188	0.241085	0.066498	1
	Slc34a2	11.7085	5.20044	18.2166	3.50289	1.80855	0.0666926	1
	Idh1	6135.46	6885.7	5385.21	0.782086	-0.354601	0.0677833	1
	Malt1	174.714	140.194	209.233	1.49246	0.577689	0.068008	1
	Rab33a	655.668	776.586	534.749	0.688589	-0.538285	0.0686814	1
	Sertad2	138.042	110.472	165.612	1.49913	0.584129	0.0687849	1
	Lcat	866.076	753.45	978.703	1.29896	0.377358	0.0688744	1
	Arrdc3	466.78	353.526	580.034	1.64071	0.714322	0.0688877	1
	Zfp618	114.366	82.7512	145.981	1.76409	0.818925	0.069002	1
	Tctex1d1	17.316	25.6697	8.96224	0.349136	-1.51814	0.0693309	1
	Tnc	6269.87	4896.21	7643.53	1.56111	0.642573	0.0693792	1
	Rn60_X_0635.2	697.129	770.442	623.816	0.809686	-0.304566	0.0695029	1
	Mcc	121.799	92.0203	151.578	1.64722	0.720037	0.0699119	1
	Crebrf	534.181	457.065	611.298	1.33744	0.419477	0.0699702	1
	Plscr1	35.8034	27.2108	44.3961	1.63157	0.706257	0.0703762	1
	AABR07001634.1	15.1643	10.0864	20.2423	2.00689	1.00496	0.0709047	1
	Mesp1	10.201	16.3404	4.06152	0.248557	-2.00835	0.0711604	1
	Ifitm10	272.865	230.265	315.465	1.37001	0.454186	0.0712567	1
	Foxn3	451.457	351.072	551.843	1.57188	0.652493	0.071921	1
	Sema6a	2064.31	1790.36	2338.26	1.30603	0.385183	0.0720772	1
	Leng9	81.2715	71.3949	91.1482	1.27668	0.352392	0.0724298	1
	Thbs4	25.9989	36.2462	15.7515	0.434569	-1.20234	0.0724961	1
	Myo1f	55.9994	46.2426	65.7563	1.42199	0.507909	0.0730686	1
	Klhdc7a	57.4745	51.2242	63.7248	1.24404	0.315031	0.0731291	1
	Ubd	33.1701	51.8522	14.4879	0.279408	-1.83955	0.0734152	1
	Prkag1	5315.64	4417.3	6213.98	1.40674	0.492351	0.073604	1
	AABR07012475.2	33.6541	24.6127	42.6954	1.73469	0.794675	0.0738984	1
	H6pd	264.459	212.013	316.905	1.49474	0.579894	0.0741764	1
	Dok4	1314.55	1449.08	1180.02	0.814324	-0.296326	0.0744611	1
	Mroh1	1447.12	1292.46	1601.78	1.23933	0.309563	0.0745314	1
	Med13	2225.72	1756.65	2694.79	1.53405	0.617346	0.074675	1
	Mfsd4	97.8421	72.5638	123.12	1.69672	0.762747	0.0746759	1
	Adamts1	3631.55	1802.54	5460.55	3.02936	1.59901	0.0747013	1
	Mitf	206.71	163.599	249.821	1.52703	0.610724	0.07472	1
	Tmem132b	786.416	631.958	940.874	1.48882	0.574174	0.074752	1
	Ncan	26017.2	20827.8	31206.6	1.49832	0.583343	0.0748716	1
	Wnt4	1693.08	1795.28	1590.88	0.886151	-0.174375	0.0748831	1
	Rora	53.8953	40.2193	67.5713	1.68007	0.748521	0.0752119	1
	Klhl3	171.248	127.552	214.944	1.68515	0.752881	0.0754083	1
	Nfkb1	1162.09	949.252	1374.93	1.44843	0.534493	0.0754091	1
	Atxn7	179.182	137.846	220.518	1.59975	0.677846	0.0754317	1
	Plekhh2	383.094	315.399	450.789	1.42927	0.515274	0.0758193	1
	Bend3	121.8	96.3932	147.207	1.52715	0.610839	0.0760834	1
	Jup	2731.09	3030.75	2431.42	0.802251	-0.317875	0.0761444	1
	Ccl20	254.359	64.1998	444.517	6.92397	2.7916	0.0761617	1
	Hes6	3308.12	3730.58	2885.67	0.773518	-0.370493	0.0765784	1
	Cers4	974.961	783.336	1166.59	1.48925	0.574589	0.0765904	1
	Oprm1	21.4475	10.4059	32.4891	3.12218	1.64255	0.076705	1
	LOC100909555	1678.49	348.336	3008.65	8.63722	3.11057	0.0769175	1
	LOC102547897	49.8214	34.9097	64.733	1.8543	0.890875	0.0770567	1
	Col6a6	63.4445	51.449	75.4399	1.4663	0.552184	0.0771195	1
	Zbtb37	72.2077	49.4135	95.002	1.92259	0.943053	0.0771765	1
	Sec24a	707.126	573.371	840.881	1.46656	0.552433	0.0771784	1
	Il1b	74.2615	21.5827	126.94	5.88159	2.55621	0.0778079	1
	Zic5	208.813	165.857	251.769	1.51798	0.602157	0.0778705	1
	Cpped1	135.858	124.825	146.891	1.17678	0.234845	0.0784286	1
	Dram1	57.8727	47.766	67.9793	1.42317	0.509111	0.0787953	1
	Zfp827	317.403	232.56	402.246	1.72965	0.790476	0.0788149	1
	LOC691920	378.324	280.599	476.049	1.69655	0.762602	0.0788396	1
	Rorb	133.902	107.609	160.195	1.48868	0.574033	0.07927	1
	Id1	534.734	484.631	584.836	1.20677	0.271147	0.0795058	1
	Hectd2	1661.03	1360.93	1961.13	1.44103	0.527096	0.0796549	1
	Chd7	582.094	507.966	656.222	1.29186	0.369453	0.0798733	1
	Muc6	29.2736	20.7219	37.8254	1.82538	0.868194	0.0799796	1
	Cfap53	110.484	132.947	88.022	0.662083	-0.594915	0.0803727	1
	Hcrt	29.9008	46.9103	12.8914	0.27481	-1.86349	0.080432	1
	Zbtb7c	288.699	256.079	321.318	1.25476	0.327413	0.0805533	1
	Scarf1	18.1098	26.2674	9.95229	0.378884	-1.40017	0.0808878	1
	AABR07001068.1	174.485	141.707	207.263	1.46262	0.548552	0.0811598	1
	Pygl	107.494	126.654	88.3332	0.697437	-0.519865	0.0811687	1
	Abcb1a	831.333	649.505	1013.16	1.5599	0.641451	0.0813052	1
	Lrrc29	19.9124	16.1815	23.6432	1.46113	0.54708	0.0813158	1
	Primpol	38.982	31.0597	46.9043	1.51013	0.594677	0.0817984	1
	Cpm	220.264	176.791	263.737	1.4918	0.577054	0.0818023	1
	Mdn1	2015.15	1670.22	2360.07	1.41303	0.498792	0.0819701	1
	Slc12a2	2749.71	2339.1	3160.32	1.35108	0.434116	0.0824843	1
	AABR07021558.1	61.1694	45.5044	76.8344	1.68851	0.755747	0.0824891	1
	AABR07063425.1	324.896	65.2376	584.555	8.9604	3.16356	0.082552	1
	Slc35d1	572.661	526.968	618.355	1.17342	0.23072	0.0827078	1
	Zfp217	311.72	241.366	382.073	1.58296	0.662625	0.0830482	1
	Mogat3	15.1813	21.4064	8.95615	0.418387	-1.25709	0.0830551	1
	Tiparp	475.908	427.987	523.829	1.22394	0.29153	0.0833836	1
	Kctd19	32.2791	27.2172	37.341	1.37197	0.456245	0.0836167	1
	Dnhd1	137.224	99.6256	174.822	1.75479	0.811295	0.0836685	1
	Lpcat2	103.428	91.9023	114.953	1.25082	0.322877	0.0841171	1
	Col14a1	77.3328	66.7564	87.9092	1.31687	0.397108	0.0841376	1
	Cdk12	1207.8	1013.28	1402.32	1.38394	0.468777	0.0842478	1
	Htra4	98.6272	73.2047	124.05	1.69456	0.760911	0.0844269	1
	Serpinb2	69.0609	53.3663	84.7555	1.58818	0.667377	0.0844889	1
	Hook3	290.746	240.602	340.891	1.41683	0.502664	0.0847689	1
	Frem3	54.5294	40.4861	68.5728	1.69374	0.760209	0.0847937	1
	MGC116202	2779.96	3076.02	2483.89	0.807504	-0.308459	0.0849223	1
	Rapgef6	341.16	273.962	408.358	1.49056	0.575855	0.0849333	1
	Adcy7	35.1947	24.644	45.7455	1.85626	0.892397	0.0850798	1
	Rassf2	1341.4	1177.36	1505.44	1.27866	0.354631	0.0853828	1
	LOC100912697	269.408	199.804	339.012	1.69672	0.762751	0.085411	1
	Nfkbia	1254.63	1069.97	1439.3	1.34518	0.4278	0.0856267	1
	Zfhx3	113.555	83.1461	143.963	1.73145	0.791982	0.0856438	1
	Tshz2	371.305	256.659	485.95	1.89337	0.920954	0.0856746	1
	Rab32	502.764	342.832	662.696	1.933	0.950843	0.0857639	1
	Foxn2	598.424	506.13	690.718	1.36471	0.448589	0.0858171	1
	AABR07033020.1	11.3782	15.3914	7.36512	0.478523	-1.06334	0.0860964	1
	Man1a1	771.25	703.778	838.723	1.19174	0.253074	0.086148	1
	Tecr	7612.49	8243.26	6981.72	0.846961	-0.239632	0.0871821	1
	Soat1	732.729	628.244	837.215	1.33263	0.414274	0.0875579	1
	Muc15	26.52	14.7945	38.2454	2.58511	1.37023	0.0882171	1
	Hmcn1	81.3952	65.627	97.1634	1.48054	0.566123	0.088316	1
	Phip	799.94	593.144	1006.74	1.69729	0.76323	0.088399	1
	Crim1	1053.33	821.47	1285.18	1.56449	0.64569	0.0885469	1
	N4bp2	395.262	312.708	477.815	1.52799	0.611638	0.0886399	1
	Otx1	143.644	121.258	166.03	1.36923	0.453369	0.088705	1
	Pde3a	446.59	354.481	538.699	1.51968	0.603772	0.0889127	1
	Rock1	1732.35	1403.12	2061.57	1.46928	0.555104	0.0893723	1
	Rn60_1_0959.1	50.3619	35.2846	65.4393	1.85461	0.891118	0.089467	1
	Tjp1	4196.04	3554.08	4837.99	1.36125	0.444932	0.0900524	1
	AABR07072539.3	11.691	17.3791	6.00285	0.345407	-1.53363	0.0910238	1
	Stac	48.4141	35.8463	60.9817	1.7012	0.766552	0.0910684	1
	Arsa	1383.52	1290.81	1476.23	1.14365	0.193643	0.0913962	1
	Junb	1282.24	1104.08	1460.39	1.32273	0.403514	0.0914471	1
	Stxbp6	185.463	144.963	225.964	1.55877	0.640408	0.0920756	1
	Shroom4	139.899	120.95	158.847	1.31332	0.393221	0.0925133	1
	AABR07015067.1	206.401	49.8074	362.994	7.28796	2.86551	0.092562	1
	Irg1	84.7657	27.9493	141.582	5.06567	2.34075	0.0925724	1
	Nfia	1932.36	1582.17	2282.55	1.44267	0.52874	0.0927171	1
	Flnb	781.076	648.429	913.723	1.40913	0.494808	0.0928433	1
	Msi2	791.344	666.355	916.333	1.37514	0.45958	0.0930537	1
	Sox6	265.296	194.009	336.584	1.73489	0.794841	0.0938097	1
	Oaf	1465.61	1261.71	1669.51	1.32321	0.404039	0.0939676	1
	LOC100910839	481.756	424.97	538.542	1.26725	0.341699	0.0940599	1
	Casp8	29.5238	24.9051	34.1425	1.3709	0.455128	0.0942332	1
	Apln	348.827	291.472	406.182	1.39355	0.478767	0.0943957	1
	Lpp	81.9722	56.634	107.311	1.89481	0.92205	0.094629	1
	Ttc21b	367.826	322.712	412.941	1.27959	0.355686	0.0951218	1
	Npr3	221.434	178.121	264.746	1.48632	0.57175	0.0953304	1
	Cldn11	63.3959	98.674	28.1178	0.284956	-1.81119	0.095395	1
	Hps1	169.542	159.386	179.699	1.12745	0.173066	0.0954949	1
	AABR07015057.1	2493.58	620.47	4366.69	7.03772	2.81511	0.0955431	1
	Gria3	1348.16	1098.3	1598.02	1.45499	0.54101	0.0959561	1
	LOC102551819	173.757	136.92	210.593	1.53807	0.62112	0.0960509	1
	Tifa	288.825	252.645	325.005	1.28641	0.363353	0.0964499	1
	Btn2a2	37.2971	32.1774	42.4167	1.31821	0.398583	0.0966327	1
	Kctd14	199.452	187.643	211.261	1.12587	0.171035	0.0968665	1
	Plcg2	89.4952	78.6691	100.321	1.27523	0.35076	0.0970129	1
	Prokr2	88.415	100.052	76.7775	0.767372	-0.382001	0.097015	1
	Cyp51	10825.9	11489.6	10162.2	0.884466	-0.177121	0.0972476	1
	Ptprm	861.792	767.08	956.505	1.24694	0.318396	0.0973393	1
	Xpr1	1380.62	1097.22	1664.03	1.51659	0.600833	0.0974377	1
	P2rx7	7.64598	3.94101	11.3509	2.88022	1.52618	0.0974427	1
	Cdh22	627.854	573.391	682.317	1.18997	0.250924	0.0977709	1
	Ptchd1	132.271	103.032	161.51	1.56758	0.64854	0.0981288	1
	AABR07001497.1	5519.24	5978.49	5060	0.846369	-0.240641	0.0985333	1
	Wnk1	4688.71	4196.02	5181.39	1.23483	0.304317	0.0985462	1
	Ptprt	588.88	407.273	770.486	1.89182	0.919774	0.0987551	1
	Igsf21	690.863	760.335	621.392	0.817262	-0.29113	0.0988974	1
	Igsf6	26.5312	13.3896	39.6728	2.96296	1.56704	0.0989077	1
	Crebbp	1988.9	1723.88	2253.92	1.30747	0.386782	0.0989151	1
	Dhcr24	7530.91	7746.45	7315.37	0.944352	-0.0826034	0.0993792	1
	Lmcd1	384.759	278.618	490.899	1.76191	0.817137	0.0995566	1
	Fxyd5	17.2817	11.8976	22.6659	1.90508	0.929852	0.0998092	1
	Slc38a1	1703.48	1337.41	2069.55	1.54743	0.629874	0.099859	1
	Grasp	203.993	176.368	231.617	1.31326	0.393152	0.100021	1
	Crh	26.1331	40.0068	12.2593	0.306432	-1.70636	0.100242	1
	Kcnq1	42.5234	32.7399	52.3069	1.59765	0.675952	0.100427	1
	Birc3	93.1203	63.5197	122.721	1.93202	0.950106	0.10097	1
	Nhlrc2	314.115	259.33	368.9	1.42251	0.508437	0.101022	1
	Nfkb2	561.673	426.99	696.357	1.63085	0.705625	0.101031	1
	Cacng6	56.7837	66.3932	47.1741	0.710527	-0.493039	0.101574	1
	Vldlr	1763.6	1483.84	2043.37	1.37708	0.461617	0.101956	1
	Slc4a7	1240.77	893.773	1587.76	1.77646	0.829009	0.102172	1
	Gjb2	138.344	221.113	55.5758	0.251346	-1.99225	0.10252	1
	Akap2	1285.3	998.893	1571.71	1.57345	0.653929	0.102648	1
	Pls1	114.823	97.7524	131.894	1.34926	0.432171	0.103068	1
	Gbp2	5178.11	4295.34	6060.88	1.41104	0.496756	0.103255	1
	Igf1	66.8876	42.4686	91.3065	2.14998	1.10432	0.103287	1
	Elmo3	113.591	95.4983	131.683	1.37891	0.463524	0.103315	1
	Icam1	1200.53	889.909	1511.15	1.6981	0.763918	0.103496	1
	Fubp3	879.213	780.062	978.363	1.25421	0.32678	0.103661	1
	Rxrg	876.203	940.909	811.497	0.86246	-0.21347	0.103661	1
	RGD1560175	807.63	626.577	988.684	1.57791	0.658018	0.103805	1
	Smad6	47.6767	42.5199	52.8334	1.24256	0.313311	0.103856	1
	Zfp26	432.499	337.615	527.382	1.56208	0.643469	0.10387	1
	Lrrc8c	1432.32	1280.09	1584.54	1.23783	0.307817	0.103924	1
	Antxr2	350.435	274.21	426.659	1.55596	0.637802	0.104182	1
	Adcy2	2365.23	2212.51	2517.95	1.13805	0.186567	0.104514	1
	Cux1	286.171	253.35	318.992	1.2591	0.332392	0.104523	1
	AABR07071697.1	21.0048	13.4797	28.5298	2.1165	1.08168	0.10472	1
	Doc2g	80.3318	75.4411	85.2224	1.12966	0.175884	0.104762	1
	Ass1	83.2024	62.6184	103.786	1.65744	0.728959	0.104908	1
	Ndnf	129.581	107.125	152.037	1.41925	0.505127	0.105054	1
	Trim63	11.9214	7.58409	16.2587	2.14379	1.10016	0.105436	1
	AABR07025757.1	240.047	178.615	301.48	1.68788	0.75521	0.105617	1
	Dgkh	77.0668	50.001	104.132	2.08261	1.05839	0.105695	1
	Gclc	3602.59	3340.62	3864.57	1.15684	0.210194	0.106163	1
	Clcn5	174.974	133.119	216.829	1.62883	0.703837	0.106433	1
	Abhd2	1215.69	967.017	1464.36	1.5143	0.598655	0.106733	1
	Jag1	476.921	393.105	560.738	1.42643	0.512414	0.106748	1
	AABR07062766.1	126.773	140.979	112.567	0.798464	-0.3247	0.107253	1
	Rtkn2	105.815	81.4093	130.22	1.59958	0.677689	0.107646	1
	Galnt3	146.777	113.665	179.889	1.58262	0.662313	0.107945	1
	Pkd2	1023.53	927.892	1119.17	1.20615	0.270404	0.108026	1
	Mir3597-1	9.88877	6.88058	12.897	1.8744	0.906429	0.108111	1
	Fzd7	214.399	188.595	240.203	1.27365	0.348969	0.108226	1
	B3galt5	400.698	405.8	395.597	0.974857	-0.0367381	0.108293	1
	Il11	38.5052	47.233	29.7775	0.630439	-0.665571	0.108605	1
	AABR07015081.2	1029.1	239.122	1819.07	7.60731	2.92739	0.108791	1
	Rc3h1	841.668	635.949	1047.39	1.64697	0.719813	0.109434	1
	Sel1l3	960.605	794.005	1127.21	1.41965	0.505531	0.109547	1
	Slc9a9	138.18	127.805	148.554	1.16235	0.217047	0.110027	1
	Hs3st6	8.50102	13.1484	3.85359	0.293084	-1.77062	0.110241	1
	Lif	115.367	89.6791	141.056	1.57289	0.653422	0.11048	1
	Cdk6	139.954	104.744	175.165	1.67231	0.741845	0.110551	1
	Nt5e	32.5723	23.1935	41.9511	1.80874	0.854986	0.110553	1
	Cdc42ep2	211.745	246.194	177.296	0.720148	-0.473635	0.110862	1
	RGD1561636	9.49822	7.27662	11.7198	1.61061	0.687609	0.110988	1
	RGD1561161	360.649	322.427	398.87	1.23709	0.306946	0.111069	1
	Plagl1	2065.28	1458.62	2671.94	1.83183	0.873289	0.11116	1
	Dmd	2017.29	1777.66	2256.93	1.2696	0.344379	0.111174	1
	Zfp954	356.359	405.925	306.792	0.755785	-0.403952	0.111322	1
	Lrrc15	25.7803	20.7956	30.765	1.4794	0.565009	0.112047	1
	Tph1	4.83431	2.55372	7.1149	2.78609	1.47824	0.1121	1
	Rgs5	44.2679	40.3617	48.1741	1.19356	0.255272	0.112712	1
	Rn60_5_0825.2	36.1361	46.0979	26.1742	0.567796	-0.816555	0.112719	1
	Prtg	102.183	78.4728	125.893	1.60429	0.681938	0.113002	1
	Nsdhl	3572.46	3645.12	3499.8	0.960132	-0.0586949	0.113125	1
	Pspn	53.3584	63.8453	42.8716	0.671491	-0.574559	0.113224	1
	Kdm5a	1612.09	1385.76	1838.43	1.32666	0.407798	0.113436	1
	AABR07052897.3	317.261	251.855	382.667	1.51939	0.603496	0.113441	1
	Acad11	480.934	452.206	509.662	1.12706	0.172561	0.113685	1
	Ikbkg	145.393	122.174	168.611	1.38009	0.464765	0.113838	1
	Cxcl6	113.924	23.3967	204.45	8.73841	3.12737	0.114171	1
	Pgr	33.8737	23.717	44.0304	1.85649	0.892579	0.114274	1
	Egr1	1080.64	856.073	1305.21	1.52465	0.608474	0.114765	1
	Rtp4	122.904	103.906	141.902	1.36567	0.44961	0.114837	1
	Otub2	970.774	1044.64	896.91	0.858586	-0.219966	0.115191	1
	Spata13	1431.01	1107.53	1754.49	1.58415	0.663709	0.115215	1
	LOC102551660	431.101	413.994	448.208	1.08264	0.114559	0.115311	1
	Rnf169	156.796	126.328	187.265	1.48237	0.56791	0.115392	1
	Tuft1	198.726	178.415	219.036	1.22768	0.295929	0.115515	1
	Lmo1	2213.05	2316.15	2109.94	0.910966	-0.134531	0.115682	1
	Edem1	816.6	698.387	934.813	1.33853	0.420651	0.115805	1
	Hrh2	16.0173	9.37048	22.664	2.41866	1.27421	0.115833	1
	Tox2	292.368	228.554	356.181	1.55841	0.640075	0.116069	1
	Pdgfd	191.983	178.91	205.056	1.14614	0.196787	0.11626	1
	Zdhhc21	504.775	378.987	630.563	1.66381	0.734494	0.116449	1
	Cyct	67.8383	59.7453	75.9313	1.27092	0.345868	0.116657	1
	Etv3	772.309	629.751	914.867	1.45274	0.53878	0.116767	1
	Eva1a	41.6167	36.6701	46.5633	1.26979	0.344591	0.116785	1
	Zfp423	831.778	768.37	895.187	1.16505	0.220388	0.116897	1
	Stt3b	2827.78	2446.81	3208.76	1.3114	0.391111	0.117334	1
	Nnmt	51.7409	67.4135	36.0682	0.53503	-0.902309	0.117498	1
	Pik3ap1	161.141	121.529	200.753	1.65188	0.724113	0.117666	1
	Il17rb	107.942	94.2931	121.59	1.28949	0.366798	0.118008	1
	Morn4	1594.9	1732.85	1456.96	0.840788	-0.250185	0.118173	1
	Cdc25c	229.643	271.564	187.722	0.691264	-0.532691	0.118508	1
	Nrg1	369.995	300.168	439.821	1.46525	0.551146	0.118759	1
	Psd4	19.3345	13.5216	25.1473	1.85978	0.895131	0.118822	1
	Acsm5	74.8757	70.4062	79.3452	1.12696	0.17244	0.118996	1
	Fbxo32	165.025	123.518	206.531	1.67207	0.741637	0.119104	1
	Arhgef6	106.237	88.7064	123.767	1.39524	0.480512	0.119632	1
	Gbp5	766.02	404.098	1127.94	2.79126	1.48092	0.119717	1
	Lonrf3	471.241	441.767	500.715	1.13344	0.180705	0.119897	1
	Mecom	27.0968	32.1587	22.0349	0.685192	-0.54542	0.120081	1
	Sp4	405.418	316.503	494.333	1.56186	0.643266	0.120348	1
	Gpr21	9.43304	4.71289	14.1532	3.00308	1.58644	0.120417	1
	Relb	342.02	273.612	410.428	1.50004	0.584997	0.120432	1
	AABR07050265.1	89.4729	101.431	77.5148	0.764212	-0.387955	0.120648	1
	AABR07042454.2	12.5614	18.0025	7.12029	0.395516	-1.33819	0.120726	1
	AABR07027272.1	130.577	97.1463	164.007	1.68825	0.755529	0.120743	1
	Spry4	2008.51	1770.57	2246.44	1.26876	0.343425	0.121139	1
	Nr3c1	1449.51	1274.29	1624.74	1.27501	0.350511	0.121348	1
	Zscan26	850.212	735.171	965.252	1.31296	0.392825	0.121458	1
	Creb1	100.877	79.0708	122.684	1.55157	0.633732	0.121512	1
	Sh3gl3	2147.99	2242.51	2053.47	0.915705	-0.127046	0.121947	1
	Zfp800	306.016	257.972	354.059	1.37247	0.456774	0.122694	1
	Disp1	286.434	268.004	304.863	1.13753	0.185907	0.122766	1
	Man2b1	1327.86	1286.43	1369.28	1.0644	0.0900436	0.1228	1
	Unc5c	2876.96	2417.12	3336.81	1.38049	0.465182	0.122956	1
	Plag1	29.663	16.1424	43.1835	2.67516	1.41962	0.123357	1
	Cd69	3.01698	1.5766	4.45735	2.82719	1.49937	0.12336	1
	Pyroxd2	197.323	178.71	215.936	1.20831	0.272985	0.12337	1
	Mthfs	169.315	161.675	176.954	1.09451	0.130282	0.123428	1
	Auts2l	83.4251	60.3795	106.471	1.76336	0.818324	0.123707	1
	4930452B06Rik	208.671	230.575	186.767	0.810006	-0.303996	0.123856	1
	Hopx	434.562	416.522	452.602	1.08662	0.119849	0.123976	1
	Nbeal1	198.376	160.435	236.317	1.47297	0.558731	0.123994	1
	Sox18	70.1957	24.1124	116.279	4.82238	2.26974	0.124009	1
	Pappa	43.4983	30.537	56.4596	1.84889	0.886659	0.124032	1
	Cntrl	310.482	278.588	342.375	1.22897	0.297444	0.124196	1
	Frem1	527.09	392.638	661.542	1.68486	0.752631	0.124687	1
	Rhbdf2	176.875	145.98	207.769	1.42326	0.509204	0.125184	1
	Creb3l2	839.783	555.311	1124.26	2.02455	1.0176	0.125309	1
	ST7	884.361	1011.35	757.375	0.748877	-0.4172	0.12536	1
	Etl4	819.283	590.086	1048.48	1.77683	0.829304	0.125693	1
	Nfkbiz	161.513	100.29	222.737	2.22094	1.15117	0.126043	1
	Ssh1	262.222	202.755	321.688	1.58658	0.665923	0.126204	1
	Ext1	1322.84	1230.69	1414.98	1.14975	0.201321	0.126295	1
	Wnt7a	1138.68	1270.23	1007.13	0.792872	-0.33484	0.126561	1
	Gda	903.595	693.186	1114	1.60708	0.68444	0.126571	1
	Smad7	298.46	261.985	334.934	1.27845	0.354391	0.126617	1
	AABR07030630.1	17.9701	11.2879	24.6524	2.18396	1.12695	0.126877	1
	Irs1	772.733	582.072	963.394	1.65511	0.726928	0.127068	1
	Adcy8	632.301	518.059	746.544	1.44104	0.527111	0.127376	1
	Ctrb1	26.6227	35.806	17.4394	0.487052	-1.03785	0.127803	1
	Cxcl16	341.022	308.115	373.928	1.2136	0.279293	0.127894	1
	Samd4a	498.817	410.648	586.986	1.42942	0.515425	0.128017	1
	Camk2d	2130.97	1992.44	2269.49	1.13905	0.187829	0.128113	1
	Ephb3	324.736	382.372	267.1	0.698535	-0.517597	0.12816	1
	Lin7a	50.3396	35.8575	64.8218	1.80776	0.854207	0.128167	1
	Mob3b	63.3488	48.3649	78.3327	1.61962	0.695656	0.128225	1
	Svil	1113.84	932.994	1294.69	1.38767	0.472665	0.12835	1
	Mss51	61.2257	53.2056	69.2458	1.30148	0.380149	0.128351	1
	F8	383.946	301.722	466.171	1.54503	0.62764	0.128795	1
	Krt76	4.97536	2.67392	7.2768	2.7214	1.44435	0.128803	1
	Stap2	35.4273	29.1198	41.7349	1.43321	0.519255	0.128826	1
	Palld	677.563	583.034	772.092	1.32427	0.405193	0.128963	1
	Akt2	2384.81	1981.85	2787.77	1.40665	0.492267	0.129022	1
	Arhgap6	90.0578	79.2375	100.878	1.27311	0.348358	0.129313	1
	Ube3d	86.1135	106.841	65.3859	0.611993	-0.708412	0.129542	1
	Lrp1b	59.7436	45.9023	73.5849	1.60308	0.680844	0.129601	1
	Hyal3	554.659	582.205	527.114	0.905376	-0.143411	0.129699	1
	Fyb	71.8116	55.2944	88.3288	1.59743	0.675751	0.130367	1
	Creb5	26.804	18.609	34.9991	1.88076	0.911318	0.130502	1
	Gpc6	273.65	234.609	312.69	1.33281	0.414474	0.130853	1
	AABR07045405.1	64.7864	49.2433	80.3296	1.63128	0.706002	0.13104	1
	RGD1304595	295.406	262.811	328.001	1.24805	0.319671	0.131163	1
	Daam2	233.624	203.541	263.707	1.2956	0.373616	0.13135	1
	Y_RNA	29.2212	20.4494	37.9929	1.85789	0.893667	0.131407	1
	Leng8	2500.37	2148.6	2852.13	1.32744	0.408643	0.131592	1
	Pla2g4a	48.7281	44.7664	52.6898	1.177	0.235109	0.131638	1
	Paqr8	1562.77	1201.47	1924.07	1.60142	0.679354	0.131664	1
	Rab27b	188.942	135.419	242.466	1.79049	0.840354	0.132171	1
	Rasef	46.2592	36.8413	55.677	1.51126	0.595755	0.132438	1
	Flt4	70.2511	62.8905	77.6118	1.23408	0.303434	0.132695	1
	LOC498675	97.503	114.077	80.9287	0.709419	-0.49529	0.132732	1
	Ccl4	42.788	18.2177	67.3582	3.69741	1.88651	0.132868	1
	Dusp6	1080.22	919.951	1240.49	1.34844	0.431287	0.132883	1
	Hipk2	1140.59	818.809	1462.37	1.78597	0.836707	0.132919	1
	Ccdc17	120.717	114.41	127.024	1.11025	0.150887	0.13322	1
	AABR07008016.1	184.674	199.428	169.92	0.852034	-0.231017	0.133422	1
	Nufip2	821.002	639.897	1002.11	1.56604	0.647123	0.133537	1
	Chac1	584.874	518.867	650.88	1.25442	0.327026	0.133574	1
	Vsx2	35.5783	41.9093	29.2474	0.697873	-0.518964	0.133637	1
	Nhlrc3	425.344	365.472	485.216	1.32764	0.408866	0.133919	1
	Arsg	1840.7	1555.06	2126.34	1.36737	0.451403	0.133992	1
	Fam222a	47.8007	35.6822	59.9193	1.67925	0.747817	0.134167	1
	Pi4k2b	241.314	199.005	283.623	1.42521	0.511173	0.134499	1
	Qser1	1610.81	1482.7	1738.92	1.17281	0.229967	0.134619	1
	Rreb1	473.6	397.664	549.535	1.38191	0.466661	0.134834	1
	Sfrp2	75.7078	57.0129	94.4026	1.65581	0.727537	0.135073	1
	Phlda3	999.701	915.569	1083.83	1.18378	0.243401	0.135119	1
	P3h2	37.6661	31.7175	43.6146	1.3751	0.459532	0.135379	1
	Thbs3	407.216	374.415	440.017	1.17521	0.232921	0.135416	1
	Dsel	331.801	286.349	377.254	1.31746	0.397763	0.135515	1
	Tnfaip2	701.571	355.244	1047.9	2.94979	1.56061	0.135574	1
	Fzd3	1403.21	1124.89	1681.53	1.49484	0.579995	0.135826	1
	Adamts17	113.504	86.412	140.595	1.62703	0.702245	0.135927	1
	Tmem140	72.6443	68.7164	76.5721	1.11432	0.156165	0.135932	1
	Zfp536	290.755	236.76	344.749	1.45612	0.542124	0.136171	1
	Kcnh5	35.7545	27.4518	44.0572	1.60489	0.682478	0.136228	1
	Fndc9	171.283	185.008	157.557	0.85162	-0.231718	0.136394	1
	Otud4	865.851	678.164	1053.54	1.55351	0.635536	0.136454	1
	Gpr153	546.308	583.77	508.846	0.871655	-0.198172	0.136611	1
	Setx	2656.36	2232.01	3080.7	1.38024	0.464915	0.136629	1
	Cdh5	66.9191	102.567	31.2713	0.304887	-1.71365	0.136736	1
	Zfp191	792.342	702.186	882.498	1.25679	0.329738	0.136859	1
	Pxmp4	781.359	871.212	691.506	0.793729	-0.333282	0.136873	1
	RGD1561157	24.7268	21.3791	28.0746	1.31318	0.393067	0.137236	1
	Arrdc2	352.808	360.194	345.423	0.958992	-0.0604086	0.137339	1
	Cpeb1	541.491	462.339	620.643	1.3424	0.424814	0.137383	1
	Bnip2	544.708	500.581	588.835	1.1763	0.234261	0.137537	1
	Tmtc1	65.613	50.0578	81.1681	1.62149	0.697317	0.137558	1
	Rcan3	116.978	93.1558	140.8	1.51145	0.595933	0.13759	1
	Ankrd28	2354.61	1925.47	2783.75	1.44575	0.53182	0.137693	1
	Loxl4	172.319	94.7593	249.879	2.63698	1.39889	0.137957	1
	Chodl	715.522	892.853	538.191	0.602776	-0.730305	0.138092	1
	Rab20	121.807	114.241	129.373	1.13246	0.179457	0.138455	1
	Tuba1a	75708.1	83576.9	67839.4	0.8117	-0.300982	0.138648	1
	U6	287.065	244.616	329.513	1.34706	0.429819	0.138692	1
	Kat6a	3076.1	2615.76	3536.44	1.35197	0.435066	0.138752	1
	Pik3r5	36.4712	24.86	48.0823	1.93413	0.951682	0.139124	1
	Lamc2	145.473	127.169	163.776	1.28786	0.364976	0.139346	1
	Rtn2	3340.64	3613.95	3067.34	0.84875	-0.236589	0.139371	1
	Slc25a37	80.1801	67.3298	93.0303	1.38171	0.466456	0.139752	1
	Bmp15	18.0916	13.9605	22.2228	1.59183	0.670686	0.139959	1
	Egfl8	66.0996	51.4468	80.7524	1.56963	0.650425	0.140044	1
	Ammecr1	30.8936	23.8536	37.9337	1.59027	0.669275	0.140179	1
	Muc13	11.6435	8.63789	14.649	1.6959	0.762056	0.140234	1
	Hspa1l	70.5469	82.5833	58.5104	0.708501	-0.497157	0.14038	1
	Rabif	316.291	348.195	284.386	0.816743	-0.292045	0.140492	1
	Fndc3c1	35.0258	30.2708	39.7807	1.31416	0.394141	0.140621	1
	Lman1	900.322	824.708	975.936	1.18337	0.242902	0.141175	1
	LOC100910173	349.711	397.382	302.039	0.760073	-0.395789	0.141267	1
	Osr1	141.654	180.765	102.543	0.567269	-0.817895	0.141554	1
	SNORA48	15.0538	11.5017	18.6059	1.61766	0.693904	0.141691	1
	Prune2	514.621	422.08	607.162	1.4385	0.524566	0.141708	1
	Bhlhe40	763.993	690.888	837.097	1.21162	0.276943	0.141915	1
	Klf5	105.961	90.6089	121.312	1.33886	0.421001	0.142425	1
	Lsr	99.082	87.226	110.938	1.27185	0.346925	0.14244	1
	Fam178a	1330.06	1107.36	1552.76	1.40222	0.487711	0.142515	1
	AABR07055288.1	7.69835	5.87551	9.52119	1.62049	0.696427	0.142779	1
	RT1-CE7	485.09	392.37	577.81	1.47262	0.558382	0.142824	1
	Cckar	10.3653	6.66482	14.0657	2.11044	1.07755	0.142873	1
	Igf2bp2	40.2898	34.028	46.5515	1.36804	0.452109	0.143312	1
	Fam46a	115.973	100.958	130.989	1.29746	0.37569	0.143468	1
	Nxpe4	45.5343	37.9939	53.0747	1.39693	0.482258	0.143531	1
	Pygo1	383.575	326.791	440.358	1.34752	0.43031	0.144015	1
	Rragd	1026.69	903.076	1150.31	1.27377	0.349103	0.144021	1
	Abcc4	768.221	689.798	846.645	1.22738	0.295583	0.144033	1
	Helz2	121.326	94.1269	148.525	1.57792	0.658027	0.144101	1
	Extl3	1798.49	1561.34	2035.64	1.30378	0.382703	0.144223	1
	Brwd1	1084.74	885.34	1284.15	1.45046	0.536508	0.144379	1
	Sgpl1	2472.54	2318.56	2626.52	1.13282	0.179925	0.144616	1
	As3mt	68.145	64.8742	71.4157	1.10083	0.138596	0.14476	1
	Cryga	100.535	116.44	84.6308	0.726819	-0.460332	0.144773	1
	Chchd10	54.5684	51.1743	57.9624	1.13265	0.179699	0.145177	1
	AABR07067355.1	79.2571	64.988	93.5263	1.43913	0.525198	0.146165	1
	Pde5a	274.035	223.334	324.736	1.45404	0.540063	0.146401	1
	Trpv4	50.4653	49.8292	51.1014	1.02553	0.0363724	0.146525	1
	Plcl1	555.413	467.903	642.922	1.37405	0.458433	0.146542	1
	Slco1a2	72.2477	65.9768	78.5186	1.19009	0.251074	0.146827	1
	Hlx	33.314	27.8908	38.7372	1.38889	0.473932	0.147264	1
	Ube3a	2195.53	1798.03	2593.04	1.44216	0.52823	0.147318	1
	Mmab	494.989	509.685	480.293	0.942333	-0.0856913	0.147796	1
	Bdp1	956.315	763.014	1149.62	1.50668	0.591371	0.147803	1
	Selv	22.8624	31.9596	13.7653	0.430709	-1.21522	0.147971	1
	AABR07061825.1	122.238	140.967	103.509	0.734276	-0.445606	0.148226	1
	Fdft1	7386.74	7635.51	7137.98	0.93484	-0.0972084	0.148356	1
	Mrpl1	29.3868	35.2316	23.542	0.668206	-0.581634	0.148426	1
	Tlr2	115.672	85.0671	146.277	1.71955	0.782027	0.148476	1
	Zfp192	684.944	554.94	814.948	1.46853	0.554378	0.148531	1
	2016-03-09	780.051	874.177	685.925	0.784652	-0.349875	0.148573	1
	Fam181b	445.165	432.466	457.863	1.05873	0.0823295	0.148576	1
	Stxbp2	153.908	146.781	161.035	1.09711	0.133713	0.148606	1
	Gap43	31289	34662.4	27915.5	0.805356	-0.312302	0.148663	1
	Abat	3931.29	3504.21	4358.37	1.24375	0.314697	0.148849	1
	Bend4	85.3994	58.7069	112.092	1.90935	0.933081	0.148921	1
	Gipc2	42.6823	38.2279	47.1368	1.23305	0.302228	0.148987	1
	Slc1a2	1507.39	1169.63	1845.15	1.57756	0.657693	0.14903	1
	Rdh5	103.618	77.5245	129.711	1.67316	0.742572	0.149522	1
	AABR07071659.2	30.0021	21.7684	38.2357	1.75648	0.812684	0.149707	1
	Lyrm5	109.419	105.788	113.051	1.06865	0.0957938	0.149728	1
	Rnf213	1034.31	827.656	1240.96	1.49937	0.584353	0.150187	1
	Slitrk2	292.325	237.413	347.236	1.46258	0.548519	0.150412	1
	Zfp641	94.7822	75.1922	114.372	1.52106	0.605079	0.150518	1
	AABR07034362.1	72.9938	89.7083	56.2792	0.627357	-0.67264	0.150634	1
	Ccl3	34.2243	11.553	56.8956	4.92473	2.30004	0.150703	1
	Epb4.1l5	320.085	264.8	375.37	1.41756	0.503411	0.150866	1
	Atp10a	96.7541	79.1445	114.364	1.445	0.531069	0.150882	1
	Spsb4	495.815	528.718	462.912	0.875536	-0.191762	0.150911	1
	Ntrk3	1698.31	1335.88	2060.75	1.54262	0.625384	0.151068	1
	Syn3	176.38	119.748	233.012	1.94584	0.960396	0.151737	1
	AABR07041724.1	12.3559	7.3847	17.327	2.34634	1.23041	0.152069	1
	Armc6	1073.67	1205.14	942.203	0.781819	-0.355093	0.152136	1
	Csad	504.716	493.341	516.091	1.04611	0.0650395	0.152235	1
	Gas7	4593.37	3797.6	5389.13	1.41909	0.504963	0.152336	1
	Bspry	355.255	371.491	339.02	0.912594	-0.131955	0.152404	1
	Cdt1	163.189	157.224	169.153	1.07587	0.10551	0.152614	1
	Myh8	13.4963	18.959	8.03362	0.423737	-1.23876	0.152906	1
	Sarnp	1625.81	1876.13	1375.48	0.73315	-0.447819	0.152962	1
	Lrp4	1580.1	1422.57	1737.64	1.22148	0.288628	0.153025	1
	Calb2	1513.42	1678.13	1348.71	0.8037	-0.315272	0.153042	1
	Tet3	1265.6	960.643	1570.55	1.6349	0.709202	0.153119	1
	Mycl	721.759	790.483	653.035	0.826121	-0.275574	0.153226	1
	Nek10	111.1	83.6929	138.507	1.65495	0.726786	0.153319	1
	Ttpa	27.5085	22.7079	32.3091	1.42281	0.508742	0.153707	1
	LOC689081	4.4303	2.25429	6.6063	2.93054	1.55116	0.153739	1
	Abca8a	1641.4	1380.79	1902.01	1.37748	0.462026	0.153963	1
	Nfil3	553.213	521.885	584.542	1.12006	0.163574	0.154454	1
	Lbr	303.027	261.695	344.36	1.31588	0.39603	0.154476	1
	Nt5c1a	59.9417	48.0135	71.8698	1.49687	0.581946	0.154569	1
	Uevld	53.6642	40.3656	66.9629	1.65891	0.730234	0.154708	1
	Abca1	5140.32	4265.33	6015.31	1.41028	0.495982	0.155331	1
	SNORD19B	5.34891	2.69188	8.00594	2.97411	1.57246	0.155381	1
	Gcnt1	31.2619	26.1167	36.4072	1.39402	0.479248	0.155395	1
	Mrps27	1016.78	1112.45	921.113	0.828001	-0.272295	0.155549	1
	Maf	360.925	331.079	390.771	1.1803	0.23915	0.15569	1
	Lrp6	972.711	809.529	1135.89	1.40315	0.488671	0.156196	1
	Slc6a1	12485.9	10733.8	14238	1.32646	0.407581	0.156265	1
	Limd1	641.948	575.687	708.209	1.2302	0.298891	0.1564	1
	Zcchc2	604.308	518.181	690.436	1.33242	0.414052	0.156453	1
	Rab38	158.947	140.264	177.629	1.26639	0.340721	0.156473	1
	Asxl2	431.467	351.289	511.645	1.45648	0.542483	0.156651	1
	Drd1	39.5239	29.538	49.5099	1.67614	0.745147	0.156719	1
	Eda2r	75.6194	59.6063	91.6326	1.5373	0.620397	0.156913	1
	Sqle	12009.8	12088.6	11931	0.98696	-0.0189363	0.156967	1
	Chd1l	121.267	104.007	138.527	1.3319	0.413486	0.157633	1
	Phactr2	215.185	189.426	240.944	1.27197	0.347066	0.157719	1
	Adamtsl4	224.304	205.385	243.222	1.18423	0.243945	0.157824	1
	Rest	269.663	224.868	314.459	1.39842	0.483793	0.158286	1
	Bcor	1036.37	872.236	1200.51	1.37636	0.460855	0.158376	1
	Slc20a2	1792.74	1727.76	1857.73	1.07523	0.104638	0.159018	1
	Mb21d1	14.9453	11.8923	17.9983	1.51344	0.597827	0.159062	1
	Tmtc2	246.415	214.031	278.799	1.30261	0.381404	0.159459	1
	Dhrs11	323.402	313.08	333.725	1.06594	0.0921315	0.159537	1
	Gja4	13.5808	18.9029	8.25879	0.436906	-1.19461	0.159541	1
	Syne1	3242.99	2801.7	3684.29	1.31502	0.395086	0.159908	1
	Foxk1	1121.59	919.169	1324	1.44043	0.526504	0.159966	1
	AABR07033829.1	296.126	335.777	256.476	0.763827	-0.388681	0.159982	1
	Eva1c	47.4507	41.3908	53.5105	1.29281	0.370511	0.160067	1
	RGD1564405	73.3135	57.3117	89.3153	1.55841	0.640078	0.160069	1
	Tnxb	172.135	149.017	195.252	1.31026	0.389858	0.16056	1
	Fam89b	2857.73	3190.48	2524.97	0.791407	-0.337508	0.160638	1
	Rrad	21.2511	17.908	24.5942	1.37336	0.457714	0.160766	1
	Sc5d	5002.17	4968	5036.33	1.01375	0.0197077	0.161052	1
	Ccdc27	24.4554	18.1592	30.7516	1.69344	0.75996	0.161074	1
	LOC100911597	143.457	123.258	163.656	1.32775	0.408981	0.161166	1
	Orm1	6.28769	1.10747	11.4679	10.355	3.37226	0.161278	1
	Hnrnpa1	3563.04	4100.73	3025.35	0.737759	-0.438778	0.161285	1
	Antxr1	686.466	615.652	757.281	1.23005	0.298713	0.161341	1
	Dnah9	1422.08	1180.48	1663.68	1.40933	0.495009	0.161516	1
	Acox2	31.8096	29.5227	34.0966	1.15493	0.207802	0.161557	1
	Tnfsf18	28.0231	22.7643	33.2818	1.46202	0.547961	0.161725	1
	Gigyf1	780.182	636.263	924.102	1.45239	0.53843	0.16218	1
	Abcg5	38.9617	34.4609	43.4626	1.26122	0.334815	0.162237	1
	Pdgfc	492.937	436.516	549.359	1.25851	0.331714	0.162372	1
	Tchh	114.045	85.6122	142.478	1.66422	0.734849	0.16243	1
	Slc20a1	5968.44	4314.69	7622.19	1.76657	0.820951	0.162442	1
	Nova1	739.751	600.936	878.566	1.462	0.547941	0.162593	1
	Asap1	1887.61	1598.14	2177.08	1.36226	0.446002	0.16279	1
	Osgin1	201.58	243.184	159.975	0.657836	-0.604201	0.162831	1
	Barx1	17.3869	20.2106	14.5632	0.720574	-0.472782	0.162949	1
	Hmgcll1	279.894	259.629	300.159	1.15611	0.209277	0.163063	1
	Pde6g	7.45708	10.6662	4.24797	0.398265	-1.3282	0.163069	1
	Mfsd1	2372.7	2262.23	2483.18	1.09767	0.134441	0.163174	1
	Cntnap3	158.255	117.999	198.51	1.6823	0.750439	0.163371	1
	Pcgf5	219.736	200.86	238.612	1.18795	0.248474	0.163421	1
	Lrrc17	164.379	243.904	84.854	0.347899	-1.52326	0.163717	1
	Lepr	189.826	169.909	209.742	1.23444	0.303852	0.164141	1
	Trim21	419.953	360.048	479.858	1.33276	0.414419	0.164395	1
	Tmem245	377.324	293.173	461.475	1.57407	0.654497	0.164414	1
	Scly	755.057	792.268	717.845	0.906064	-0.142315	0.164489	1
	Acot7	9224.56	9908.3	8540.82	0.861987	-0.214262	0.164745	1
	Zfp503	124.969	108.971	140.966	1.29361	0.371403	0.164982	1
	Phactr3	2539.96	2600.37	2479.55	0.953538	-0.0686382	0.164989	1
	Endod1	409.669	342.339	477	1.39336	0.478565	0.164995	1
	Rn60_8_0651.1	13.9116	7.86159	19.9615	2.53912	1.34433	0.165162	1
	AABR07016841.1	344.903	373.918	315.887	0.844803	-0.243313	0.165385	1
	Irak3	88.6217	81.6516	95.5919	1.17073	0.227408	0.165604	1
	Ubtd1	490.073	563.809	416.337	0.738436	-0.437455	0.165651	1
	Jmjd7	42.2761	33.5401	51.0121	1.52093	0.60495	0.165697	1
	Acly	15328.1	15159.8	15496.4	1.0222	0.0316815	0.165823	1
	Exog	564.591	624.286	504.895	0.808756	-0.306224	0.166429	1
	Ap1m2	9.91758	7.09594	12.7392	1.79528	0.844209	0.166451	1
	Fam208a	922.076	753.446	1090.71	1.44762	0.533686	0.166652	1
	Nudt7	104.965	103.331	106.599	1.03162	0.044908	0.166792	1
	Macf1	14742.9	12605.2	16880.5	1.33917	0.421339	0.167008	1
	Tnfaip6	115.716	97.8837	133.548	1.36436	0.448221	0.16708	1
	Mvd	3381.09	3433.15	3329.03	0.969674	-0.0444286	0.167135	1
	Pdgfra	550.978	832.393	269.564	0.323842	-1.62664	0.167175	1
	Setd7	521.114	418.799	623.429	1.48861	0.573966	0.167251	1
	Ttf1	314.383	280.303	348.462	1.24316	0.314013	0.16726	1
	Kcnh7	116.091	82.4476	149.733	1.81611	0.860848	0.167318	1
	Cidea	17.0765	14.4003	19.7527	1.37169	0.455952	0.16737	1
	Rnf43	42.1064	38.1987	46.0141	1.2046	0.268551	0.167423	1
	Wdr92	207.915	245.232	170.598	0.695659	-0.523548	0.167632	1
	Eif4ebp2	965.871	886.987	1044.76	1.17787	0.236181	0.16771	1
	Chrm5	39.3132	42.6669	35.9595	0.842796	-0.246745	0.167896	1
	Wrap53	318.781	378.414	259.147	0.684826	-0.546191	0.167922	1
	Lpin3	132.258	122.88	141.636	1.15263	0.204931	0.167963	1
	Fmn2	762.468	635.159	889.777	1.40087	0.486327	0.16818	1
	Gls2	269.18	290.686	247.674	0.852031	-0.231022	0.168241	1
	Dennd4c	701.869	605.833	797.906	1.31704	0.397299	0.168325	1
	Rab11fip2	401.302	307.728	494.876	1.60816	0.685411	0.168511	1
	Ydjc	778.316	855.354	701.277	0.819868	-0.286536	0.16872	1
	Kcnt1	327.303	313.66	340.945	1.08699	0.120339	0.168736	1
	Rn60_15_0408.6	54.1437	47.371	60.9163	1.28594	0.362824	0.168973	1
	Nlrp3	21.333	12.2642	30.4017	2.4789	1.3097	0.169137	1
	Npat	828.075	725.938	930.213	1.2814	0.357715	0.169163	1
	Erlin2	2149.5	2014.64	2284.36	1.13388	0.181268	0.169322	1
	Grap2	56.4673	64.3583	48.5764	0.75478	-0.405871	0.169763	1
	Ano3	97.3811	86.8388	107.923	1.2428	0.313597	0.170143	1
	Sox13	220.663	205.222	236.104	1.15048	0.20224	0.17018	1
	Ankrd61	29.6918	19.7301	39.6535	2.0098	1.00705	0.170282	1
	Sh2d3c	662.192	720.433	603.951	0.838316	-0.254434	0.170329	1
	Stmn4	10269	10977.4	9560.62	0.870939	-0.199357	0.170406	1
	Pgs1	1943.85	2100.72	1786.97	0.850648	-0.233367	0.170582	1
	Acap2	1536.6	1297.71	1775.49	1.36818	0.452254	0.170758	1
	Slc16a9	70.8781	59.6188	82.1373	1.37771	0.46227	0.170829	1
	Bdkrb2	43.9974	29.4278	58.567	1.99019	0.992909	0.171172	1
	Terf2ip	3241.91	3619.16	2864.66	0.791527	-0.33729	0.171324	1
	Tc2n	92.2389	81.4297	103.048	1.26549	0.339692	0.171362	1
	Tlr12	7.90282	6.70182	9.10381	1.35841	0.441917	0.171489	1
	AABR07062513.1	670.488	519.085	821.891	1.58335	0.662977	0.171516	1
	Liph	17.5278	12.6633	22.3924	1.76828	0.822349	0.172287	1
	Ern1	419.867	372.452	467.282	1.25461	0.327241	0.172785	1
	LOC100362658	289.231	321.406	257.056	0.799785	-0.322317	0.172831	1
	Gareml	214.215	266.806	161.624	0.605773	-0.723152	0.172996	1
	LOC102550196	5.75866	2.94736	8.56996	2.90768	1.53987	0.173268	1
	Tnfrsf12a	855.046	790.68	919.413	1.16281	0.217618	0.17337	1
	Lcor	321.581	236.203	406.959	1.72292	0.784854	0.173422	1
	Rasal2	762.137	613.954	910.32	1.48272	0.568243	0.17344	1
	AABR07019888.1	267.037	484.628	49.4467	0.10203	-3.29293	0.173573	1
	F8a1	1257.52	1382.98	1132.06	0.818566	-0.288829	0.173991	1
	Syt14	258.458	194.739	322.178	1.65441	0.726319	0.174133	1
	Cdc14b	100.435	87.2961	113.573	1.30101	0.379637	0.174343	1
	Xkr6	104.323	78.4963	130.15	1.65804	0.729479	0.174344	1
	Pgr15l	14.1093	9.46328	18.7554	1.98191	0.986892	0.174358	1
	Islr	637.109	931.687	342.531	0.367646	-1.44361	0.174754	1
	Mir212	12.9648	10.0915	15.838	1.56944	0.650247	0.174761	1
	Slc25a40	74.8884	63.2585	86.5183	1.36769	0.451746	0.174953	1
	Adamts20	38.0354	26.7084	49.3624	1.8482	0.886122	0.175156	1
	Rel	43.8653	34.3372	53.3935	1.55498	0.636892	0.175254	1
	Popdc3	185.179	192.9	177.457	0.919942	-0.120385	0.175328	1
	Cyp7b1	1962.06	1798.36	2125.77	1.18206	0.241305	0.175381	1
	Usf1	2924	3177.74	2670.25	0.840299	-0.251025	0.175384	1
	Lypd1	489.272	415.19	563.354	1.35686	0.440271	0.175435	1
	AABR07024593.2	124.963	114.719	135.208	1.1786	0.237074	0.175639	1
	Agpat9	835.213	706.169	964.256	1.36548	0.449403	0.175777	1
	Tnfrsf1b	88.2193	76.6902	99.7485	1.30067	0.379254	0.175796	1
	F2rl2	24.483	19.1328	29.8332	1.55927	0.640873	0.175934	1
	AABR07049799.1	5.00144	2.32789	7.67499	3.29697	1.72114	0.175956	1
	Enpp3	75.9944	106.558	45.4308	0.426349	-1.22989	0.176204	1
	Kctd2	1094.65	1210.17	979.131	0.809087	-0.305634	0.176335	1
	Cdc42ep4	1556.57	1537.54	1575.61	1.02476	0.0352844	0.17644	1
	Glb1l	778.743	738.413	819.073	1.10923	0.149563	0.176667	1
	Slc30a1	931.521	780.712	1082.33	1.38634	0.471278	0.176744	1
	Wwtr1	534.164	445.096	623.232	1.40022	0.485652	0.176847	1
	Apod	1227.46	1715.76	739.165	0.430809	-1.21488	0.176872	1
	3082ex4-5	27.5759	19.8373	35.3145	1.78021	0.832049	0.176876	1
	Hrh1	154.644	137.298	171.99	1.25267	0.325008	0.176941	1
	Lag3	10.9047	14.9891	6.82031	0.455017	-1.13601	0.177132	1
	Mga	1664.73	1339.38	1990.09	1.48582	0.571264	0.177171	1
	Ebf2	18.0394	26.6617	9.41723	0.353212	-1.50139	0.177192	1
	Qk	181.214	153.704	208.724	1.35796	0.441437	0.177435	1
	AABR07035796.1	106.276	83.0809	129.472	1.55839	0.640053	0.177476	1
	Serpine1	881.976	627.852	1136.1	1.8095	0.855594	0.177624	1
	Baz1a	295.456	262.087	328.825	1.25464	0.327272	0.177693	1
	Slc35d2	54.6141	50.4244	58.8038	1.16618	0.221789	0.177861	1
	Parp14	781.773	635.198	928.347	1.46151	0.547458	0.177864	1
	Bmp3	320.657	195.434	445.881	2.28149	1.18997	0.177878	1
	Sgk1	1668.48	1610.11	1726.86	1.07251	0.100996	0.177898	1
	Enah	2318.34	2016.49	2620.18	1.29938	0.377825	0.178137	1
	Actr3b	1769.01	1874.44	1663.59	0.887514	-0.172159	0.178467	1
	Pnp	3334.35	3207.67	3461.04	1.07899	0.109679	0.178694	1
	Lhx5	10.9642	15.1726	6.75588	0.445268	-1.16725	0.178851	1
	Slc9a3r2	724.764	795.431	654.097	0.822317	-0.282234	0.178852	1
	Ggct	325.892	362.305	289.48	0.798996	-0.323739	0.179074	1
	Tnks	2654.79	2051.02	3258.56	1.58875	0.667891	0.179695	1
	Intu	182.707	160.732	204.682	1.27344	0.348726	0.179711	1
	Manba	174.759	164.802	184.716	1.12084	0.16458	0.179739	1
	C3	2832.78	2491.23	3174.32	1.2742	0.349594	0.179878	1
	Aox4	27.3314	41.6486	13.0142	0.312476	-1.67818	0.180197	1
	Fam161a	102.376	116.88	87.8723	0.751814	-0.411553	0.180375	1
	Zc3h12a	131.72	73.3878	190.052	2.5897	1.37279	0.180403	1
	Mfap2	310.099	386.393	233.805	0.605097	-0.724761	0.180429	1
	Pon1	24.6042	19.0586	30.1498	1.58195	0.661703	0.180474	1
	Tekt3	19.9622	30.0612	9.86331	0.328108	-1.60776	0.180552	1
	Gng12	265.53	236.619	294.441	1.24437	0.315412	0.180655	1
	Gpr176	321.151	242.427	399.874	1.64946	0.721995	0.180766	1
	Pdlim5	1448.62	1195.5	1701.74	1.42345	0.509397	0.18104	1
	Tead1	498.502	394.405	602.598	1.52787	0.611517	0.181137	1
	Fam110d	76.5344	102.936	50.1328	0.487029	-1.03792	0.181245	1
	Glis3	421.15	356.581	485.719	1.36216	0.445891	0.18139	1
	Sycp3	62.5529	50.5367	74.5691	1.47554	0.561246	0.181475	1
	Sh3bp5	1618.79	1691.41	1546.18	0.914136	-0.129519	0.181623	1
	Csrp2	815.226	890.842	739.61	0.830237	-0.268405	0.181658	1
	Crym	11096.2	12036.5	10156	0.843763	-0.24509	0.181734	1
	Celsr1	2955.7	2580.31	3331.09	1.29096	0.36845	0.181951	1
	Naglu	667.909	653.854	681.963	1.04299	0.0607253	0.182023	1
	Magi1	1065.01	920.133	1209.88	1.3149	0.394954	0.182065	1
	Cecr2	238.799	190.629	286.968	1.50537	0.590122	0.182082	1
	Cyp4v3	309.98	269.284	350.675	1.30225	0.381008	0.182105	1
	Rn60_1_1141.1	33.2622	42.6448	23.8795	0.559962	-0.836598	0.182133	1
	Erbb4	467.123	322.95	611.296	1.89285	0.920563	0.182232	1
	Atm	614.132	546.847	681.416	1.24608	0.317398	0.182234	1
	AC128618.1	189.813	189.869	189.756	0.999401	-0.00086475	0.18231	1
	Lrrk2	329.868	288.075	371.661	1.29015	0.367542	0.182312	1
	Osbpl5	1964.68	2103.85	1825.52	0.867706	-0.204721	0.182429	1
	Prdm5	90.5123	84.1796	96.8451	1.15046	0.202208	0.18245	1
	LOC500227	389.859	430.879	348.839	0.809598	-0.304723	0.182587	1
	Mtcl1	333.936	286.053	381.82	1.33479	0.416614	0.182619	1
	Pcdh17	2198.06	1689.63	2706.49	1.60183	0.679717	0.182739	1
	Crmp1	34138.6	36122.2	32154.9	0.890171	-0.167846	0.182798	1
	Ptgfrn	2501.81	2419.85	2583.76	1.06774	0.0945563	0.182803	1
	Spty2d1	411.947	333.226	490.668	1.47248	0.558245	0.182873	1
	G2e3	392.863	335.459	450.266	1.34224	0.42464	0.183041	1
	Tdrd9	6.52589	3.99898	9.0528	2.26378	1.17873	0.183108	1
	AABR07031674.2	86.2756	69.9895	102.562	1.46539	0.551284	0.183163	1
	Thg1l	437.676	498.55	376.802	0.755795	-0.403932	0.183286	1
	Ehhadh	17.492	21.5362	13.4477	0.624425	-0.679401	0.183372	1
	Ccdc62	213.557	182.835	244.278	1.33605	0.417979	0.183376	1
	Phospho1	278.716	299.226	258.206	0.862912	-0.212716	0.183556	1
	Mmel1	34.0339	41.5563	26.5115	0.637965	-0.648452	0.183598	1
	Hmgcs1	33046.5	32481.6	33611.4	1.03479	0.0493314	0.183664	1
	Ptchd2	1191.71	993.527	1389.89	1.39894	0.484335	0.183691	1
	Asah1	2651.19	2530.66	2771.71	1.09525	0.131263	0.183743	1
	Lsm5	193.322	234.024	152.62	0.652157	-0.61671	0.183743	1
	Sema6d	2891.32	2560.62	3222.02	1.25829	0.33147	0.183932	1
	Ccdc15	45.4953	35.7406	55.25	1.54586	0.628411	0.183996	1
	Astn2	631.927	576.056	687.799	1.19398	0.25578	0.184026	1
	Aga	730.73	727.173	734.287	1.00978	0.0140449	0.184265	1
	Sfn	29.9959	27.9536	32.0381	1.14612	0.196755	0.184313	1
	Zic2	584.762	547.182	622.343	1.13736	0.18569	0.184373	1
	B4galt1	189.494	158.967	220.021	1.38407	0.468915	0.184397	1
	Ppp1r14c	3384.25	3514.93	3253.58	0.925646	-0.111468	0.184532	1
	Zmiz1	8289.79	7209.53	9370.05	1.29968	0.378152	0.184654	1
	1700021K19Rik	1995.23	1678.36	2312.1	1.37759	0.462151	0.184663	1
	Ldb2	355.904	208.759	503.048	2.40971	1.26886	0.184755	1
	Pik3c2a	1045.03	927.571	1162.49	1.25326	0.325691	0.184809	1
	AABR07030911.1	230.898	269.183	192.613	0.715547	-0.482882	0.184822	1
	LOC691141	69.1721	73.1979	65.1463	0.890002	-0.168119	0.184839	1
	Otud7b	631.958	576.184	687.731	1.19359	0.255314	0.18491	1
	Zbtb10	157.244	126.453	188.034	1.48699	0.572392	0.184947	1
	Zbtb26	181.371	148.582	214.161	1.44136	0.527435	0.185223	1
	Prkcd	373.112	351.683	394.541	1.12186	0.165899	0.185231	1
	Msrb3	260.021	237.67	282.372	1.18808	0.248634	0.185345	1
	Slc5a5	63.6519	60.941	66.3627	1.08896	0.122958	0.185628	1
	LOC688708	505.169	406.319	604.019	1.48656	0.571982	0.185888	1
	Sult5a1	25.8789	21.8198	29.938	1.37206	0.456341	0.186076	1
	AABR07053669.1	54.3668	48.5331	60.2004	1.2404	0.310804	0.186232	1
	Naip6	11.6024	6.78988	16.415	2.41757	1.27356	0.186265	1
	Zbtb25	231.426	188.728	274.124	1.45248	0.538516	0.186342	1
	Adgrg6	579.368	489.374	669.362	1.36779	0.45185	0.186416	1
	Alkbh8	323.937	269.38	378.494	1.40506	0.49063	0.186604	1
	Bcl3	72.0074	61.495	82.5198	1.34189	0.424271	0.186802	1
	Zfp462	1970.34	1619.81	2320.88	1.43281	0.518845	0.186953	1
	Vav3	544.671	482.749	606.594	1.25654	0.329458	0.187262	1
	Cnih2	18274.1	19638.5	16909.7	0.861051	-0.21583	0.187467	1
	Ccnjl	306.518	329.294	283.743	0.861671	-0.214791	0.187516	1
	Tnrc6b	4222.99	3575.1	4870.88	1.36245	0.446199	0.187535	1
	Glce	1772.93	1544.75	2001.12	1.29543	0.373434	0.187595	1
	Gucy1a2	129.676	94.2144	165.137	1.75278	0.809647	0.188098	1
	Elf1	223.241	202.614	243.868	1.20361	0.267363	0.188125	1
	Nckap1l	44.0477	34.6274	53.468	1.54409	0.626761	0.1884	1
	Chst11	1042.08	838.961	1245.19	1.48421	0.569692	0.188448	1
	Ccnd1	3646.83	2628.47	4665.2	1.77487	0.827714	0.188771	1
	Ankrd35	73.4054	81.9644	64.8465	0.791154	-0.33797	0.189239	1
	Gxylt1	814.841	734.393	895.288	1.21908	0.285798	0.189294	1
	Hspbp1	2970.73	3333.25	2608.21	0.782481	-0.353872	0.189312	1
	Ctbs	227.212	212.833	241.591	1.13512	0.18285	0.189432	1
	Foxe1	56.6125	60.3406	52.8844	0.876431	-0.190287	0.189433	1
	Myh14	1422.53	1352.23	1492.83	1.10398	0.142711	0.189437	1
	Cntn2	1748.6	1730.85	1766.35	1.02051	0.0292868	0.189632	1
	Spry1	748.832	714.973	782.692	1.09471	0.130555	0.189801	1
	Kitlg	1973.97	1847.69	2100.26	1.1367	0.184845	0.189854	1
	AC126148.2	297.806	335.88	259.732	0.773288	-0.370921	0.189914	1
	Nav2	5857.56	4524.16	7190.96	1.58946	0.668533	0.190459	1
	Afmid	118.636	94.8106	142.462	1.50259	0.587454	0.190502	1
	Gli2	139.696	127.863	151.528	1.18508	0.244986	0.190543	1
	Chd1	815.374	723.978	906.769	1.25248	0.32479	0.19077	1
	AABR07035273.1	131.03	103.725	158.334	1.52648	0.610206	0.190771	1
	Idi1	5161.85	5190.28	5133.43	0.989045	-0.0158915	0.19085	1
	AABR07036732.1	162.601	130.016	195.185	1.50123	0.586146	0.190914	1
	Satb1	618.804	502.453	735.154	1.46313	0.549057	0.191005	1
	Baz2b	662.566	557.408	767.723	1.37731	0.461851	0.191169	1
	Slc15a1	59.1657	66.1167	52.2147	0.789735	-0.34056	0.191228	1
	Hpse	159.464	98.1688	220.76	2.24878	1.16914	0.191305	1
	Ptprv	103.682	97.985	109.38	1.11629	0.158712	0.191426	1
	RGD1311756	247.366	239.961	254.771	1.06172	0.0864043	0.191602	1
	Tmem200c	363.278	422.279	304.276	0.720557	-0.472816	0.191903	1
	Fnbp1	1478.21	1328.99	1627.43	1.22456	0.292257	0.192205	1
	Pvalb	61.4889	54.2371	68.7407	1.26741	0.341886	0.192286	1
	AABR07030590.1	238.953	204.346	273.561	1.33871	0.420848	0.192327	1
	RT1-A3	173.903	149.893	197.914	1.32037	0.400937	0.192375	1
	Prex1	3831.41	3392.2	4270.61	1.25895	0.332223	0.192663	1
	Ubc	4797.28	5348.44	4246.12	0.793898	-0.332975	0.192707	1
	Ptx4	4.06823	2.51561	5.62086	2.23439	1.15988	0.192847	1
	Dmpk	984.072	938.856	1029.29	1.09632	0.13267	0.192899	1
	Nfxl1	466.765	389.658	543.873	1.39577	0.481062	0.19297	1
	Mroh2a	24.1447	19.427	28.8625	1.48569	0.571136	0.193012	1
	Serpine2	8608.27	7879.16	9337.39	1.18508	0.244978	0.193085	1
	Sdsl	117.573	115.955	119.19	1.0279	0.0396967	0.193279	1
	AABR07062512.1	257.915	234.967	280.863	1.19533	0.257412	0.193352	1
	Plcb2	12.4352	8.65824	16.2122	1.87246	0.904934	0.193355	1
	Mansc4	11.8774	9.44213	14.3126	1.51582	0.600101	0.193812	1
	Setd1b	1024.39	827.821	1220.97	1.47492	0.560633	0.193896	1
	Tmem196	49.5896	32.4227	66.7566	2.05895	1.04191	0.193913	1
	Sox9	1239.67	1145.4	1333.93	1.1646	0.219831	0.19393	1
	Fat4	2775.55	2104.72	3446.37	1.63744	0.711445	0.194265	1
	Ldhd	93.3963	89.6773	97.1154	1.08294	0.114957	0.194638	1
	Chn1	7369.44	7748.29	6990.59	0.902211	-0.148463	0.19464	1
	Slc4a4	2468.55	2043.28	2893.82	1.41626	0.50209	0.194787	1
	Dennd1b	133.008	110.199	155.818	1.41396	0.499746	0.194941	1
	Heatr5a	695.62	647.27	743.97	1.1494	0.200876	0.194977	1
	Tep1	507.547	477.709	537.385	1.12492	0.169824	0.195001	1
	Bag2	562.383	617.975	506.792	0.820085	-0.286155	0.19536	1
	AABR07066820.1	29.8905	17.6757	42.1054	2.38211	1.25224	0.195378	1
	Efcab14	1936.86	1832.05	2041.67	1.11442	0.156293	0.195562	1
	Pura	394.317	328.131	460.504	1.40341	0.488941	0.195566	1
	Ap5m1	339.458	295.264	383.652	1.29935	0.377795	0.195586	1
	Jmjd6	628.106	693.373	562.838	0.811739	-0.300911	0.195589	1
	Cyp2c11	34.0116	47.8687	20.1544	0.421034	-1.24799	0.195643	1
	Gxylt2	74.5683	54.921	94.2157	1.71548	0.778611	0.195904	1
	Rassf8	736.184	683.583	788.785	1.1539	0.206515	0.195928	1
	AABR07027854.1	1307.79	1481.75	1133.83	0.765195	-0.386101	0.196018	1
	Zfp655	91.4702	71.6593	111.281	1.55292	0.634983	0.19611	1
	Apol3	52.2186	75.5541	28.8831	0.382284	-1.38728	0.196152	1
	Cpt1a	1688.27	1623.39	1753.14	1.07992	0.11093	0.196165	1
	Mon1a	469.449	528.599	410.3	0.776202	-0.365496	0.19629	1
	Hmbox1	256.512	202.118	310.906	1.53824	0.621282	0.196332	1
	Tnfrsf9	51.3866	39.4405	63.3328	1.60578	0.683275	0.196366	1
	Kazald1	26.0358	32.5911	19.4805	0.597723	-0.742451	0.196607	1
	Traf4	1481.74	1681.85	1281.63	0.762032	-0.392077	0.196661	1
	Stx11	50.9775	37.1345	64.8205	1.74556	0.803689	0.196995	1
	Sorbs1	2542.04	2187.21	2896.86	1.32445	0.405397	0.197183	1
	Banf1	2530.57	2925.83	2135.31	0.729812	-0.454404	0.197198	1
	Rfx7	1589.63	1297.77	1881.5	1.44979	0.535842	0.197313	1
	Khnyn	148.235	126.046	170.424	1.35208	0.43518	0.197348	1
	Ech1	1799.3	1843.04	1755.55	0.95253	-0.0701634	0.19747	1
	Gns	103.141	93.4224	112.86	1.20806	0.272694	0.197682	1
	Sstr1	469.165	403.321	535.009	1.32651	0.407635	0.19774	1
	Gas6	10564.9	10368.3	10761.6	1.03793	0.0537127	0.197752	1
	Zfp608	1677.91	1442.45	1913.37	1.32647	0.407592	0.197791	1
	Pag1	68.1626	59.0734	77.2517	1.30773	0.387059	0.197845	1
	Epdr1	1442	1384.05	1499.94	1.08373	0.116004	0.197869	1
	AABR07015006.1	1655.71	1829.83	1481.59	0.809684	-0.304569	0.198168	1
	Ssx1	6.84	3.92448	9.75552	2.48582	1.31372	0.198197	1
	Crabp1	396.215	462.637	329.794	0.712857	-0.488316	0.198501	1
	Tf	8405.89	7070.7	9741.09	1.37767	0.462231	0.198546	1
	RGD1565566	506.046	600.633	411.46	0.685043	-0.545733	0.198721	1
	AABR07002910.1	1043.73	1141.4	946.059	0.828859	-0.270802	0.19883	1
	Rasa2	652.383	526.5	778.266	1.47819	0.56383	0.198943	1
	Cdh4	1436.26	1172.24	1700.28	1.45046	0.536508	0.19912	1
	Slc4a10	2648	1956.19	3339.8	1.7073	0.771714	0.199211	1
	Kcnj16	310.09	258.359	361.822	1.40046	0.4859	0.199236	1
	Samd5	238.881	192.215	285.547	1.48556	0.571007	0.199307	1
	Hvcn1	42.9586	37.0868	48.8305	1.31665	0.396877	0.199425	1
	Rprml	1291.39	1341.59	1241.19	0.925167	-0.112214	0.199449	1
	Tmem56	537.361	447.552	627.169	1.40133	0.486799	0.199532	1
	Sh3yl1	283.553	330.097	237.01	0.718002	-0.477941	0.199547	1
	Nudt6	227.18	201.284	253.076	1.2573	0.330335	0.199625	1
	Slc12a7	957.106	811.914	1102.3	1.35765	0.441116	0.199924	1
	Lrrc36	15.8336	14.6971	16.9702	1.15466	0.207473	0.199951	1
	Ace	522.299	471.381	573.217	1.21604	0.282186	0.199994	1
	Sapcd2	162.9	191.463	134.338	0.701638	-0.511201	0.200032	1
	Ago4	90.9938	73.7057	108.282	1.46911	0.554944	0.200093	1
	Mef2c	2081.91	1510.35	2653.47	1.75685	0.812995	0.200281	1
	Pmvk	1458.9	1553.85	1363.95	0.877788	-0.188056	0.200305	1
	Rps6ka1	622.145	689.581	554.708	0.804413	-0.313992	0.200492	1
	Ppm1f	2192.86	2001.73	2383.99	1.19096	0.252129	0.20072	1
	Cdk17	2764.48	2361	3167.96	1.34179	0.424157	0.200736	1
	Ar	29	18.1222	39.8777	2.20048	1.13782	0.200963	1
	Trib1	314.746	245.494	383.998	1.56419	0.645412	0.201092	1
	Baz2a	1077.1	863.312	1290.9	1.49528	0.58042	0.201202	1
	AABR07051326.1	22.0456	15.6331	28.4581	1.82038	0.864238	0.201448	1
	Cbr3	134.301	168.703	99.8984	0.592154	-0.755956	0.20151	1
	Megf9	2722.87	2257.09	3188.65	1.41273	0.498483	0.201778	1
	Bag3	1329.02	1139.98	1518.05	1.33165	0.413211	0.201844	1
	P2rx4	334.246	332.291	336.2	1.01177	0.0168761	0.20187	1
	Fam213b	596.918	671.288	522.548	0.778426	-0.361368	0.20195	1
	Car2	1909.52	1838.98	1980.06	1.07672	0.106643	0.202062	1
	Ankrd1	12.0948	18.0106	6.17893	0.343072	-1.54342	0.202128	1
	Il2rg	6.74775	3.83162	9.66389	2.52215	1.33465	0.202134	1
	Hmgn5b	90.1275	106.362	73.8934	0.694738	-0.525459	0.202439	1
	Myc	663.992	710.456	617.529	0.869201	-0.202238	0.202662	1
	Tfcp2l1	216.106	180.356	251.856	1.39644	0.481758	0.202711	1
	Dgki	656.657	549.895	763.419	1.3883	0.473318	0.202818	1
	Purg	204.451	167.87	241.032	1.43583	0.521885	0.203063	1
	Ldlrad3	51.6429	40.9298	62.3559	1.52348	0.607375	0.203101	1
	Rnf13	646.702	608.457	684.947	1.12571	0.170836	0.203143	1
	Krt2	224.643	244.789	204.497	0.835401	-0.259459	0.203199	1
	Tnfrsf11b	27.9574	18.3753	37.5396	2.04294	1.03065	0.203243	1
	Ggact	187.027	185.263	188.791	1.01904	0.0272102	0.203427	1
	Nodal	9.56532	7.45089	11.6797	1.56756	0.648524	0.203444	1
	Lin37	349.618	398.981	300.255	0.752555	-0.410131	0.203591	1
	Smurf2	1303.97	1201.4	1406.55	1.17075	0.227439	0.203611	1
	Fgf2	233.163	163.52	302.806	1.8518	0.888926	0.203778	1
	C1qtnf1	147.937	153.081	142.793	0.932788	-0.100378	0.203911	1
	Nelfb	2617.3	2936.45	2298.14	0.782626	-0.353605	0.203945	1
	Myo6	2088.38	2000.87	2175.88	1.08747	0.120975	0.20401	1
	Nrtn	42.5922	57.8111	27.3734	0.473497	-1.07857	0.204268	1
	Mllt11	18463.7	19687.4	17239.9	0.875682	-0.191521	0.204392	1
	Me2	1816.93	1719.36	1914.51	1.1135	0.155104	0.20442	1
	Mid2	956.947	857.468	1056.43	1.23203	0.301038	0.204448	1
	Hn1	6546.14	7405.15	5687.13	0.767997	-0.380828	0.204669	1
	Ephb6	1112.07	966.468	1257.67	1.30131	0.379962	0.204715	1
	Nr2c2ap	1005.7	981.154	1030.24	1.05003	0.070429	0.204866	1
	Car8	72.8287	69.773	75.8845	1.08759	0.121137	0.204896	1
	Cxcl11	169.557	149.703	189.411	1.26525	0.33942	0.204923	1
	Slc6a7	941.38	943.176	939.583	0.996191	-0.00550607	0.204982	1
	Ier5l	373.676	360.899	386.454	1.07081	0.0987004	0.204985	1
	Serhl2	49.5879	45.3496	53.8261	1.18691	0.247214	0.205118	1
	Uap1l1	902.556	864.231	940.88	1.08869	0.122593	0.205335	1
	Tbc1d1	1529.22	1369.94	1688.49	1.23253	0.30162	0.20557	1
	Stmn1	14398.6	16613.2	12184	0.73339	-0.447347	0.205741	1
	Kdsr	457.264	424.194	490.334	1.15592	0.209039	0.205751	1
	Myo9b	1804.94	1654.34	1955.54	1.18206	0.241306	0.205817	1
	Skap2	172.376	146.299	198.453	1.35649	0.43988	0.205927	1
	LOC497940	131.386	158.365	104.408	0.659288	-0.601019	0.205969	1
	Dip2b	2456.98	2068.68	2845.28	1.37541	0.459861	0.206134	1
	Fbxl15	662.471	714.975	609.968	0.853132	-0.229159	0.206294	1
	AY172581.10	88.5423	154.554	22.5302	0.145775	-2.77819	0.206667	1
	Gins3	131.797	157.069	106.524	0.678199	-0.56022	0.206799	1
	Pcmtd2	1428.65	1179.17	1678.13	1.42314	0.509081	0.207134	1
	Shisa8	104.912	138.525	71.2983	0.514697	-0.958206	0.207337	1
	Nudt22	191.741	229.401	154.081	0.671667	-0.574182	0.20751	1
	Rhbdf1	1046.95	1015.97	1077.92	1.06098	0.085393	0.207536	1
	Gpsm1	3549.61	3847.45	3251.76	0.845173	-0.242681	0.207558	1
	Zfyve26	836.077	735.206	936.949	1.2744	0.349821	0.207569	1
	Arhgap12	1802.37	1719.29	1885.45	1.09664	0.133092	0.207617	1
	Alox15	18.6866	23.3785	13.9947	0.598614	-0.740301	0.207683	1
	Sh3pxd2a	300.939	253.877	348.001	1.37075	0.454964	0.207779	1
	Atf7	256.551	216.219	296.883	1.37307	0.457401	0.207943	1
	H2afz	642.176	747.343	537.009	0.718557	-0.476826	0.208225	1
	Arhgef3	777.374	690.876	863.873	1.2504	0.322393	0.208659	1
	Ppm1j	19.0603	24.7573	13.3633	0.539771	-0.889579	0.208822	1
	Ptgr2	1114.18	1086.63	1141.73	1.0507	0.0713565	0.208973	1
	Ccdc81	47.0173	56.3586	37.676	0.668505	-0.58099	0.208985	1
	Hmgcs2	515.646	528.297	502.996	0.952107	-0.070804	0.209121	1
	Ptpn7	222.572	215.165	229.978	1.06885	0.0960579	0.209382	1
	Vax2	32.176	25.1052	39.2467	1.56329	0.644587	0.20946	1
	Nktr	2036.61	1541.52	2531.7	1.64234	0.715752	0.209585	1
	Ccdc23	456.463	536.229	376.697	0.702492	-0.509446	0.2097	1
	Ccnt1	61.9715	44.4974	79.4456	1.7854	0.836245	0.20979	1
	Myof	650.908	605.901	695.915	1.14856	0.199827	0.209801	1
	Tbxas1	31.7484	27.5663	35.9306	1.30342	0.382307	0.2099	1
	Zbtb38	402.458	330.913	474.003	1.43241	0.518444	0.210058	1
	Adipor1	5004.1	4804.78	5203.42	1.08297	0.11499	0.210361	1
	AABR07026473.1	56.543	39.9584	73.1277	1.8301	0.87192	0.210558	1
	Zfp612	370.882	294.745	447.019	1.51663	0.600869	0.211034	1
	Trim46	2000.93	2075.22	1926.64	0.928402	-0.107178	0.211041	1
	Kcna1	1125.44	892.784	1358.09	1.52118	0.605195	0.211126	1
	Fgr	49.2017	39.5022	58.9011	1.49108	0.57636	0.211137	1
	Kcnk15	336.573	374.741	298.405	0.796296	-0.328623	0.211314	1
	Adgrv1	1124.55	1018.28	1230.81	1.20872	0.273477	0.21133	1
	Sik1	531.291	481.115	581.467	1.20858	0.273316	0.211488	1
	Smoc2	41.3806	59.4943	23.2669	0.391078	-1.35447	0.211542	1
	Sdc4	2921.81	2706.99	3136.63	1.15872	0.212527	0.21194	1
	Clic3	88.7857	97.6241	79.9473	0.81893	-0.288189	0.211982	1
	Rab11fip1	374.507	337.508	411.505	1.21925	0.28599	0.212063	1
	Il17re	67.9157	76.241	59.5904	0.781605	-0.355487	0.212073	1
	AABR07052388.1	41.4693	35.9978	46.9409	1.30399	0.382935	0.212221	1
	Srebf1	9174.03	8010.47	10337.6	1.29051	0.36794	0.212307	1
	Trpm7	1114.39	980.338	1248.44	1.27348	0.348781	0.212542	1
	Osbpl6	2333.86	1992.92	2674.79	1.34215	0.424544	0.212687	1
	Maff	258.869	204.058	313.681	1.53722	0.620321	0.212838	1
	LOC100360726	108.09	86.7943	129.386	1.49073	0.576014	0.212853	1
	Taok1	2193.77	1730.41	2657.14	1.53555	0.618758	0.212948	1
	LOC100911595	40.0814	25.452	54.7108	2.14957	1.10405	0.212991	1
	Carf	214.97	168.45	261.49	1.55233	0.634432	0.213141	1
	Chpt1	770.849	710.126	831.572	1.17102	0.227767	0.213156	1
	Mafa	19.1043	20.3929	17.8158	0.87363	-0.194905	0.213177	1
	Pcsk6	561.696	530.268	593.124	1.11854	0.161612	0.213379	1
	Rbpms2	154.306	150.921	157.69	1.04485	0.0632944	0.213445	1
	Tbcel	405.915	358.502	453.328	1.26451	0.338575	0.21362	1
	Tmx3	891.571	782.006	1001.14	1.28022	0.356386	0.213645	1
	Kif26b	442.681	361.464	523.897	1.44938	0.535432	0.213826	1
	Chrna5	175.489	173.725	177.253	1.02031	0.0290033	0.213922	1
	Grin2b	1397.17	963.505	1830.83	1.90017	0.926133	0.214089	1
	Slc12a4	1468.6	1415.66	1521.54	1.07479	0.104058	0.214095	1
	Psmb3	2294.73	2651.54	1937.93	0.730868	-0.452318	0.214173	1
	Igdcc4	2321.32	2068.16	2574.49	1.24482	0.315936	0.214347	1
	Cntn3	189.197	151.523	226.871	1.49727	0.582336	0.21443	1
	Kcnj3	725.53	548.672	902.389	1.64468	0.717805	0.214573	1
	Mettl4	47.1417	44.415	49.8685	1.12278	0.167079	0.214931	1
	Pard6a	351.034	388.675	313.393	0.806312	-0.31059	0.214942	1
	Asxl3	243.829	186.791	300.867	1.61071	0.6877	0.214947	1
	Nrros	24.7242	21.0122	28.4362	1.35332	0.436503	0.214974	1
	Higd1b	9.27261	6.31842	12.2268	1.9351	0.952411	0.215285	1
	Actn1	3408.63	3097.71	3719.55	1.20074	0.263926	0.21531	1
	Rpl37a	3125.72	3701.36	2550.07	0.688955	-0.537519	0.215561	1
	Arl5c	8.27935	5.71021	10.8485	1.89984	0.925879	0.215625	1
	SCARNA18	3.53998	1.71689	5.36307	3.12371	1.64326	0.215735	1
	Tbc1d9	2715.86	2268.87	3162.85	1.39402	0.479252	0.21575	1
	LOC100912195	1250.41	1407.11	1093.71	0.777273	-0.363507	0.215811	1
	Pfpl	11.0785	8.11013	14.0468	1.732	0.792443	0.215904	1
	Ears2	120.826	100.384	141.267	1.40727	0.492896	0.215965	1
	Wrn	173.509	162.429	184.589	1.13643	0.184507	0.216058	1
	SNORD25	9.54317	5.7196	13.3667	2.33701	1.22466	0.216264	1
	Ntrk2	20259.2	19104.6	21413.8	1.12087	0.164618	0.216306	1
	Dlg1	1484.86	1347.07	1622.65	1.20458	0.268532	0.216481	1
	Cdh20	356.868	330.439	383.297	1.15996	0.214079	0.216484	1
	Klhl29	985.272	805.358	1165.19	1.44679	0.532858	0.21657	1
	2016-03-04	1471.7	1506.45	1436.95	0.953865	-0.0681434	0.216607	1
	Sh3bp1	180.232	166.199	194.264	1.16886	0.225107	0.217004	1
	Slc25a38	647.997	743.843	552.151	0.742294	-0.429937	0.217037	1
	Dgkz	5562.56	5687.87	5437.27	0.955941	-0.0650061	0.217074	1
	Ttc38	140.964	135.428	146.5	1.08175	0.113372	0.217109	1
	AABR07008420.2	23.3488	15.1437	31.5538	2.08363	1.0591	0.217314	1
	Ripk4	34.0026	28.1076	39.8976	1.41946	0.505344	0.217457	1
	Mansc1	176.48	172.536	180.425	1.04572	0.0644996	0.217471	1
	Tmem116	28.4642	24.6574	32.271	1.30878	0.388217	0.217497	1
	Coch	371.79	388.007	355.573	0.916408	-0.125939	0.217627	1
	Sdk1	340.075	276.654	403.495	1.45848	0.544465	0.217698	1
	Tpp1	2554.43	2474.27	2634.58	1.06479	0.090568	0.218089	1
	Pgp	1794.73	1958.64	1630.82	0.832628	-0.264255	0.21814	1
	Sat1	1755.45	1636.07	1874.83	1.14594	0.196526	0.21821	1
	Olfm3	122.911	84.2961	161.526	1.91617	0.938227	0.218258	1
	Dynll1	9823.39	10748.1	8898.62	0.827921	-0.272435	0.218406	1
	Pitpnm3	387.577	333.096	442.058	1.32712	0.408297	0.218496	1
	Tubd1	110.446	130.978	89.9146	0.686486	-0.542697	0.21851	1
	Stmn2	53441.2	56001.2	50881.2	0.908573	-0.138325	0.21872	1
	Sun2	1355.13	1270.06	1440.19	1.13395	0.181361	0.218794	1
	Ankrd63	6.96064	4.73028	9.19099	1.94301	0.958294	0.218852	1
	Kdm5d	507.441	388.392	626.491	1.61304	0.689782	0.218964	1
	Itgbl1	1582.47	1584	1580.93	0.998061	-0.00280084	0.218968	1
	Penk	1300.7	1328.8	1272.6	0.957703	-0.0623494	0.219006	1
	Ptprd	3323.54	2756.4	3890.68	1.41151	0.49724	0.219046	1
	Sesn3	1863.55	1604.78	2122.33	1.32251	0.403275	0.219165	1
	AABR07026483.1	49.3016	32.736	65.8672	2.01207	1.00868	0.219211	1
	Wapal	1153.13	1020.63	1285.63	1.25963	0.333004	0.219301	1
	Slc35f1	2459.85	2098.94	2820.76	1.3439	0.426421	0.219322	1
	Dnajb14	366.721	299.171	434.271	1.45158	0.537623	0.219586	1
	Prkd1	391.168	383.996	398.34	1.03735	0.0529088	0.219595	1
	Ccdc175	231.366	272.238	190.493	0.699731	-0.515127	0.219621	1
	Traf6	193.077	158.883	227.271	1.43043	0.516444	0.219682	1
	Armc10	1460.54	1609.07	1312.01	0.815384	-0.294449	0.219851	1
	Saa4	335.093	302.192	367.994	1.21775	0.284215	0.219881	1
	Tmem144	180.786	168.835	192.736	1.14156	0.191004	0.220002	1
	Zfp428	1304.89	1468.7	1141.08	0.776932	-0.36414	0.220023	1
	Rapgef5	1145.72	966.255	1325.18	1.37146	0.455717	0.220043	1
	Tmem246	2104.86	2215.22	1994.5	0.900361	-0.151425	0.220165	1
	Sec23b	1429.86	1404.01	1455.7	1.03682	0.052161	0.220169	1
	Chl1	9787.67	7544.58	12030.8	1.59462	0.673215	0.220347	1
	RT1-M6-2	18.6135	14.4121	22.8149	1.58303	0.662692	0.220353	1
	Ino80d	239.669	175.846	303.493	1.7259	0.78735	0.220447	1
	Wnt9a	20.6117	25.4778	15.7456	0.618011	-0.694295	0.220454	1
	Bbs12	102.007	87.0086	117.006	1.34477	0.427355	0.22053	1
	Ccdc141	90.5313	81.4984	99.5642	1.22167	0.288855	0.220626	1
	Tmsb10	6968.36	8334.46	5602.26	0.67218	-0.57308	0.220651	1
	Bmp2k	638.548	586.766	690.33	1.1765	0.234502	0.220803	1
	Aacs	4311.94	4325.11	4298.76	0.993906	-0.00881796	0.220835	1
	Dpp7	4484.11	4576.57	4391.65	0.959593	-0.0595046	0.22085	1
	Arvcf	2116.84	2386.8	1846.88	0.773788	-0.369989	0.22096	1
	Zfp518a	328.191	282.966	373.417	1.31965	0.400159	0.221256	1
	Cobl	197.802	166.572	229.032	1.37497	0.459402	0.221275	1
	Ptpn14	129.798	106.762	152.834	1.43154	0.517567	0.221379	1
	Gfra2	553.552	599.11	507.994	0.847915	-0.238009	0.221398	1
	Grm2	194.71	153.689	235.731	1.53382	0.617126	0.22142	1
	Slc25a1	2749.78	3027.38	2472.19	0.816611	-0.292279	0.221562	1
	Rwdd2b	531.667	580.166	483.169	0.832812	-0.263937	0.221677	1
	Acvrl1	34.5862	47.7345	21.4379	0.449108	-1.15487	0.221864	1
	Mfap3l	1996.16	1577.35	2414.98	1.53104	0.614508	0.222045	1
	Cdh10	1008.11	1072.69	943.533	0.879596	-0.185086	0.222295	1
	Sds	49.1918	55.3496	43.034	0.777494	-0.363096	0.222321	1
	C1qtnf4	1920.06	2069.19	1770.93	0.855857	-0.224559	0.222326	1
	Foxo6	2223.11	2257.82	2188.39	0.969248	-0.0450619	0.222353	1
	Dhrs3	351.736	464.872	238.6	0.513259	-0.962241	0.222353	1
	RGD1562037	355.168	298.562	411.774	1.37919	0.463822	0.222435	1
	AABR07050283.2	10.4793	7.3305	13.6281	1.85909	0.894596	0.222438	1
	Bmpr1a	1402.73	1246.36	1559.1	1.25092	0.322991	0.222484	1
	Itgav	2220.56	1768.66	2672.45	1.51101	0.59551	0.222736	1
	Fsd1	1212.33	1339.71	1084.95	0.809838	-0.304295	0.222756	1
	Cks1b	365.333	435.218	295.449	0.678854	-0.558827	0.222789	1
	Cramp1l	481.656	392.098	571.214	1.45681	0.542816	0.222806	1
	Ehd2	212.807	280.403	145.211	0.517866	-0.949349	0.222832	1
	Ttc14	563.923	489.389	638.457	1.3046	0.383608	0.222837	1
	LOC690422	537.688	591.354	484.022	0.818498	-0.288949	0.222858	1
	AABR07024641.1	29.0928	38.9192	19.2664	0.495037	-1.01439	0.222927	1
	Anxa7	1311.44	1304.04	1318.84	1.01135	0.0162808	0.223282	1
	Fbln7	40.6889	38.0375	43.3403	1.13941	0.188287	0.223416	1
	Ago3	118.98	94.5477	143.412	1.51682	0.601053	0.223422	1
	St3gal6	231.595	177.216	285.974	1.6137	0.690375	0.223696	1
	Gldn	92.5344	68.6904	116.378	1.69425	0.760643	0.223718	1
	Dtx4	1346.33	1156.58	1536.08	1.32812	0.409384	0.223844	1
	Znhit1	943.345	1051.07	835.623	0.795023	-0.330932	0.224421	1
	Rab27a	271.835	233.182	310.488	1.33153	0.413086	0.22444	1
	Ascc2	584.964	513.101	656.828	1.28012	0.356274	0.224637	1
	Cep112	109.239	99.6314	118.847	1.19287	0.254431	0.224665	1
	Mib1	2441.72	1950.36	2933.08	1.50387	0.588676	0.224687	1
	Hspb1	1288.29	1299.61	1276.96	0.982571	-0.0253664	0.224913	1
	Inhbb	991.16	1005.48	976.841	0.971518	-0.0416878	0.224955	1
	Ccdc28b	648.336	723.453	573.219	0.792338	-0.335813	0.225017	1
	Ctnnd1	3187.45	3052.5	3322.41	1.08842	0.122241	0.22527	1
	Rpl17	848.769	1155.43	542.106	0.46918	-1.09179	0.225274	1
	Lrr1	8.09782	12.3693	3.82639	0.309347	-1.6927	0.225347	1
	Gsta3	17.823	15.6362	20.0099	1.27972	0.355829	0.225467	1
	Atp7a	304.751	262.34	347.162	1.32333	0.404168	0.225502	1
	AABR07041963.1	46.3678	32.0088	60.7269	1.89719	0.923868	0.22555	1
	Adat1	140.153	162.154	118.152	0.728641	-0.45672	0.225664	1
	Rnaseh2b	285.618	338.966	232.269	0.685228	-0.545343	0.22568	1
	Syna	9.39396	5.55734	13.2306	2.38074	1.25141	0.2259	1
	Abcg3l3	102.167	96.1672	108.167	1.12478	0.169648	0.2262	1
	Trpm6	26.2456	27.0324	25.4588	0.941788	-0.0865258	0.226242	1
	Gfm2	810.422	690.191	930.653	1.3484	0.431247	0.22648	1
	Slc22a12	260.747	284.324	237.17	0.834155	-0.261613	0.226493	1
	Kcna2	581.515	438.678	724.352	1.65122	0.723528	0.226534	1
	Lamp5	98.8896	87.4881	110.291	1.26064	0.334158	0.226583	1
	Hspb8	1529.3	1404.57	1654.03	1.1776	0.235849	0.226623	1
	Bfsp2	21.0015	18.5321	23.471	1.2665	0.340849	0.226925	1
	Tmem176a	266.98	260.014	273.945	1.05358	0.0752959	0.226935	1
	RGD1560108	3496.72	3693.2	3300.24	0.893597	-0.162304	0.226984	1
	Taf6l	566.321	635.78	496.863	0.781501	-0.355681	0.227052	1
	Cntnap5b	55.9712	35.8787	76.0637	2.12003	1.08408	0.227081	1
	Nhsl1	2089.71	1709.56	2469.86	1.44474	0.530806	0.227193	1
	Epas1	5051.5	4479.19	5623.82	1.25554	0.328313	0.227576	1
	Stat5a	75.8728	72.8441	78.9015	1.08316	0.115239	0.227623	1
	Ngfrap1	5475.13	5916.82	5033.43	0.850697	-0.233282	0.227639	1
	Zbtb8a	204.907	230.243	179.571	0.779921	-0.3586	0.227737	1
	Rac3	4038.25	4387.1	3689.4	0.840965	-0.249882	0.227876	1
	Dtna	1342.79	1152.29	1533.29	1.33065	0.412126	0.227883	1
	Sap30l	501.188	566.307	436.068	0.77002	-0.377031	0.227888	1
	Vrk2	60.5236	61.2741	59.7732	0.975504	-0.0357798	0.227991	1
	Greb1	34.6022	30.4893	38.715	1.26979	0.344591	0.228095	1
	Rsf1	1071.13	878.141	1264.12	1.43954	0.525607	0.228158	1
	Btbd19	469.545	446.421	492.67	1.1036	0.142218	0.228259	1
	Clic4	932.502	828.974	1036.03	1.24978	0.321668	0.22862	1
	Sae1	3551.98	3979.45	3124.51	0.785161	-0.34894	0.228683	1
	Msn	4608.65	4353.52	4863.77	1.1172	0.159893	0.229178	1
	Mtfp1	407.547	431.295	383.799	0.889874	-0.168327	0.229335	1
	Ctsk	406.866	562.367	251.366	0.446979	-1.16172	0.229375	1
	Adcyap1	482.203	419.134	545.273	1.30095	0.379568	0.229422	1
	Sema3b	269.537	247.66	291.415	1.17668	0.234717	0.229435	1
	Wipi1	1235.7	978.184	1493.21	1.52652	0.610242	0.229456	1
	Chic1	76.3905	53.634	99.1469	1.84858	0.886419	0.229528	1
	Nmt2	1379.34	1148.74	1609.93	1.40147	0.48694	0.229623	1
	Tspan17	2869.47	2935.08	2803.85	0.955291	-0.0659885	0.230358	1
	Fam204a	338.104	294.123	382.085	1.29906	0.377472	0.230452	1
	SNORA15	25.3574	18.6003	32.1146	1.72656	0.787903	0.230547	1
	LOC687609	1595.79	1657.24	1534.33	0.92583	-0.111181	0.23056	1
	Fam69b	2628.01	2864.49	2391.53	0.834889	-0.260344	0.230603	1
	Zfp169	174.181	137.95	210.412	1.52528	0.609072	0.230828	1
	RGD1307155	235.935	274.406	197.463	0.7196	-0.474733	0.231008	1
	Dhdh	72.4541	58.0015	86.9066	1.49835	0.583375	0.231147	1
	Trps1	780.554	640.986	920.121	1.43548	0.521531	0.231209	1
	Tmem217	9.8298	12.087	7.57257	0.626503	-0.674606	0.231344	1
	Dpy19l1	2222.22	2195.68	2248.76	1.02417	0.034455	0.231478	1
	Tmem150b	556.725	591.61	521.841	0.882069	-0.181036	0.231503	1
	Adcy1	2546.2	1770.51	3321.89	1.87623	0.907838	0.231629	1
	Gck	40.3899	45.1162	35.6635	0.790481	-0.339197	0.231636	1
	Fam57b	2491.34	2631.76	2350.93	0.893293	-0.162794	0.231699	1
	Chst7	450.962	429.569	472.355	1.0996	0.136981	0.231909	1
	Chd9	1395.52	1115.07	1675.97	1.50302	0.587862	0.231981	1
	Uty	72.1247	54.7768	89.4726	1.6334	0.707881	0.232013	1
	Palm	10570.2	11204.8	9935.68	0.886732	-0.17343	0.232225	1
	Ust	181.88	155.803	207.956	1.33473	0.416552	0.232372	1
	Fam120a	3123.27	2820.19	3426.35	1.21494	0.280881	0.23241	1
	Ctsa	4230.37	4223.51	4237.23	1.00325	0.00467952	0.232473	1
	Nipsnap3b	904.691	1009.66	799.723	0.792073	-0.336295	0.232503	1
	Abtb2	176.183	172.385	179.98	1.04406	0.0622089	0.232558	1
	Il1rapl1	103.444	75.5726	131.316	1.73761	0.797108	0.232649	1
	Map3k2	254.075	198.929	309.221	1.55443	0.636383	0.233116	1
	Mx1	1777.29	1944.15	1610.42	0.828343	-0.2717	0.233212	1
	Elf4	75.8305	63.3122	88.3489	1.39545	0.48073	0.23331	1
	Large	8667.75	8977.02	8358.48	0.931097	-0.102997	0.233359	1
	Mdc1	453.164	408.011	498.318	1.22134	0.288461	0.233396	1
	Kdm7a	157.624	123.706	191.541	1.54836	0.630743	0.233585	1
	Sp1	1100.19	1032.87	1167.52	1.13036	0.176778	0.233645	1
	Lrfn5	1906.72	1954.91	1858.52	0.950696	-0.0729443	0.233674	1
	Atg16l2	150.809	143.923	157.695	1.09569	0.131842	0.233717	1
	Tp53inp1	280.623	238.611	322.635	1.35214	0.435241	0.233737	1
	Jade2	264.733	233.431	296.035	1.26819	0.342774	0.233871	1
	Dmrta2	208.341	209.718	206.964	0.986869	-0.01907	0.233945	1
	Cdhr5	10.1348	7.17095	13.0986	1.82662	0.869173	0.234097	1
	Nacc2	1597.19	1472.16	1722.22	1.16986	0.226331	0.234233	1
	Atr	380.903	355.857	405.949	1.14076	0.190001	0.234273	1
	Nrip3	11138.9	11293	10984.8	0.972717	-0.0399086	0.23444	1
	Slc17a8	131.311	130.908	131.714	1.00615	0.00885242	0.234496	1
	AABR07025303.1	83.633	96.5749	70.6911	0.731982	-0.45012	0.234512	1
	Zkscan5	1092.9	1211.39	974.423	0.804386	-0.31404	0.234523	1
	Plce1	898.12	837.293	958.947	1.14529	0.195717	0.234569	1
	Acsl5	2255.39	2484.45	2026.34	0.815611	-0.294047	0.234573	1
	Ociad2	211.873	187.19	236.556	1.26372	0.337679	0.234663	1
	Ripk1	668.55	627.129	709.971	1.1321	0.178998	0.234695	1
	Dalrd3	3092.84	3401.45	2784.23	0.818542	-0.288872	0.234698	1
	Tmem164	1219.69	1055.56	1383.82	1.31098	0.390645	0.235145	1
	Rfx3	1047.43	800.934	1293.92	1.61552	0.691997	0.235285	1
	Pcyt2	2174.35	2225.88	2122.82	0.9537	-0.0683932	0.23546	1
	Dnah8	24.6296	28.3791	20.8802	0.735759	-0.442695	0.235546	1
	Ptprz1	26233	23873.1	28593	1.19771	0.260272	0.235585	1
	Klf8	58.7233	41.4774	75.9692	1.83158	0.873088	0.235686	1
	Emcn	12.4726	15.7597	9.18554	0.582849	-0.778805	0.236059	1
	Ephx1	2966.52	2986.77	2946.27	0.986441	-0.0196961	0.236201	1
	Mtx3	173.025	130.022	216.028	1.66147	0.732461	0.236351	1
	Gpr139	228.742	227.757	229.727	1.00865	0.0124218	0.236365	1
	AABR07001780.1	16.2307	20.064	12.3974	0.617895	-0.694568	0.236461	1
	Tubb2b	49687.2	53833.4	45541.1	0.845964	-0.241332	0.236959	1
	Eea1	1011.01	791.533	1230.48	1.55456	0.636506	0.236967	1
	Cenpk	68.9439	82.7214	55.1664	0.666893	-0.584472	0.237017	1
	Gpr75	131.819	117.567	146.071	1.24244	0.31318	0.237157	1
	Gpr157	18.4367	14.0176	22.8558	1.63051	0.705322	0.237165	1
	Mypop	533.62	544.58	522.66	0.959749	-0.0592712	0.237228	1
	Dnajb9	1010.85	943.508	1078.19	1.14275	0.192506	0.237241	1
	Dpy19l4	271.245	242.985	299.505	1.23261	0.301712	0.237288	1
	Unc5d	941.31	707.173	1175.45	1.66218	0.733073	0.237427	1
	Prex2	535.417	369.812	701.023	1.89562	0.92267	0.237573	1
	Nr4a1	219.036	194.011	244.061	1.25797	0.331099	0.237885	1
	AABR07026969.1	1063.33	894.628	1232.03	1.37715	0.461682	0.237899	1
	Magi3	811.108	729.387	892.83	1.22408	0.291701	0.237915	1
	Oacyl	12.268	7.96205	16.574	2.08162	1.05771	0.238104	1
	Spopl	216.788	177.853	255.723	1.43784	0.5239	0.23822	1
	Plcd4	587.653	585.471	589.835	1.00745	0.0107132	0.238266	1
	Il12rb2	77.278	62.7777	91.7784	1.46196	0.547903	0.238267	1
	Errfi1	1432.22	1590.6	1273.83	0.800851	-0.320395	0.238282	1
	Wwp1	1085.17	966.559	1203.78	1.24543	0.316639	0.238296	1
	Ednra	375.911	315.671	436.151	1.38166	0.466407	0.238443	1
	Tle4	2410.28	2125.56	2695.01	1.26791	0.342447	0.238771	1
	Klf3	1315.62	1250.68	1380.55	1.10385	0.142539	0.238825	1
	Fam214a	908.42	830.823	986.018	1.1868	0.247074	0.238952	1
	Tlr7	30.5138	14.7466	46.281	3.13841	1.65003	0.238965	1
	Erbb2ip	2985.25	2732.15	3238.36	1.18528	0.245229	0.239021	1
	Ank1	484.945	420.609	549.28	1.30592	0.385061	0.239043	1
	Rnf217	473.45	427.833	519.068	1.21325	0.278876	0.239132	1
	Uchl1	25844.1	27551.8	24136.4	0.876036	-0.190939	0.239887	1
	Them6	368.85	397.009	340.692	0.858147	-0.220703	0.23993	1
	Kcnk13	87.2865	101.37	73.2032	0.722139	-0.469651	0.240007	1
	Rad18	357.352	406.321	308.383	0.758964	-0.397898	0.240118	1
	Prkch	50.5724	40.4639	60.681	1.49963	0.584611	0.240235	1
	Fndc3b	1168.59	952.159	1385.02	1.45461	0.540633	0.240287	1
	Syne2	1230.28	1159.28	1301.29	1.1225	0.166709	0.240324	1
	AABR07009397.1	1615.42	1878.74	1352.1	0.719686	-0.474561	0.240437	1
	Sdccag8	866.872	966.421	767.324	0.793985	-0.332816	0.240464	1
	Serpinb1a	62.346	64.8146	59.8774	0.923825	-0.114308	0.240554	1
	LOC500300	7.14608	5.31377	8.97838	1.68965	0.756721	0.240589	1
	AABR07051190.1	532.15	610.275	454.025	0.743967	-0.42669	0.240617	1
	Tcte1	2679.95	2900.63	2459.26	0.847835	-0.238144	0.240635	1
	Irx3	13.5718	11.134	16.0096	1.4379	0.523965	0.240766	1
	Tnfrsf10b	166.099	152.824	179.373	1.17372	0.231091	0.240771	1
	Ngfr	197.58	264.147	131.013	0.495983	-1.01164	0.240931	1
	Nacad	2310.85	2489.08	2132.63	0.856795	-0.222978	0.24095	1
	Wdfy3	4556.52	3597.74	5515.31	1.533	0.616353	0.241124	1
	Mapk4	1083.8	1021.05	1146.55	1.12292	0.16725	0.24123	1
	Lcn2	1601.45	1344.86	1858.04	1.38158	0.466322	0.241288	1
	Lacc1	45.6141	39.2539	51.9742	1.32405	0.404961	0.241463	1
	Tssk4	5.60424	3.25845	7.95002	2.43981	1.28677	0.24149	1
	Styx	67.9606	57.7659	78.1553	1.35297	0.436127	0.241534	1
	Birc7	24.2084	18.5801	29.8368	1.60584	0.68333	0.241631	1
	Lama5	2192.66	2025.91	2359.4	1.16461	0.219849	0.241669	1
	Grid2	163.604	139.657	187.551	1.34295	0.425401	0.24171	1
	Azin2	384.224	397.249	371.199	0.934423	-0.0978517	0.241793	1
	Ccdc136	847.891	792.315	903.468	1.14029	0.1894	0.241916	1
	Rps6ka3	1779.22	1569.85	1988.6	1.26674	0.341121	0.241994	1
	Tlr9	8.34509	5.80299	10.8872	1.87614	0.907764	0.242	1
	Phactr4	226.225	203.195	249.255	1.22668	0.29476	0.242043	1
	Pdrg1	1133.08	1328.88	937.288	0.705322	-0.503645	0.242056	1
	Ptpn22	15.5583	22.0549	9.06161	0.410866	-1.28326	0.242172	1
	RGD1310262	18.5582	23.9286	13.1877	0.551128	-0.859542	0.242178	1
	Lcp1	107.942	80.217	135.668	1.69126	0.758096	0.242194	1
	Gng7	2127.15	2198.67	2055.63	0.934944	-0.0970481	0.242246	1
	LOC100911867	204.952	210.316	199.588	0.948993	-0.0755304	0.242251	1
	Mgp	2462.22	2266.3	2658.14	1.1729	0.230079	0.242372	1
	Slc7a2	217.772	184.604	250.94	1.35934	0.442906	0.242387	1
	Nubp1	1054.39	1132	976.787	0.862889	-0.212753	0.242451	1
	Jun	4806.9	5051.68	4562.12	0.903091	-0.147057	0.24279	1
	Rn60_6_0964.4	27.7134	21.9538	33.473	1.5247	0.608528	0.242831	1
	Myl12a	2040.03	2050.19	2029.87	0.990089	-0.0143692	0.242834	1
	Fads3	1754.66	1913.4	1595.91	0.83407	-0.26176	0.242907	1
	Ppfia1	727.395	652.566	802.224	1.22934	0.297882	0.24295	1
	Tmem47	3469.95	3245.78	3694.11	1.13813	0.186665	0.243004	1
	Tle1	1075.37	942.158	1208.59	1.28279	0.35928	0.243156	1
	Dst	16549.7	13924.1	19175.2	1.37713	0.461664	0.243305	1
	Cpa6	13.8748	16.9739	10.7757	0.634838	-0.655539	0.243365	1
	Pdpr	605.955	511.746	700.163	1.36818	0.452262	0.243419	1
	Ipcef1	19.9919	11.1487	28.835	2.58639	1.37094	0.243477	1
	Alpl	127.26	122.584	131.935	1.07628	0.106055	0.243495	1
	Traip	268.625	282.389	254.861	0.902517	-0.147973	0.243499	1
	Vcl	2085.43	1934.49	2236.37	1.15605	0.209203	0.243677	1
	Tubb5	57042.4	63490.2	50594.5	0.796887	-0.327553	0.243734	1
	Ip6k2	2275.84	2351.33	2200.35	0.935791	-0.0957422	0.243739	1
	Ago2	1037.94	739.13	1336.76	1.80856	0.854838	0.2438	1
	Satb2	326.815	230.754	422.877	1.83259	0.873885	0.243925	1
	Gspt1	199.573	175.611	223.536	1.27291	0.348127	0.243929	1
	RGD1309036	407.614	433.513	381.716	0.880518	-0.183576	0.244033	1
	Stk32c	1390.74	1424.68	1356.79	0.952349	-0.0704384	0.24407	1
	AABR07005921.1	23.5342	21.5225	25.5459	1.18694	0.247248	0.244092	1
	Glrx	4110.39	4435.97	3784.8	0.853208	-0.229031	0.244116	1
	Snx9	455.839	439.628	472.049	1.07374	0.102651	0.244221	1
	Cmtm6	699.63	673.955	725.304	1.07619	0.105933	0.244259	1
	Ak6	410.531	465.358	355.705	0.764368	-0.38766	0.244327	1
	Btg1	1505.36	1514.31	1496.41	0.988175	-0.0171611	0.244416	1
	Pbxip1	5211.26	5003.83	5418.7	1.08291	0.114914	0.244427	1
	Thsd1	258.302	244.937	271.666	1.10913	0.149425	0.244724	1
	Ccdc50	971.939	812.63	1131.25	1.39208	0.477246	0.244844	1
	Dapk3	1161.36	1307.5	1015.22	0.77646	-0.365016	0.244893	1
	St6galnac3	378.615	430.998	326.233	0.756925	-0.401778	0.244905	1
	Klk4	6.11094	3.47275	8.74912	2.51936	1.33306	0.245186	1
	Cap2	1748.35	1511.94	1984.76	1.31272	0.392562	0.245279	1
	Pdzd8	2618.44	2277.44	2959.43	1.29946	0.377907	0.245542	1
	Hsd17b11	312.548	318.506	306.59	0.962587	-0.0550109	0.24612	1
	Unc13b	1293.72	1111.37	1476.07	1.32815	0.409421	0.246158	1
	Rn60_20_0041.1	34.8982	29.9403	39.8561	1.33119	0.412712	0.24628	1
	Cd1d1	61.0122	56.1011	65.9233	1.17508	0.23276	0.246323	1
	Arfip1	551.964	523.575	580.354	1.10844	0.148537	0.246464	1
	Pick1	1249.04	1337.67	1160.4	0.867476	-0.205104	0.246825	1
	Tmc6	143.527	136.631	150.423	1.10094	0.138733	0.247229	1
	AC142180.1	32.4675	37.994	26.941	0.709086	-0.495968	0.247393	1
	Uchl3	54.1608	66.3725	41.9492	0.632027	-0.661941	0.247425	1
	Slc25a45	15.3101	13.6794	16.9407	1.23841	0.308486	0.247525	1
	Atxn1l	526.677	431.048	622.306	1.4437	0.529775	0.247554	1
	AABR07050646.1	53.7045	49.3288	58.0802	1.17741	0.235618	0.247574	1
	Phf5a	718.244	826.754	609.733	0.737502	-0.439281	0.247615	1
	Slc25a34	146.294	139.357	153.231	1.09955	0.136918	0.247658	1
	LOC100360446	42.0772	34.563	49.5914	1.43481	0.52086	0.247682	1
	Chsy3	54.016	44.0158	64.0161	1.45439	0.540414	0.247683	1
	Il13ra1	13.5091	10.4783	16.5398	1.57848	0.658532	0.24783	1
	RGD1304929	20.8879	19.5698	22.206	1.1347	0.182315	0.24789	1
	Ier3	215.635	192.19	239.079	1.24398	0.31496	0.247972	1
	LOC100359600	955.601	1121.57	789.629	0.704038	-0.506275	0.247999	1
	Golim4	626.382	587.325	665.438	1.133	0.180144	0.2481	1
	Gm8444	331.046	382.529	279.563	0.730829	-0.452393	0.248336	1
	Casp7	244.56	236.918	252.202	1.06451	0.090192	0.248567	1
	Fndc1	981.59	832.26	1130.92	1.35885	0.442389	0.248607	1
	Col10a1	5.24648	3.4735	7.01945	2.02086	1.01497	0.248787	1
	Vcam1	1406.72	1117.96	1695.49	1.5166	0.600841	0.248924	1
	Tsga10ip	12.9868	8.50931	17.4643	2.05238	1.0373	0.249197	1
	Myo1b	475.859	410.575	541.143	1.31801	0.398367	0.249339	1
	Kcnc2	331.088	207.479	454.697	2.19153	1.13194	0.249382	1
	Rbm26	1768.46	1512.8	2024.13	1.33801	0.420083	0.24964	1
	Rbms1	284.358	254.601	314.115	1.23375	0.303052	0.249714	1
	Dock10	662.76	571.656	753.864	1.31874	0.399157	0.250132	1
	Rad21l1	6.7458	4.91178	8.57983	1.74679	0.804703	0.250174	1
	Mcat	586.527	644.796	528.257	0.819263	-0.287602	0.25022	1
	Pm20d2	176.211	144.826	207.596	1.43342	0.519458	0.250348	1
	Dusp16	169.919	155.295	184.543	1.18834	0.248943	0.250479	1
	Galnt1	2303.02	2223.09	2382.95	1.07191	0.100179	0.250563	1
	Slc15a3	30.0729	17.8083	42.3375	2.3774	1.24939	0.250574	1
	Kif24	245.562	211.799	279.326	1.31882	0.399249	0.250689	1
	Zfp821	1335.73	1444.32	1227.13	0.849624	-0.235104	0.250698	1
	Calr4	35.6925	30.6852	40.6998	1.32637	0.40748	0.250826	1
	Zdhhc20	528.082	474.354	581.811	1.22653	0.294585	0.251216	1
	Mcrs1	2611.5	2880.86	2342.15	0.813002	-0.298668	0.251298	1
	Mcm8	125.512	111.192	139.832	1.25757	0.330633	0.251349	1
	F2	10.9212	13.834	8.00841	0.578891	-0.788636	0.251478	1
	Bbip1	167.034	197.621	136.447	0.690449	-0.534393	0.251561	1
	Gorab	399.512	358.284	440.74	1.23014	0.298823	0.251628	1
	Slc17a9	14.3224	10.5165	18.1284	1.7238	0.785591	0.251661	1
	Arhgef12	3060.26	2543.72	3576.8	1.40613	0.491731	0.251711	1
	Col19a1	157.368	90.9171	223.818	2.46178	1.2997	0.251717	1
	Dtx3l	207.896	173.193	242.6	1.40075	0.4862	0.251808	1
	Tanc1	1502.66	1233.38	1771.94	1.43665	0.52271	0.251922	1
	Fam83d	133.109	159.238	106.98	0.671828	-0.573837	0.252006	1
	Ikbke	53.9187	53.3316	54.5058	1.02202	0.0314196	0.252013	1
	Zfp944	25.4844	21.8328	29.136	1.33451	0.416311	0.252078	1
	Sept6	2050.89	2188.78	1913.01	0.874009	-0.19428	0.252136	1
	Prdm11	374.32	286.655	461.985	1.61164	0.688528	0.252185	1
	Mmrn1	9.74979	6.78	12.7196	1.87604	0.907695	0.252438	1
	Csnk1g1	183.134	144.839	221.429	1.52879	0.612392	0.252476	1
	Nxph4	171.822	189.622	154.022	0.812257	-0.299992	0.252587	1
	Runx1	48.8595	40.0837	57.6354	1.43788	0.523938	0.252641	1
	Lrrc26	16.42	19.8902	12.9498	0.651067	-0.619122	0.252664	1
	Sfmbt2	45.271	39.0138	51.5282	1.32077	0.401381	0.252809	1
	Cebpd	700.987	635.502	766.472	1.20609	0.270338	0.252964	1
	Fam160a1	31.9468	27.3378	36.5558	1.33719	0.419202	0.253067	1
	Cyb561d1	132.027	119.229	144.826	1.21468	0.280581	0.253357	1
	Chmp4c	34.396	34.3837	34.4083	1.00072	0.00103363	0.253521	1
	Polm	88.9532	91.3827	86.5237	0.946828	-0.0788257	0.253611	1
	Pfkfb2	1325.43	1107.81	1543.04	1.39287	0.478063	0.253653	1
	Gas1	216.036	213.6	218.473	1.02282	0.0325445	0.253669	1
	Susd4	5619.92	5664.46	5575.38	0.984274	-0.0228684	0.253703	1
	Fam171b	3202.23	2569.76	3834.69	1.49223	0.577473	0.253717	1
	Flrt2	520.778	450.561	590.995	1.31169	0.391423	0.253811	1
	Il12a	6.03818	8.96503	3.11133	0.347052	-1.52678	0.253937	1
	Rbpj	1117.28	1054.56	1179.99	1.11893	0.162125	0.254223	1
	Slc29a4	3785.02	3881.61	3688.43	0.950233	-0.0736465	0.25428	1
	Slc25a32	376.044	337.33	414.758	1.22953	0.298106	0.254439	1
	Rassf3	571.346	514.411	628.281	1.22136	0.288487	0.254499	1
	RGD1563482	148.572	156.891	140.254	0.893958	-0.161721	0.254539	1
	Ankrd6	2439.61	2263.89	2615.34	1.15524	0.208191	0.254614	1
	Fam105a	282.57	314.536	250.603	0.796737	-0.327824	0.254723	1
	Tmem170b	278.2	201.71	354.69	1.75842	0.814275	0.254747	1
	Bmp7	794.002	811.442	776.561	0.957014	-0.0633882	0.254784	1
	Arl13b	430.529	394.027	467.03	1.18527	0.245221	0.254825	1
	Pcdh18	518.167	563.014	473.32	0.84069	-0.250355	0.254972	1
	Slc43a2	2010.41	1723.99	2296.83	1.33227	0.413888	0.255047	1
	Tacr2	32.6112	38.355	26.8674	0.700493	-0.513558	0.255062	1
	Lemd1	24.0415	29.3448	18.7382	0.638551	-0.647125	0.255242	1
	Prss55	37.3584	40.2604	34.4563	0.855838	-0.22459	0.255623	1
	Camkmt	248.629	282.854	214.405	0.758009	-0.399714	0.255631	1
	Gdf15	346.265	276.96	415.57	1.50047	0.585414	0.255651	1
	Slc16a1	2361.7	2163.61	2559.78	1.1831	0.242577	0.255746	1
	Ppip5k2	812.255	715.029	909.481	1.27195	0.347041	0.255905	1
	Mycn	695.308	708.278	682.337	0.963375	-0.053831	0.25591	1
	Exosc7	444.492	498.569	390.416	0.783073	-0.352782	0.255928	1
	Ift46	859.701	1022.09	697.309	0.682238	-0.551654	0.255964	1
	Gtf2ird1	130.346	143.604	117.089	0.815363	-0.294485	0.256014	1
	Pla2g5	95.0668	97.3145	92.8191	0.953805	-0.0682333	0.256052	1
	Flywch1	2391.82	2540.06	2243.58	0.883278	-0.17906	0.256246	1
	Ccdc88c	1069.1	996.768	1141.43	1.14513	0.195514	0.256248	1
	Fam155b	998.128	1041.57	954.688	0.916587	-0.125657	0.256304	1
	Zfand2a	2413.68	2522.17	2305.19	0.913973	-0.129777	0.256446	1
	Dhcr7	3559.53	3609.64	3509.43	0.97224	-0.0406156	0.256683	1
	Efna2	249.225	258.33	240.12	0.929508	-0.105461	0.256721	1
	Heg1	2128.12	1854.02	2402.22	1.29568	0.373712	0.256822	1
	Sorcs1	1502.11	1360.23	1643.99	1.20861	0.27335	0.256992	1
	Tacr3	325.716	346.899	304.533	0.877871	-0.187919	0.257064	1
	AABR07066529.3	102.575	109.34	95.8095	0.876255	-0.190578	0.257066	1
	Ubac1	1846.39	2062.28	1630.49	0.790625	-0.338935	0.257152	1
	Sertad1	385.731	379.477	391.984	1.03296	0.0467849	0.257263	1
	Zc3h13	1975.98	1745.16	2206.79	1.26452	0.33859	0.257341	1
	Zswim3	531.526	559.329	503.724	0.900586	-0.151064	0.257592	1
	Scai	435.22	345.576	524.864	1.51881	0.602939	0.257633	1
	LOC100910447	367.889	428.525	307.253	0.717002	-0.47995	0.257749	1
	Rfc4	287.391	339.878	234.904	0.691142	-0.532946	0.257866	1
	Trim13	257.032	289.281	224.783	0.777038	-0.363943	0.258123	1
	Itga7	417.475	430.247	404.704	0.940632	-0.0882977	0.258201	1
	SCARNA7	4.57863	2.85329	6.30397	2.20937	1.14363	0.258339	1
	Ddr2	762.839	685.992	839.686	1.22405	0.291657	0.258427	1
	LOC100360002	799.335	920.734	677.937	0.7363	-0.441634	0.258439	1
	Rbm24	177.475	167.775	187.175	1.11563	0.157854	0.258518	1
	Lsm3	625.44	713.46	537.42	0.753259	-0.408782	0.25852	1
	Map1lc3a	6367.43	6920.66	5814.2	0.840122	-0.251329	0.258798	1
	Ccnd2	5975.33	4836.92	7113.74	1.47072	0.556519	0.259052	1
	Tepp	42.8748	44.2696	41.4799	0.936984	-0.093903	0.25934	1
	Jrk	278.109	248.668	307.55	1.23679	0.306599	0.25949	1
	Mcam	369.746	398.608	340.885	0.85519	-0.225683	0.259512	1
	Emx2	977.866	964.611	991.121	1.02748	0.0391142	0.259566	1
	AABR07044980.1	5.63374	3.43529	7.83218	2.27992	1.18898	0.259636	1
	Ano1	15.1709	12.3563	17.9855	1.45558	0.541597	0.259693	1
	Pqlc1	1432.09	1533.61	1330.57	0.867603	-0.204892	0.2597	1
	Jund	3333.25	3650.42	3016.09	0.826232	-0.275382	0.259825	1
	Itga1	86.1934	73.2069	99.18	1.35479	0.43807	0.260048	1
	AABR07058267.1	46.3637	35.5602	57.1672	1.60762	0.684922	0.26019	1
	Cfap54	130.066	113.173	146.96	1.29854	0.376891	0.260323	1
	Naaa	60.6878	54.9623	66.4133	1.20834	0.273029	0.260464	1
	Gng3	4442.65	4652.03	4233.27	0.909982	-0.13609	0.260586	1
	Cc2d1b	673.106	645.413	700.8	1.08582	0.11878	0.260615	1
	Xylt1	799.292	608.322	990.263	1.62786	0.702978	0.26086	1
	1500009L16Rik	589.506	648.629	530.382	0.817697	-0.290362	0.260895	1
	Mob1b	832.225	682.516	981.935	1.4387	0.524764	0.260907	1
	Mcts1	1192.33	1370.22	1014.43	0.740339	-0.433743	0.260972	1
	Rtn4r	1922.45	1912.8	1932.09	1.01008	0.0144747	0.261086	1
	Alox5	40.4722	36.6335	44.3108	1.20957	0.274496	0.261422	1
	Jmjd1c	2782.55	2355.44	3209.66	1.36266	0.446424	0.261584	1
	Arhgap36	13.0435	10.4826	15.6043	1.48859	0.573951	0.261589	1
	Fabp5	9273.86	10920.8	7626.92	0.698385	-0.517905	0.261918	1
	Psmb5	2403.85	2727.09	2080.61	0.762943	-0.390354	0.261951	1
	AABR07032045.1	95.004	70.1326	119.875	1.70927	0.77338	0.262	1
	Ppp1r2	3823.39	3438.03	4208.75	1.22418	0.291812	0.262006	1
	Serf1	807.427	930.995	683.858	0.734545	-0.445078	0.262009	1
	Xpo4	843.513	741.691	945.336	1.27457	0.350009	0.26201	1
	St3gal4	933.957	868.476	999.437	1.15079	0.202629	0.262417	1
	Jdp2	348.698	390.278	307.118	0.786921	-0.34571	0.262434	1
	Helz	571.92	490.576	653.264	1.33163	0.413189	0.262502	1
	Gpr173	600.822	633.944	567.699	0.895503	-0.15923	0.262572	1
	Pithd1	3419.63	3743.76	3095.49	0.826839	-0.274321	0.262742	1
	Lcp2	40.7895	32.6704	48.9085	1.49703	0.582101	0.262886	1
	Dbndd1	659.776	721.597	597.955	0.828654	-0.271159	0.26298	1
	Itih2	18.5035	24.3622	12.6448	0.519033	-0.946103	0.263007	1
	Zbtb7b	341.137	326.292	355.981	1.09099	0.125639	0.263017	1
	Matn3	25.5227	23.742	27.3034	1.15001	0.201643	0.263043	1
	Bbx	185.885	154.882	216.887	1.40034	0.485776	0.263065	1
	Cd74	43.5127	38.1369	48.8886	1.28192	0.35831	0.263108	1
	Lrrc1	163.018	165.046	160.989	0.975423	-0.0358996	0.263206	1
	Rapgefl1	2993.28	2978.53	3008.04	1.00991	0.014221	0.263317	1
	Rn60_17_0453.2	14.2246	10.4976	17.9515	1.71005	0.774038	0.263541	1
	Fam126b	577.729	480.633	674.826	1.40404	0.48958	0.263647	1
	Itgal	60.0474	34.2991	85.7956	2.50139	1.32273	0.263678	1
	LOC100365810	10.7757	9.32528	12.2262	1.31108	0.390753	0.263821	1
	Slc7a5	10892.4	10690	11094.9	1.03787	0.0536267	0.264017	1
	Mdp1	627.688	690.302	565.074	0.81859	-0.288788	0.264196	1
	Dnah11	599.733	565.507	633.96	1.12105	0.164846	0.264389	1
	Rhoq	1200.67	1172.15	1229.2	1.04867	0.0685567	0.264415	1
	Cd40	55.5111	42.6025	68.4197	1.606	0.683474	0.264546	1
	Alg6	163.465	143.472	183.459	1.27871	0.354692	0.264933	1
	Chrdl1	645.437	589.614	701.259	1.18935	0.250176	0.264941	1
	Psmd8	4087.31	4553.26	3621.36	0.795333	-0.330369	0.264997	1
	Nyap2	267.125	186.699	347.55	1.86155	0.896505	0.265033	1
	Tubb3	35575.4	37685.4	33465.3	0.888017	-0.171341	0.265075	1
	Tlr10	5.77563	3.80148	7.74977	2.03862	1.02759	0.265127	1
	Tmem17	468.74	527.704	409.777	0.776528	-0.36489	0.265164	1
	Gprc5b	3026.86	2894.31	3159.4	1.09159	0.126427	0.265176	1
	AABR07047598.1	13.9433	8.50565	19.381	2.27861	1.18815	0.265195	1
	Iqgap2	2206.53	1905.18	2507.88	1.31635	0.396538	0.265212	1
	Uprt	200.743	159.068	242.418	1.52399	0.607851	0.265216	1
	Itgb6	29.542	28.6258	30.4582	1.06401	0.0895168	0.265241	1
	Cacnb3	5616.74	5720.32	5513.15	0.963783	-0.053219	0.26556	1
	Ttll11	236.223	242.84	229.607	0.945507	-0.0808398	0.265576	1
	Csf2rb	29.5799	18.8779	40.2819	2.13381	1.09343	0.265593	1
	Acot5	11.6255	14.7876	8.46328	0.572322	-0.805102	0.265699	1
	Ssfa2	1289.51	1218.27	1360.76	1.11696	0.15958	0.265735	1
	Bola1	241.99	275.886	208.094	0.754277	-0.406833	0.265747	1
	Secisbp2l	4153.23	3498.98	4807.48	1.37397	0.458346	0.26588	1
	Mpp3	2282.74	2386.03	2179.44	0.913416	-0.130656	0.265886	1
	Ppp1r3c	789.382	907.309	671.455	0.740051	-0.434303	0.26598	1
	Vstm5	41.2134	44.4759	37.9509	0.853293	-0.228887	0.265983	1
	Prr16	51.8124	44.981	58.6437	1.30375	0.382663	0.266066	1
	Atf3	256.057	211.319	300.795	1.42342	0.509358	0.266071	1
	Fam135b	320.804	232.169	409.439	1.76354	0.818477	0.266093	1
	Serp2	1593.25	1683.21	1503.3	0.893113	-0.163085	0.266228	1
	LOC500877	75.9042	73.3024	78.506	1.07099	0.0989429	0.266293	1
	Diap2	55.1094	45.6963	64.5225	1.41199	0.497726	0.266373	1
	Snrpb	2029.14	2306.99	1751.29	0.759124	-0.397593	0.266398	1
	Dynlrb1	6083.37	6780.22	5386.51	0.794444	-0.331982	0.266436	1
	Map2k6	545.222	610.798	479.645	0.785276	-0.348729	0.266572	1
	Slco4c1	58.9605	40.4644	77.4565	1.91419	0.936734	0.266603	1
	Npr2	692.773	697.008	688.538	0.987847	-0.0176399	0.266738	1
	Ednrb	2944.72	2626.84	3262.59	1.24202	0.312693	0.26675	1
	Tsku	918.729	894.314	943.144	1.0546	0.0766971	0.266764	1
	Jmy	325.301	258.695	391.907	1.51494	0.599259	0.266953	1
	Stmn3	18211.5	19295.6	17127.4	0.887629	-0.171971	0.267039	1
	Shc1	1050.82	1029.89	1071.75	1.04065	0.0574793	0.267076	1
	Atl3	300.782	268.637	332.928	1.23932	0.309551	0.267135	1
	Itgb7	6.73439	10.0701	3.39871	0.337505	-1.56702	0.267179	1
	Fas	362.38	324.472	400.288	1.23366	0.302946	0.267222	1
	Prima1	119.19	90.1061	148.274	1.64555	0.718569	0.267231	1
	Cd44	4469.14	3979.31	4958.97	1.24619	0.317522	0.26747	1
	Tfap2a	21.5326	20.6592	22.4061	1.08456	0.117112	0.267675	1
	Anks4b	36.6182	44.3188	28.9177	0.652492	-0.615968	0.267684	1
	LOC680227	670.026	517.492	822.56	1.58951	0.668584	0.267701	1
	RGD1309995	1267.97	1090.17	1445.76	1.32618	0.407279	0.267777	1
	Itpa	2682.51	2958.62	2406.39	0.813349	-0.298053	0.267791	1
	Shd	240.901	236.352	245.449	1.03849	0.0544831	0.267794	1
	Nom1	815.618	721.136	910.1	1.26204	0.335754	0.2679	1
	AABR07071287.1	52.62	74.409	30.8309	0.414344	-1.2711	0.267901	1
	Tmem158	1489.02	1510.06	1467.98	0.972137	-0.0407691	0.267907	1
	AABR07031963.1	6.04797	4.19027	7.90568	1.88668	0.915848	0.267937	1
	Kmt2a	2140.4	1654.15	2626.66	1.58792	0.667138	0.268049	1
	Cib2	1397.35	1538.67	1256.03	0.816308	-0.292815	0.26815	1
	Atp11a	2096.67	1863.77	2329.57	1.24992	0.321839	0.268239	1
	Myh9	98.8706	89.4565	108.285	1.21047	0.27557	0.268289	1
	Mlxip	775.389	664.679	886.097	1.33312	0.414807	0.268433	1
	Lyn	545.162	470.151	620.173	1.31909	0.399546	0.268565	1
	Rpf2	972.394	1085.72	859.071	0.791247	-0.3378	0.2686	1
	Steap2	362.589	326.399	398.78	1.22176	0.288957	0.268707	1
	Psmb6	564.994	653.652	476.337	0.728732	-0.45654	0.268815	1
	Ywhah	32329.5	33101.9	31557.1	0.953331	-0.0689504	0.268882	1
	Dock7	2571.65	2401.21	2742.09	1.14196	0.191518	0.269176	1
	Fam220a	1248.99	1353.09	1144.9	0.846138	-0.241035	0.269811	1
	Vtn	36.1825	46.9047	25.4602	0.542808	-0.881486	0.269969	1
	Tp53rk	143.524	155.098	131.95	0.850756	-0.233182	0.27003	1
	Rtl1	30.8829	27.0233	34.7424	1.28565	0.362496	0.270168	1
	Mllt6	1568.8	1269.48	1868.13	1.47158	0.557363	0.270285	1
	Tmem229b	4153.86	4318.15	3989.57	0.923906	-0.114182	0.270591	1
	Plp1	1310.46	1120.86	1500.07	1.33833	0.42043	0.270649	1
	Dync1i1	8657.82	8770.95	8544.69	0.974204	-0.0377043	0.270654	1
	Srxn1	319.157	282.112	356.202	1.26263	0.336427	0.270663	1
	Cdkn2aip	543.846	506.259	581.434	1.14849	0.19974	0.270724	1
	Hist1h4b	558.927	574.666	543.187	0.945223	-0.0812739	0.271008	1
	AABR07034532.1	168.893	145.963	191.822	1.31419	0.39417	0.271034	1
	Samd11	101.249	91.9026	110.596	1.20341	0.267124	0.271363	1
	Zbtb45	750.981	811.615	690.347	0.850584	-0.233474	0.271456	1
	Arsj	19.9362	16.898	22.9745	1.3596	0.443183	0.271501	1
	Mpzl2	114.94	115.046	114.835	0.998164	-0.00265168	0.271502	1
	Ifih1	254.812	233.364	276.26	1.18381	0.243439	0.271678	1
	Orc6	321.623	349.849	293.398	0.838643	-0.253871	0.271759	1
	Wasl	1562.85	1377.36	1748.34	1.26934	0.344077	0.271825	1
	Znf750	11.9393	10.1268	13.7518	1.35796	0.441445	0.27189	1
	RT1-A1	423.3	410.679	435.92	1.06146	0.0860537	0.271971	1
	Stox2	2057.54	1612.54	2502.55	1.55194	0.63407	0.272079	1
	Cdc73	356.02	322.985	389.055	1.20456	0.268508	0.272155	1
	Erap1	1108.61	1081.96	1135.26	1.04926	0.0693713	0.272256	1
	Fam163b	1672.85	1721.85	1623.85	0.943084	-0.0845417	0.272264	1
	Smim3	327.218	332.043	322.393	0.970939	-0.0425469	0.272295	1
	Gpatch2	286.456	241.57	331.342	1.37162	0.455882	0.272354	1
	Cmtm4	642.524	519.753	765.295	1.47242	0.558189	0.272513	1
	Sts	280.703	272.558	288.848	1.05977	0.0837471	0.27266	1
	Ptms	24347	26129.6	22564.4	0.863559	-0.211634	0.272689	1
	Zwint	62401.9	65335.4	59468.3	0.9102	-0.135744	0.2727	1
	Nell2	25844.3	25724	25964.7	1.00936	0.0134378	0.272812	1
	Dsp	150.584	131.174	169.994	1.29594	0.374004	0.272858	1
	Gpr137b	213.388	200.512	226.265	1.12844	0.17433	0.273304	1
	Rrp7a	582.651	647.93	517.373	0.798501	-0.324634	0.27334	1
	Tnpo1	3581.67	3331.79	3831.55	1.15	0.201628	0.273605	1
	Tcf4	4182.85	3407.31	4958.4	1.45522	0.541242	0.273715	1
	Bmp2	111.707	99.4787	123.935	1.24584	0.317124	0.273942	1
	Cpt2	451.781	463.56	440.001	0.949176	-0.0752521	0.274083	1
	Vps13c	1153.2	876.552	1429.86	1.63123	0.705961	0.274166	1
	Hivep1	1173.5	1015.05	1331.94	1.31218	0.391971	0.274201	1
	RGD1305464	735.462	771.985	698.939	0.905379	-0.143407	0.274272	1
	Nadk2	1104.67	1067.74	1141.61	1.06917	0.0964977	0.274339	1
	Acot11	14.2281	13.8914	14.5648	1.04847	0.06829	0.274348	1
	Tceal1	955.803	1026.67	884.932	0.86194	-0.21434	0.274364	1
	Hexb	1526.97	1516.63	1537.31	1.01363	0.0195316	0.274582	1
	Smim18	237.677	255.271	220.083	0.862153	-0.213983	0.274966	1
	Cpne3	397.821	361.269	434.372	1.20235	0.26586	0.274974	1
	Hspa1b	84.3928	93.4592	75.3263	0.805981	-0.311183	0.275113	1
	Hipk3	1176.01	943.956	1408.06	1.49166	0.576921	0.275151	1
	RGD1561381	995.671	1090.46	900.882	0.826147	-0.275529	0.275247	1
	Slc27a4	3863.59	4110.64	3616.54	0.8798	-0.184752	0.275335	1
	Snap47	842.72	907.126	778.313	0.857999	-0.220951	0.275344	1
	Atat1	4463.14	4851.19	4075.09	0.840018	-0.251509	0.275348	1
	Arhgap5	2638.66	2343.88	2933.45	1.25154	0.323701	0.275395	1
	Fmo1	38.8807	55.4396	22.3217	0.402631	-1.31247	0.275592	1
	Ehbp1l1	1085.66	1152.89	1018.42	0.883364	-0.178921	0.27572	1
	Psmc5	3890.62	4348.19	3433.05	0.789535	-0.340924	0.275816	1
	Stx1a	6663.17	6960.88	6365.45	0.914461	-0.129007	0.275982	1
	Ccdc88a	2626.63	2184.44	3068.82	1.40485	0.490416	0.276081	1
	Commd6	528.436	592.317	464.555	0.784302	-0.350519	0.276178	1
	Cnksr3	159.491	158.068	160.913	1.018	0.0257318	0.276197	1
	Mt1	1155.47	1078.56	1232.38	1.14262	0.192345	0.276318	1
	Ppil1	460.16	493.273	427.046	0.86574	-0.207994	0.27639	1
	Nme1	3568.65	3998.29	3139.02	0.78509	-0.349071	0.276434	1
	Lss	1917.9	1825.28	2010.52	1.10149	0.139454	0.276476	1
	Rbp1	495.864	649.568	342.16	0.52675	-0.924809	0.276502	1
	Cd14	208.311	199.406	217.217	1.08932	0.12343	0.276535	1
	LOC683897	484.934	539.811	430.057	0.79668	-0.327928	0.276593	1
	Rab4b	2162.25	2222.59	2101.91	0.945701	-0.0805435	0.276605	1
	Prickle1	1382.58	1201.59	1563.56	1.30125	0.379895	0.276637	1
	AABR07003537.1	213.868	197.283	230.452	1.16813	0.224198	0.276683	1
	Rab9b	2282.52	2278.91	2286.14	1.00317	0.00457087	0.27673	1
	Fbll1	1884.54	1968.78	1800.29	0.914417	-0.129076	0.276832	1
	LOC303566	39.1174	52.0607	26.1742	0.502763	-0.992051	0.276859	1
	Rn60_20_0032.5	378.282	411.998	344.566	0.83633	-0.257856	0.276932	1
	Pdk2	1224.03	1158.4	1289.66	1.11331	0.154855	0.276934	1
	AABR07052085.1	722.866	810.23	635.503	0.784349	-0.350433	0.276964	1
	Ddx39a	668.459	766.633	570.284	0.743881	-0.426855	0.277	1
	St8sia2	203.418	154.277	252.56	1.63706	0.711104	0.277161	1
	Pax6	280.685	284.205	277.165	0.975229	-0.0361873	0.277207	1
	Tubb4a	15709.3	15966.4	15452.2	0.967798	-0.0472217	0.277235	1
	Rai14	796.057	765.871	826.243	1.07883	0.109465	0.277445	1
	Slc25a15	298.218	288.475	307.961	1.06755	0.0943008	0.27749	1
	AABR07018116.1	21.4201	23.8552	18.9851	0.795848	-0.329435	0.277578	1
	AABR07040622.1	55.4625	65.2663	45.6587	0.699575	-0.51545	0.277617	1
	Clic2	25.5465	34.0133	17.0797	0.502147	-0.993819	0.277634	1
	Kctd13	3082.75	3175.34	2990.16	0.941682	-0.0866879	0.277674	1
	Samd10	680.3	734.656	625.944	0.852023	-0.231035	0.277724	1
	Tlr6	36.1011	33.7608	38.4415	1.13864	0.187315	0.277761	1
	Cisd3	390.929	440.518	341.339	0.774858	-0.367996	0.27781	1
	Ttc7a	389.879	358.636	421.122	1.17423	0.231716	0.277844	1
	Txnl4a	960.961	1101.51	820.414	0.744809	-0.425057	0.277865	1
	Nlrc5	124.792	109.868	139.717	1.27168	0.346741	0.278	1
	LOC100912399	20.2372	15.4168	25.0576	1.62534	0.70074	0.278008	1
	Aadat	167.694	162.677	172.71	1.06167	0.0863417	0.278138	1
	Sertm1	2803.57	2836.06	2771.08	0.977089	-0.0334382	0.278153	1
	RGD1307391	1295.82	1311.42	1280.22	0.976207	-0.0347415	0.278169	1
	Abhd8	3553.2	3776.82	3329.58	0.881582	-0.181833	0.278425	1
	Nfe2l2	2258.77	2086.31	2431.23	1.16532	0.22073	0.278795	1
	LOC102555727	887.381	970.604	804.158	0.828513	-0.271403	0.278803	1
	Sirpa	7056.87	6351.24	7762.49	1.2222	0.289482	0.278807	1
	Tmem55b	2074.15	2068.35	2079.95	1.00561	0.00807035	0.278809	1
	Agap1	2829.44	2402.27	3256.61	1.35564	0.438976	0.278875	1
	Scx	51.9873	52.0566	51.918	0.997339	-0.00384466	0.279038	1
	Vezf1	1296.1	1222.93	1369.27	1.11966	0.163063	0.279138	1
	Adora2a	54.0929	55.4622	52.7235	0.950619	-0.0730608	0.279198	1
	Stra6	160.978	223.949	98.0066	0.437629	-1.19222	0.279227	1
	Arrb2-ps	584.193	603.368	565.019	0.936443	-0.0947373	0.279247	1
	Tm7sf2	1216.44	1235.87	1197.02	0.968559	-0.0460884	0.279282	1
	Tmem194	41.939	38.2148	45.6633	1.19491	0.256906	0.279412	1
	Slc25a25	2151.4	2233.98	2068.82	0.926073	-0.110802	0.27953	1
	Ankrd34b	146.728	85.8055	207.65	2.42	1.27501	0.279595	1
	Nmi	144.768	142.734	146.802	1.02849	0.0405336	0.279669	1
	Dot1l	1456.6	1291.69	1621.51	1.25533	0.328071	0.2797	1
	Klhl28	400.23	313.858	486.602	1.55039	0.632627	0.279745	1
	Gria4	1306.28	1073.66	1538.9	1.43332	0.519364	0.279745	1
	Sgk3	55.1943	50.6161	59.7724	1.1809	0.239881	0.279758	1
	Mir1188	4.41371	2.99347	5.83396	1.9489	0.962657	0.280289	1
	LOC100909609	1805.84	1675.44	1936.24	1.15566	0.208717	0.280291	1
	Usp18	211.682	189.497	233.866	1.23414	0.303503	0.280327	1
	Pofut1	570.199	525.033	615.365	1.17205	0.229035	0.280337	1
	Kat2b	60.3754	56.1236	64.6273	1.15152	0.203537	0.280407	1
	Csde1	895.087	1028.8	761.372	0.740057	-0.434291	0.280446	1
	Wnt5b	32.0162	43.2109	20.8214	0.481856	-1.05333	0.280536	1
	Hlf	39.9401	33.8825	45.9977	1.35756	0.44102	0.280824	1
	Sgsh	63.4168	58.3444	68.4892	1.17388	0.231283	0.280861	1
	Lrfn3	1156.68	1241.64	1071.72	0.86315	-0.212316	0.28092	1
	Yes1	404.458	368.541	440.375	1.19491	0.256906	0.281109	1
	Cyp11a1	6.63887	8.72493	4.55282	0.521818	-0.938383	0.281152	1
	Ttyh2	421.794	410.775	432.813	1.05365	0.0753969	0.281242	1
	Fkbp14	272.763	269.691	275.834	1.02278	0.0324935	0.281258	1
	Aldh1a2	309.651	428.41	190.892	0.445582	-1.16624	0.281331	1
	Hecw2	1209.12	929.746	1488.5	1.60098	0.678953	0.281589	1
	Cd320	535.302	545.203	525.401	0.963679	-0.0533755	0.28182	1
	Inpp4b	70.788	54.3273	87.2486	1.60598	0.683453	0.281845	1
	Ggta1	166.181	163.971	168.391	1.02696	0.0383729	0.281895	1
	Notch2	1562.84	1423.54	1702.14	1.19571	0.257872	0.281922	1
	Mgst1	1252.13	1261.41	1242.85	0.985284	-0.0213888	0.281948	1
	Spaca3	11.6779	13.5732	9.78251	0.720722	-0.472486	0.282156	1
	Psmd4	3456.86	3930.18	2983.53	0.759134	-0.397574	0.28216	1
	Prr19	5.50102	7.50136	3.50069	0.466674	-1.09951	0.282396	1
	Trim25	323.445	267.483	379.406	1.41843	0.504298	0.282397	1
	Galnt15	73.9494	64.3314	83.5675	1.29902	0.377419	0.282423	1
	Itgb4	189.906	191.561	188.251	0.982726	-0.0251396	0.282532	1
	Dpf1	2785.06	2867.47	2702.65	0.942521	-0.085403	0.282584	1
	Pdilt	10.9792	9.97952	11.9788	1.20034	0.263444	0.282718	1
	Ogdhl	910.271	840.927	979.615	1.16492	0.220235	0.282733	1
	Col8a1	2055.46	1752.09	2358.83	1.3463	0.428997	0.283201	1
	FAM187A	216.798	204.8	228.797	1.11717	0.159852	0.283234	1
	Mdga2	411.12	354.851	467.389	1.31715	0.397414	0.283693	1
	Rn60_X_0752.3	956.13	752.313	1159.95	1.54184	0.624656	0.283699	1
	Hyal1	389.983	338.491	441.476	1.30425	0.383219	0.283729	1
	Mrpl48	1088.33	1246.47	930.183	0.746251	-0.422267	0.283811	1
	Dolpp1	834.649	912.913	756.386	0.82854	-0.271356	0.283899	1
	Ddx59	384.413	423.911	344.914	0.813648	-0.297523	0.283933	1
	AABR07051808.1	13.0077	9.95465	16.0607	1.61339	0.690092	0.284041	1
	Myo5c	108.734	109.654	107.814	0.983217	-0.024419	0.284043	1
	Vwa8	21.9649	18.5575	25.3724	1.36723	0.451259	0.284105	1
	Tshz1	776.882	706.09	847.674	1.20052	0.263658	0.284106	1
	AABR07026311.1	1376.92	1563.52	1190.31	0.761305	-0.393454	0.284125	1
	Nutm1	44.4256	49.0442	39.807	0.811654	-0.301063	0.284529	1
	Tnik	4507.63	3623.07	5392.18	1.48829	0.573657	0.284552	1
	Kcnk16	17.3059	24.5497	10.0621	0.409865	-1.28678	0.284613	1
	Bmx	14.9346	20.4914	9.37769	0.45764	-1.12772	0.284618	1
	AABR07024106.1	184.116	210.734	157.497	0.747374	-0.420097	0.284622	1
	U7	10.1848	6.78711	13.5826	2.00123	1.00089	0.284625	1
	Zfp367	340.312	320.183	360.442	1.12574	0.170871	0.284725	1
	Zc4h2	656.575	727.894	585.256	0.80404	-0.314661	0.284825	1
	Car5b	70.5821	65.5863	75.578	1.15234	0.204571	0.28484	1
	Fgf9	206.041	209.673	202.41	0.965359	-0.0508624	0.284906	1
	Nabp1	434.487	382.03	486.944	1.27462	0.350069	0.285072	1
	Wnt5a	712.278	682.253	742.303	1.08802	0.121702	0.285128	1
	Sft2d2	1606.97	1593.34	1620.59	1.0171	0.0244653	0.285209	1
	Stoml1	1530.56	1634.57	1426.55	0.872737	-0.196382	0.285427	1
	Leng1	272.938	297.154	248.721	0.837013	-0.256678	0.285483	1
	AABR07042792.1	1188.01	1316.34	1059.68	0.805024	-0.312897	0.285673	1
	Trpm1	17.2112	17.044	17.3783	1.01961	0.0280214	0.285676	1
	Atp5j2	3986.6	4641.06	3332.14	0.71797	-0.478005	0.28589	1
	Nipbl	2276.67	2042.81	2510.53	1.22896	0.297439	0.285954	1
	Zdhhc22	288.188	187.155	389.221	2.07967	1.05635	0.285978	1
	Erf	1002.4	972.787	1032.02	1.06089	0.0852723	0.286349	1
	Prss23	556.818	555.652	557.985	1.0042	0.0060438	0.286435	1
	Utp20	1008.93	906.796	1111.07	1.22527	0.293104	0.286526	1
	Sugt1	1477.17	1683.34	1271	0.755044	-0.405367	0.28663	1
	Zbtb20	967.192	674.054	1260.33	1.86978	0.902866	0.286749	1
	Arr3	17.728	12.9205	22.5356	1.74418	0.802549	0.28685	1
	Scp2	5984.58	5777.42	6191.73	1.07171	0.0999175	0.2869	1
	Smpdl3a	910.052	876.95	943.155	1.07549	0.104999	0.286984	1
	Srgap1	1014.44	835.599	1193.28	1.42805	0.514048	0.286989	1
	Plk2	3805.03	3441.42	4168.63	1.21131	0.27657	0.287143	1
	Bod1	1764.3	1946.81	1581.78	0.812497	-0.299565	0.287237	1
	Amdhd2	480.866	472.038	489.693	1.0374	0.0529729	0.287275	1
	Rad54l2	195.93	161.616	230.244	1.42463	0.510592	0.287461	1
	Trove2	906.826	757.54	1056.11	1.39413	0.479368	0.287553	1
	Jarid2	1002.88	848.574	1157.19	1.36369	0.447517	0.28764	1
	LOC100912024	11.1946	9.4711	12.9182	1.36396	0.447799	0.287736	1
	Syngr3	3626.3	3754.88	3497.72	0.931513	-0.102353	0.287782	1
	Gpm6b	17738.4	17131.7	18345	1.07082	0.0987133	0.288289	1
	Fam195b	2688	2955.66	2420.33	0.81888	-0.288277	0.288305	1
	Selm	2363.1	2530.17	2196.03	0.867937	-0.204338	0.288513	1
	Emid1	420.585	488.722	352.449	0.721165	-0.471598	0.288686	1
	Kpna2	420.094	493.516	346.673	0.702456	-0.50952	0.288778	1
	Bzw2	3297.82	3625.65	2970	0.819164	-0.287776	0.288779	1
	Wdr91	1151.22	1055.33	1247.12	1.18173	0.240906	0.288842	1
	Neurod6	7997.02	8101.16	7892.88	0.97429	-0.0375767	0.288921	1
	Ephb2	1396.85	1418.05	1375.65	0.970103	-0.04379	0.288987	1
	Sergef	1081.91	1141.72	1022.09	0.895219	-0.159687	0.289084	1
	Ikzf2	50.3589	41.5763	59.1416	1.42248	0.50841	0.289116	1
	Rn60_X_0711.1	47.6988	56.4623	38.9352	0.689579	-0.536212	0.289204	1
	Mgst3	1667.25	1808.57	1525.93	0.843723	-0.245158	0.289207	1
	Podxl2	5570.38	6037.52	5103.23	0.845253	-0.242545	0.289291	1
	Syt17	1081.15	1050.04	1112.27	1.05926	0.0830606	0.289396	1
	Ina	9108.24	9182.72	9033.75	0.983777	-0.023597	0.289495	1
	Tenm3	2573.18	2159.21	2987.15	1.38344	0.468264	0.289619	1
	Sypl1	1066.62	996.895	1136.35	1.13989	0.188892	0.289632	1
	AABR07072639.1	166.623	130.947	202.299	1.5449	0.62751	0.289706	1
	Acvr2a	946.485	787.938	1105.03	1.40244	0.487935	0.289762	1
	Cebpa	555.165	518.001	592.328	1.14349	0.193442	0.290031	1
	Rn60_X_0752.4	416.865	450.852	382.877	0.849231	-0.235771	0.290238	1
	Cyp2s1	35.8016	40.5591	31.0441	0.765404	-0.385707	0.290532	1
	Nmral1	164.76	200.806	128.714	0.640986	-0.641635	0.290646	1
	Acacb	82.7004	82.0532	83.3476	1.01577	0.0225803	0.290867	1
	Tnfsf13	106.334	110.83	101.838	0.918863	-0.122078	0.2909	1
	Lrrc49	2481.03	2708.07	2253.99	0.832323	-0.264785	0.291268	1
	Sec11c	2491.03	2764.68	2217.38	0.80204	-0.318254	0.291378	1
	Prkcq	185.03	159.204	210.856	1.32444	0.405383	0.291533	1
	Robo2	1754.31	1457.68	2050.94	1.40699	0.492615	0.291698	1
	Zdhhc7	1801.73	1922	1681.45	0.874844	-0.192902	0.29174	1
	Lgals3	2353.2	2264.86	2441.53	1.07801	0.108365	0.291805	1
	Hspa12b	64.1866	71.4775	56.8956	0.795993	-0.329173	0.291828	1
	Ptpn5	3493.32	3638.21	3348.43	0.920352	-0.119742	0.291837	1
	Tcf12	1132.83	1036.27	1229.4	1.18637	0.246551	0.291871	1
	Thbs2	711.362	671.792	750.932	1.1178	0.160668	0.291882	1
	Kcna6	2621.97	2658.06	2585.88	0.972847	-0.0397156	0.292037	1
	Ube2s	2524.2	2817.67	2230.73	0.791694	-0.336985	0.29222	1
	Zfp518b	542.893	459.015	626.77	1.36547	0.449393	0.292233	1
	Tdrd5	17.9356	22.3586	13.5126	0.604358	-0.726524	0.292263	1
	Tmem210	29.3904	33.0317	25.7491	0.779525	-0.359333	0.29227	1
	Slc25a22	63.2411	65.7007	60.7816	0.925129	-0.112273	0.292314	1
	Nudt19	373.884	428.088	319.681	0.746765	-0.421275	0.292603	1
	Ssh3	438.964	438.592	439.336	1.0017	0.0024434	0.292631	1
	Cst3	46438.1	46310.2	46565.9	1.00552	0.00794313	0.292662	1
	Lhx6	162.623	112.382	212.864	1.89411	0.921523	0.292772	1
	Adam12	339.901	279.702	400.101	1.43045	0.516472	0.292781	1
	Tcp11l1	476.237	383.279	569.196	1.48507	0.570531	0.292793	1
	Pdxdc1	313.41	283.467	343.352	1.21126	0.276506	0.292933	1
	Acadsb	309.758	253.739	365.777	1.44155	0.527619	0.293031	1
	Ctu1	477.64	521.064	434.217	0.833328	-0.263044	0.293104	1
	Angptl2	109.809	112.173	107.445	0.957857	-0.0621173	0.293167	1
	Amica1	37.3408	42.9851	31.6964	0.737382	-0.439516	0.29322	1
	AABR07072748.1	6.96232	5.38183	8.5428	1.58734	0.666613	0.293369	1
	Gramd3	1216.18	1220.65	1211.71	0.992676	-0.0106045	0.293407	1
	Dlx6	13.2272	9.38813	17.0662	1.81785	0.862234	0.293409	1
	Rn60_13_0828.1	40.2084	35.5206	44.8963	1.26395	0.337941	0.293421	1
	Dnajb1	1996.67	2175.98	1817.37	0.835195	-0.259816	0.293514	1
	Cd274	33.23	25.9567	40.5033	1.56042	0.641931	0.293545	1
	Chp1	1555.97	1659.62	1452.32	0.875092	-0.192494	0.293709	1
	Zc3hav1	855.201	810.452	899.951	1.11043	0.151119	0.293857	1
	Col6a5	27.1477	23.9384	30.3569	1.26813	0.342698	0.293876	1
	Ap2m1	28240.8	29838	26643.6	0.892941	-0.163363	0.294065	1
	Fgf13	15677.2	16228.3	15126.2	0.932084	-0.101468	0.294361	1
	Atp8a1	4475.11	3720.3	5229.92	1.40578	0.491371	0.294532	1
	Rpl18	4221.53	4982.44	3460.62	0.694562	-0.525824	0.294584	1
	Pfdn5	2106.24	2450.86	1761.63	0.718783	-0.476372	0.294608	1
	Polr2f	1097.49	1244.21	950.763	0.764147	-0.388078	0.294664	1
	C1galt1	812.248	773.659	850.838	1.09976	0.137187	0.294814	1
	Cyba	231.077	225.156	236.999	1.0526	0.0739578	0.294884	1
	AABR07061902.2	8.02434	5.31601	10.7327	2.01893	1.01359	0.295119	1
	Slc23a1	9.88354	7.92124	11.8458	1.49545	0.580581	0.295157	1
[truncated: 14,254 more rows]
