# Supplementary material for: Early Transcriptional Changes Induced by Wnt/β-Catenin Signaling in Hippocampal Neurons
Source: Hindawi journal article supplement (doi:10.1155/2016/4672841), 2016-01-01
Supplement: f1 [file 4672841.f1.zip › Supplementary Materials/gdf_Supplementary Table 4_NP_1811962.xlsx]

## Sheet: Supplementary Table 4
Supplementary Table 4. Subnetworks components.
Rank	Gene	Module	FoldChange	Log2FoldChange	pval	Interactions	Genes
1	Gfra1	M2	1.27111	0.346086	0.0567988	1	Ncam1
2	Utrn	M2	1.3043	0.383274	0.0580242	1	Dag1
3	Reln	M2	1.49369	0.578877	0.0584455	2	Gad1,Itga3
4	Lcat	M1	1.29896	0.377358	0.0688744	4	Cept1,Plb1,Pld1,Pld3
5	Col6a6	M2	1.4663	0.552184	0.0771195	1	Itga7
6	Lpcat2	M1	1.25082	0.322877	0.0841171	8	Cept1,Pla2g2f,Pla2g3,Pla2g4a,Pla2g5,Plb1,Pld1,Pld3
7	Crebbp	M3	1.30747	0.386782	0.0989151	3	Atf2,Atf4,Srebf1
8	Dmd	M2	1.2696	0.344379	0.111174	1	Dag1
9	Pla2g4a	M1	1.177	0.235109	0.131638	8	Cept1,Gnaq,Lpcat2,Mapk1,Pdl3,Plb1,Pld1,Pld3
10	Pik3r5	M1	1.93413	0.951682	0.139124	12	Inpp5b,Inpp5d,Itpr3,Lyn,Ocrl,Pi4kb,Pikfyve,Pip5k1b,Plce1,Synj1,Synj2,Vav3
11	Lamc2	M2	1.28786	0.364976	0.139346	4	Dag1,Itga3,Itga7,Lamb3
12	Ern1	M2,M3	1.25461	0.327241	0.172785	2	Atf6,Hspa5
13	Pik3c2a	M1	1.25326	0.325691	0.184809	9	Inpp5b,Inpp5d,Itpr3,Ocrl,Pi4kb,Pip5k1b,Plce1,Synj1,Synj2
14	Vav3	M1	1.25654	0.329458	0.187262	1	Pik3r5
15	Arhgef3	M1	1.2504	0.322393	0.208659	1	Ocrl
16	Srebf1	M1	1.29051	0.36794	0.212307	2	Crebbp,Gpam
17	Plce1	M1	1.14529	0.195717	0.234569	13	Dgka,Inpp5b,Itpr1,Itpr3,Ocrl,Pi4kb,Pik3c2a,Pik3c2b,Pik3r5,Pikfyve,Pip5k1b,Synj1,Synj2
18	Rps6ka3	M3	1.26674	0.341121	0.241994	2	Atf4,Mapk1
19	Unc13b	M3	1.32815	0.409421	0.246158	5	Cplx1,Rab3a,Stx1a,Stxbp1,Vamp2
20	Pla2g5	M1	0.953805	-0.0682333	0.256052	7	Apc,Cept1,Lpcat2,Pdl3,Plb1,Pld1,Pld3
21	Itga7	M2	0.940632	-0.0882977	0.258201	5	Col6a6,Lama3,Lamc1,Lamc2,Lyn
22	Lyn	M1,M2	1.31909	0.399546	0.268565	4	Itga7,Kras,Mapk1,Pik3r5
23	Wasl	M1	1.26934	0.344077	0.271825	1	Pip5k1b
24	Stx1a	M3	0.914461	-0.129007	0.275982	12	Cplx1,Cplx2,Dnajc5,Itpr1,Rab3a,Slc32a1,Stxbp1,Stxbp5,Unc13a,Unc13b,Vamp2,Vamp3
25	Atf6	M2,M3	1.25182	0.324025	0.302348	3	Atf4,Ern1,Hspa5
26	Pip5k1b	M1	1.02632	0.0374731	0.306538	12	Inpp5b,Inpp5d,Itpr3,Ocrl,Pi4kb,Pik3c2a,Pik3c2b,Pik3r5,Plce1,Synj1,Synj2,Wasl
27	Dag1	M2	1.05445	0.0764895	0.403395	7	Dmd,Lama3,Lamb3,Lamc1,Lamc2,Nrxn1,Utrn
28	Inpp5d	M1	1.30835	0.387743	0.426314	4	Pik3c2a,Pik3c2b,Pik3r5,Pip5k1b
29	Lamb3	M2	1.334	0.415763	0.443332	3	Dag1,Itga3,Lamc2
30	Rab3a	M3	1.0412	0.0582404	0.448328	8	Cplx1,Dnajc5,Rims1,Slc32a1,Stx1a,Stxbp1,Unc13b,Vamp2
31	Ero1lb	M3	1.29229	0.369934	0.45061	1	Pdia4
32	Gad1	M2,M3	1.26743	0.341906	0.457665	2	Reln,Slc32a1
33	Kras	M2	1.31088	0.390536	0.465273	2	Lyn,Ncam1
34	Synj2	M1	1.14965	0.201191	0.466094	8	Arfgef2,Itpr3,Pi4kb,Pik3c2a,Pik3c2b,Pik3r5,Pip5k1b,Plce1
35	Inpp5b	M1	1.28002	0.356169	0.472645	7	Itpr3,Pi4kb,Pik3c2a,Pik3c2b,Pik3r5,Pip5k1b,Plce1
36	Pikfyve	M1	1.29988	0.378384	0.474811	4	Itpr3,Pi4kb,Pik3r5,Plce1
37	Dgka	M1	1.00259	0.00372571	0.489967	8	Cept1,Itpr3,Lclat1,Pdl3,Plce1,Pld1,Pld3,Pnlip
38	Vamp2	M3	1.02625	0.0373888	0.49306	11	Cplx1,Cplx2,Dnajc5,Itpr1,Rab3a,Slc32a1,Stx1a,Stxbp1,Unc13a,Unc13b,Vamp3
39	Stxbp1	M3	1.11938	0.162693	0.496362	9	Cplx1,Dnajc5,Itpr1,Rab3a,Slc32a1,Stx1a,Unc13a,Unc13b,Vamp2
40	Rps6ka6	M3	1.33465	0.416466	0.542861	2	Atf4,Mapk1
41	Lamc1	M2	0.972948	-0.0395658	0.553144	4	Dag1,Itga3,Itga7,Prnp
42	Gpam	M1	1.14484	0.195146	0.568878	3	Agk,Lclat1,Srebf1
43	Arfgef2	M1	1.30142	0.380088	0.589543	1	Synj2
44	Pi4kb	M1	0.946455	-0.0793945	0.59264	11	Inpp5b,Itpr3,Ocrl,Pik3c2a,Pik3c2b,Pik3r5,Pikfyve,Pip5k1b,Plce1,Synj1,Synj2
45	Pld1	M1	0.868262	-0.203798	0.595928	12	Cept1,Dgka,Lcat,Lclat1,Lpcat2,Lpin1,Pdl3,Pla2g2f,Pla2g3,Pla2g4a,Pla2g5,Plb1
46	Pdia4	M3	0.784913	-0.349396	0.609821	2	Ero1lb,Hspa5
47	Slc32a1	M3	1.54108	0.623938	0.612946	7	Cplx1,Dnajc5,Gad1,Rab3a,Stx1a,Stxbp1,Vamp2
48	Itga3	M2	0.970513	-0.0431806	0.615647	5	Lama3,Lamb3,Lamc1,Lamc2,Reln
49	Cept1	M1	0.871076	-0.19913	0.623652	12	Dgka,Lcat,Lpcat2,Lpin1,Pdl3,Pla2g2f,Pla2g3,Pla2g4a,Pla2g5,Plb1,Pld1,Pld3
50	Cplx1	M3	1.08963	0.123831	0.662189	9	Cplx2,Dnajc5,Rab3a,Slc32a1,Stx1a,Stxbp1,Unc13b,Vamp2,Vamp3
51	Mapk1	M1	1.32085	0.401466	0.663068	5	Atf2,Lyn,Pla2g4a,Rps6ka3,Rps6ka6
52	LOC317456	M1	1.31747	0.397765	0.663523	1	Pla2g2f
53	Lpgat1	M1	1.28586	0.362737	0.686791	1	Pla2g2f
54	Atf4	M3	0.895479	-0.159268	0.703694	7	Atf2,Atf6,Crebbp,Eif2ak3,Hspa5,Rps6ka3,Rps6ka6
55	Nlgn3	M2	1.25283	0.325196	0.704584	1	Nrxn1
56	Agk	M1	1.04008	0.0566905	0.710954	3	Gpam,Lclat1,Pnlip
57	Vamp3	M3	0.849456	-0.235389	0.723352	4	Cplx1,Cplx2,Stx1a,Vamp2
58	Lama3	M2	0.945843	-0.0803282	0.726212	3	Dag1,Itga3,Itga7
59	Lpin1	M1	1.25343	0.325886	0.757521	6	Cept1,Lclat1,Pdl3,Pld1,Pld3,Pnlip
60	Synj1	M1	1.33679	0.418769	0.777552	7	Itpr3,Pi4kb,Pik3c2a,Pik3c2b,Pik3r5,Pip5k1b,Plce1
61	Cplx2	M3	1.27035	0.345224	0.780326	4	Cplx1,Stx1a,Vamp2,Vamp3
62	Gnaq	M1	1.30603	0.385191	0.781752	1	Pla2g4a
63	Prnp	M2,M3	0.996374	-0.00524094	0.782616	3	Hspa5,Lamc1,Ncam1
64	Dnajc5	M2,M3	1.28354	0.360129	0.787954	7	Cplx1,Hspa5,Rab3a,Slc32a1,Stx1a,Stxbp1,Vamp2
65	Nrxn1	M2	1.27223	0.347356	0.794811	2	Dag1,Nlgn3
66	Ncam1	M2,M3	1.27066	0.345577	0.797519	5	Cacnb2,Gfra1,Kras,LOC501189,Prnp
67	Dnajb3	M3	0.756481	-0.402624	0.822583	1	Hspa5
68	Hspa5	M2,M3	0.919214	-0.121527	0.829626	9	Atf4,Atf6,Dnajb3,Dnajb8,Dnajc5,Eif2ak3,Ern1,Pdia4,Prnp
69	Pld3	M1	1.04689	0.0661076	0.842393	12	Cept1,Dgka,Lcat,Lclat1,Lpcat2,Lpin1,Pdl3,Pla2g2f,Pla2g3,Pla2g4a,Pla2g5,Plb1
70	Atf2	M3	1.32275	0.403535	0.857194	3	Atf4,Crebbp,Mapk1
71	Cacnb2	M2	1.26083	0.334371	0.86033	1	Ncam1
72	Pik3c2b	M1	1.26745	0.341931	0.865076	9	Inpp5b,Inpp5d,Itpr3,Ocrl,Pi4kb,Pip5k1b,Plce1,Synj1,Synj2
73	LOC501189	M2	1.28921	0.366488	0.866727	1	Ncam1
74	Eif2ak3	M3	1.04783	0.0673977	0.867367	2	Atf4,Hspa5
75	Lclat1	M1	1.16801	0.224052	0.870048	7	Agk,Dgka,Gpam,Lpin1,Pla2g2f,Pld1,Pld3
76	Itpr1	M1,M3	1.27474	0.350205	0.875477	5	Itpr3,Plce1,Stx1a,Stxbp1,Vamp2
77	Ocrl	M1	1.16769	0.223656	0.879355	9	Arhgef3,Itpr3,Pi4kb,Pik3c2a,Pik3c2b,Pik3r5,Pip5k1b,Plce1,Plekhg5
78	Rbp2	M1	1.27631	0.351974	0.893997	1	Pnlip
79	Plekhg5	M1	1.2917	0.36927	0.941975	1	Ocrl
80	Unc13a	M3	1.28223	0.358652	0.948957	4	Rims1,Stx1a,Stxbp1,Vamp2
81	Apc	M1	1.25641	0.32931	0.961723	1	Pla2g5
82	Stxbp5	M3	1.25099	0.323071	0.969273	1	Stx1a
83	Pla2g3	M1	1.29395	0.371777	0.990304	6	Cept1,Lpcat2,Pdl3,Plb1,Pld1,Pld3
84	Plb1	M1	1.25541	0.328157	0.990425	10	Cept1,Lcat,Lpcat2,Pdl3,Pla2g2f,Pla2g3,Pla2g4a,Pla2g5,Pld1,Pld3
85	Dnajb8	M3	1	1	1	1	Hspa5
86	Pdl3	M1	1	1	1	12	Cept1,Dgka,Lcat,Lclat1,Lpcat2,Lpin1,Pdl3,Pla2g2f,Pla2g3,Pla2g4a,Pla2g5,Plb1
87	Itpr3	M1	1	1	1	13	Dgka,Inpp5b,Itpr1,Ocrl,Pi4kb,Pik3c2a,Pik3c2b,Pik3r5,Pikfyve,Pip5k1b,Plce1,Synj1,Synj2
88	Pla2g2f	M1	1	1	1	9	Cept1,Lclat1,LOC317456,Lpcat2,Lpgat1,Pdl3,Plb1,Pld1,Pld3
89	Pnlip	M1	1	1	1	4	Agk,Dgka,Lpin1,Rbp2
90	Rims1	M3	1.29262	0.370295	1	2	Rab3a,Unc13a
